# Supplementary material for: Quantitative analysis of the interplay between hsc70 and its co-chaperone HspBP1
Source: PeerJ. 2015 Dec 21;3:e1530. doi: 10.7717/peerj.1530 (PMC4690350; doi:10.7717/peerj.1530)
Supplement: Supplemental Information 1 [file peerj-03-1530-s001.xlsx]

## Sheet: Stats
	Ctl (BP1)				HS				1h				2h				3h
	Inner intens/area	Outer intens/area	N/C (in/out)		Inner intens/area	Outer intens/area	N/C (in/out)		Inner intens/area	Outer intens/area	N/C (in/out)		Inner intens/area	Outer intens/area	N/C (in/out)		Inner intens/area	Outer intens/area	N/C (in/out)
	23024.4	23859.4	0.965003		27890.2	40612.7	0.686735		32289.2	34514.6	0.935523		22285	40585	0.549094		42571.4	36954.9	1.15198
	30209.2	29684.8	1.01767		55524.4	43764.6	1.26871		33080.7	35101.4	0.942433		20326.4	24505.2	0.829472		29028.1	31703.8	0.915604
	37618	34702	1.08403		40651.5	37823.9	1.07476		30059	28895.2	1.04027		23767.2	25496.2	0.932186		24475	25107.2	0.974819
	38269.1	38372.9	0.997295		38318.3	39108.7	0.97979		23163.2	31101.8	0.744756		19799.9	31000.5	0.638696		21518.3	28870.5	0.745339
	31267.5	33784.7	0.925493		46324	37357.3	1.24003		24538	28940.2	0.847887		34115.9	14964	2.27986		26502.2	28535.5	0.928745
	33954.5	24223.7	1.40171		41060.9	39621.5	1.03633		26988	28137.9	0.959131		27054.4	23358.2	1.15824		26981.2	30605.6	0.881576
	28299.9	24702.3	1.14564		47221.3	36619.7	1.2895		26156.1	30410.8	0.860095		21729.9	21438.4	1.0136		39255.2	29809.6	1.31686
	23611.1	22474	1.0506		40413.5	37108.8	1.08905		34032.3	30016	1.1338		15027.4	27362	0.549207		41335.6	22176.2	1.86396
	32536.3	27766.5	1.17178		32957.1	30397.2	1.08421		28594.3	18722.8	1.52725		21745.6	27310.5	0.796237		23171.8	30017	0.771956
	31228.4	30504.3	1.02374		35332.4	31072.1	1.13711		27416	23517.2	1.16579		20528.9	33715.1	0.608892		26985.1	28515.5	0.94633
	25705.2	29127.7	0.882501		37362.9	30762.2	1.21457		28629.9	36251.1	0.789768		29456	27249.2	1.08098		29135.8	34028	0.856231
	32481	36000.2	0.902245		43822.2	32041.2	1.36768		71234.2	59750.8	1.19219		25398.6	40433.9	0.628152		32383.8	32383.6	1.00001
	33584.9	21770	1.54271		44487.6	31948.7	1.39247		41600.4	11365.6	3.6602		33052.9	38098.1	0.867575		33812.9	44824	0.754349
	32524.2	31070.5	1.04679		35687.1	28378.6	1.25754		23684.2	20720	1.14306		34576.4	38566.6	0.896537		46155.4	29329.4	1.57369
	29847.9	26327.1	1.13373		33795.1	31344.2	1.07819		27875.1	21534.4	1.29445		40347.1	40492	0.996422		32329.2	36994.5	0.873891
	24684	22875.3	1.07907		43469.9	39803.2	1.09212		39779	30993.1	1.28348		20881.5	27143.6	0.769295		19221.1	18937.1	1.015
	17905.8	14021.4	1.27704		23709.4	25632.5	0.924975		37321	23631.6	1.57928		26515.9	40561.1	0.653727		26452.5	23270.4	1.13674
	20142.5	16433.3	1.22571		36091.7	26510.6	1.36141		42241.8	27968	1.51036		28436.8	31407.9	0.905405		24774.2	27691	0.894666
	33397.9	26144.4	1.27744		20497	15157.4	1.35227		35944.4	28726.1	1.25128		20425.3	32500.9	0.628453		35199.6	28167.9	1.24964
	29397.6	22055.4	1.3329		39676.8	26557.8	1.49398		47033.1	41694.8	1.12803		30273	37596	0.805217		38048.8	33322.4	1.14184
	16299.7	13259.6	1.22928		20742.6	26336.6	0.787595		32890.9	41011.3	0.801995		34450.2	22479.8	1.5325		23590.4	18460.8	1.27787
	38074.8	33455.1	1.13809		24409.8	20281.2	1.20357		42332.4	42608.7	0.993515		19694.8	29323.3	0.671642		36459.8	34465.1	1.05788
	29544.5	36034.7	0.819889		38983.9	36101.2	1.07985		35488	33291.4	1.06598		34707.1	29359.1	1.18216		24651.2	29251.8	0.842726
	35125.4	39074.7	0.898931		42265.2	34570.9	1.22257		43833.3	44383.6	0.987602		38979	37895.9	1.02858		30668.1	35109.8	0.87349
	38182.9	30736.1	1.24228		27357.2	26884.8	1.01757		46082.3	35591.3	1.29477		25841.7	33237.2	0.777493		23085.9	30983.6	0.745101
	40383	32282.1	1.25094		40338.4	26908.8	1.49908		57536.1	35903.5	1.60252		28859.1	34642	0.833065		18123.1	19297.4	0.939148
	42388.7	28612.5	1.48147		41291.4	30825.6	1.33952		31355.1	37042.2	0.846469		61641.9	51526.7	1.19631		17156	17804.5	0.963575
	37404.6	32602.4	1.14729		28976.1	25544.7	1.13433		38164.7	40805.8	0.935277		44069.3	44976.3	0.979833		30414.5	35561.7	0.85526
	37153.1	31880.7	1.16538		27872.9	30116.3	0.925509		35011.8	36616.3	0.95618		57077.9	62836	0.908363		25205.3	30817.7	0.817884
	35240.2	37636.4	0.936334		38727.2	29383.2	1.318		38715.4	33731.4	1.14776		37844.5	50825.5	0.744596		21573.2	30965.1	0.696694
	34180.7	33344.1	1.02509		29134.6	23486.1	1.2405		42058.4	35962.2	1.16951		30898.3	47087.9	0.656182		23535.5	25689.2	0.916166
	34421.7	24789.5	1.38856		34346.4	32811.1	1.04679		31844.9	28378.4	1.12215		33934.6	49016.2	0.692314		26251.5	25843.8	1.01578
	39820.6	31537.8	1.26263		36778.8	37507.4	0.980573		35242.1	35896.7	0.981765		29523.6	55800.6	0.52909		29920.4	30185.1	0.991232
	33043.9	31929	1.03492		30917.7	28492.1	1.08513		34641.7	36365.3	0.952603		28416	45071.1	0.63047		17704.2	19538.7	0.90611
	27401	27129.2	1.01002		41645.4	29511	1.41118		36752.4	33879	1.08482		33801.8	22786.5	1.48341		15922.7	17779.1	0.895585
	30229.5	26991	1.11998		30623.6	35487.9	0.862931		35478.5	34802	1.01944		29844	44720.2	0.667349		17815.4	16213.6	1.0988
	34172.9	30394.7	1.1243		35148.7	32891.5	1.06863		31711.5	28569.6	1.10997		43947.9	50937.4	0.862784		30848.6	23713.9	1.30087
	36671.9	26938.1	1.36134		31778.3	25419.6	1.25015						29706	37014.5	0.802552		20848.8	18295.2	1.13958
	35453.2	19344.6	1.83271		31329.8	29508.6	1.06172						39085.9	31341.2	1.24711		26021.8	15870.8	1.6396
	34472	31456.3	1.09587		36057.7	29807.3	1.20969						33699.7	36833.3	0.914924		22148.6	27821.2	0.796105
	28198.3	24329.6	1.15901		34801	29482.1	1.18041						31657	36260.9	0.873032		33220.7	32292.3	1.02875
	35041.2	30972.3	1.13137										37402.6	47144.6	0.793359		20762.8	21460.9	0.967473
	31615	35387	0.893407										447.648	459.95	0.973254		34654.5	29390.3	1.17912
													26265.2	26132.1	1.00509		19864.9	20148.8	0.985911
													27407.5	40656.2	0.674129		27725.6	22592.6	1.2272
													33653.5	27980.2	1.20276		19232.8	24455	0.786457
													26852.9	38872.4	0.690797		50409	39221.3	1.28524
																	33847.3	31236.7	1.08357
																	32554.7	34573	0.941623
																	44179.3	34327.6	1.28699
																	39464.5	34314.1	1.15009
																	41517.3	40950.9	1.01383

## Sheet: set1 data
Ctl (BP1)				HS				1h				2h				3h
Inner intens/area	Outer intens/area	N/C (in/out)		Inner intens/area	Outer intens/area	N/C (in/out)		Inner intens/area	Outer intens/area	N/C (in/out)		Inner intens/area	Outer intens/area	N/C (in/out)		Inner intens/area	Outer intens/area	N/C (in/out)
28854.8	27244.2	1.05912		22127.4	27148.5	0.81505		27028.1	34562.9	0.781999		26040.1	35222.5	0.739302		27403.4	32060.1	0.854749
23604.5	22599	1.04449		24073.6	27840.1	0.864709		36690.2	35733.6	1.02677		24762.4	35665.7	0.694291		47076.4	48127.2	0.978166
27139	23544.8	1.15265		21489.9	26357.1	0.815336		39014.8	39282.7	0.993179		28452.1	30624.1	0.929075		46450.9	70913.7	0.655034
24454.1	22444.7	1.08953		29760.3	30128.8	0.987769		36439.8	42916.5	0.849086		25646.2	27413.4	0.935534		31581	51162	0.617275
34809.8	32566.8	1.06887		20285.7	26162.1	0.775384		33580.2	39242.3	0.855715		26582.4	33353.7	0.796986		45886.4	55143.3	0.83213
27670.1	26207.7	1.0558		31392.9	36347	0.8637		41131.4	35857.1	1.14709		26283	47440.6	0.554019		34215.4	45491.5	0.752127
28696.2	19156.6	1.49798		30286.1	29662	1.02104		37765	48869.5	0.772772		25715	37506.7	0.685611		30773.2	26698.8	1.15261
24124.7	21138.2	1.14128		27570.5	30619.4	0.900426		34055.4	40909.5	0.832456		28179.5	34603.5	0.814354		28332	29494.8	0.960576
31522	24700.3	1.27618		24924.2	26837.5	0.928707		41844.1	52632	0.795031		32247.7	42589.6	0.757172		26210.5	44257.2	0.592231
31911.2	27765.6	1.14931		34052.7	35819.9	0.950665		35092.6	50607.6	0.693426		28597.8	38911.2	0.734952		26834.5	29642.4	0.905272
24956.3	23687.4	1.05357		28950.9	27668.7	1.04634		32318.2	35600.6	0.907801		29682.3	32106.3	0.924498		21615.9	28483.2	0.758899
17384.5	18320.9	0.948888		29160.4	30782	0.947318		39201.5	40474.4	0.968552		25372.3	26048.6	0.974037		38387.6	40136.5	0.956427
29219.3	30460.7	0.959247		31889	31098.2	1.02543		38255.6	43652.4	0.876368		32038	43069.3	0.743871		21113.4	24060.9	0.877499
21437.4	22023	0.97341		29028.1	28236.9	1.02802		43713.3	51333.8	0.85155		37080.6	39485.6	0.939092		24043.6	33033.8	0.727848
28951	24281.8	1.19229		25333.5	22198.9	1.14121		29310	39595.2	0.740241		31149.9	48349.6	0.644263		41265	42521.7	0.970445
23126	22722.3	1.01777		24993.8	26504.7	0.942995		33318.6	39726.8	0.838693		28909.5	36672.4	0.788319		30145	46918.7	0.642494
27890.5	24626.4	1.13254		29893.3	27872.8	1.07249		38448.1	38375.6	1.00189		43207.2	35043.8	1.23295		30990.8	30505.7	1.0159
23881.8	18879.6	1.26495		27295.1	27704.2	0.985232		37382.2	49746.8	0.751449		22820.1	36852.2	0.619232		31247.1	40482	0.771878
22487.3	19097.4	1.17751		25328.7	28380.5	0.892466		40676.4	42955	0.946955		20529.2	37377.7	0.549237		37611	37086.5	1.01414
26544.9	22795.2	1.16449		26165	30695.9	0.852394		48220.2	52565.5	0.917336		26598.4	34443.3	0.772239		28488.8	43842.2	0.649803
30506.1	24784.9	1.23083		35130	36859.5	0.953078		34346.6	36380.6	0.944093		32899.3	32649.2	1.00766		24004.4	25795.9	0.93055
30053.3	26114	1.15085		35494.2	33088.3	1.07271		34632.1	43368.5	0.798554		27953.5	36035.8	0.775716		26096.7	28842.9	0.90479
30395.7	25592.3	1.18769		30132.1	37951.1	0.79397		27701.3	35607.6	0.777959		28114.3	42916.2	0.655099		27765.2	34763.7	0.798684
26826.6	24370.6	1.10078		27254.8	26912.3	1.01273		34315.4	45989.4	0.74616		25676.5	39997.4	0.641955		40806.4	35584.2	1.14676
31661.7	28499.8	1.11095		30825.8	37952.3	0.812223		41095.3	54566.3	0.753126		27087.3	27689	0.978269		32259.4	41037.8	0.786091
29687.7	24303.8	1.22153		24542.1	25901.1	0.947532		37769.3	51268.6	0.736695		25781	27658.9	0.932106		38349.3	47642.7	0.804936
28266.1	29719.5	0.951095		28886.6	22949.6	1.2587		43976.8	48675.7	0.903465		29043.2	34594.7	0.839525		32453.9	38884.6	0.834621
24834.9	24385.4	1.01843		29923.4	26210.6	1.14165		39022.4	52034.7	0.749931		28071.2	31813.9	0.882356		29368.5	37559.9	0.781911
30327.5	26268.9	1.1545		25055.3	26726.5	0.93747		41508.3	48747.8	0.85149		19874.7	28863.8	0.688567		31006.8	44020.2	0.704376
24718	22631.1	1.09222		28572.6	24093.1	1.18592		50871.8	58830.7	0.864716		23448.7	37143.9	0.631294		40860.3	47416	0.861741
33002	27282.6	1.20964		30889.7	23534.5	1.31253		40093	75564.2	0.530583		19101.2	28571.9	0.668531		32793.2	43579.1	0.752499
36559.3	31657.3	1.15485		26026.5	30959.8	0.840654		35708.1	54998.1	0.649261		30101.1	32969.1	0.913011		37547.2	36802.2	1.02025
33526.5	27739.3	1.20863		21357.8	21725.2	0.983088		35734.9	38692.5	0.923561		29116.2	35058.1	0.830515		22681.8	34750.4	0.652705
34499.5	32525	1.06071		28428.7	28004.3	1.01515		44968.3	47246.8	0.951774		45765.1	29049.9	1.5754		32270.2	40156	0.803621
29410.2	26166	1.12399		23853	25752.3	0.926247		44548	59265.3	0.75167		31178.8	37661.7	0.827865		27096.4	39311.9	0.689266
36071.7	28904.6	1.24795		18231	23871.3	0.76372		39623.7	43688.6	0.906956		19749.8	33545.8	0.588741		24525.6	33809.5	0.725406
37636.5	30132.5	1.24903		30918.3	27933.1	1.10687		35009.9	40602	0.862272		20608.7	29262	0.704281		39770.3	41426.6	0.960018
32133.2	29019.9	1.10728						49237.2	50126.1	0.982268		23565.8	31769.6	0.741773		26541.6	27659.7	0.959577
31618.2	29151.4	1.08462						34580.1	49814.5	0.694177		20539	23382.9	0.878377		20019	37542.5	0.533236
32575.2	29650.3	1.09865						33958.3	49910.8	0.680381		17374.9	29324.9	0.592494		35319.5	35971.1	0.981888
								37912	44936.9	0.843672		20620	36184.6	0.569855		35162.4	39118.7	0.898863
												20945.6	32401.7	0.646436		27990.1	36374.1	0.769506
												20436.8	29601	0.69041		34547.8	35899.9	0.962337
												28083	33009.7	0.850749
Ctl (Hsc70)				HS				1h				2h				3h
Inner intens/area	Outer intens/area	N/C (in/out)		Inner intens/area	Outer intens/area	N/C (in/out)		Inner intens/area	Outer intens/area	N/C (in/out)		Inner intens/area	Outer intens/area	N/C (in/out)		Inner intens/area	Outer intens/area	N/C (in/out)
8555.96	15882.8	0.538692		15236.8	15634.1	0.974589		28688.6	13176.1	2.17731		16032.5	13169.7	1.21738		36213.7	12831.6	2.82222
7049.1	14866.1	0.474173		14924.8	22131.6	0.674366		30838.1	12614.5	2.44465		18331.1	10937.9	1.67593		39060.5	16490.2	2.36871
7912.18	16026.3	0.493699		15939.3	17029.8	0.935965		26545.7	19193.6	1.38305		20133.2	10900.6	1.84698		32728.9	26640.8	1.22853
7046.91	14309.2	0.492474		20004.2	22523.8	0.888137		32861.8	20876.5	1.57411		21682	13511.9	1.60466		31767.9	17687.9	1.79602
10102.1	16515	0.611693		11754.1	16727.4	0.702682		20636.2	14988.2	1.37683		20046.9	11657.5	1.71966		27833.4	15382.5	1.80942
7786.34	16194.4	0.480806		19928.5	23049.8	0.864587		33502.4	15000.1	2.23348		20530.6	17401.6	1.17981		40648	14725	2.76046
10754.4	15168.2	0.709009		17627.3	21256.9	0.829252		40750.5	21716.8	1.87645		17727.9	12572.5	1.41005		38746.8	11616.7	3.33544
7198.93	13264.8	0.542709		17168.5	25805.9	0.665295		40131.3	19291.5	2.08026		21038.7	15693.6	1.34059		29224.7	14412.4	2.02774
12163.1	23987.5	0.507059		14829.3	16238.3	0.913233		28068.5	20892.5	1.34347		34599.1	15741.1	2.19801		26985.6	11299.9	2.38813
12144	26190.2	0.463686		20510	20460	1.00245		26848.8	20912.8	1.28384		21975	16764.3	1.31082		30559.4	10534.9	2.90078
10147.1	18208.7	0.557269		15580.1	16682.8	0.933907		38358.4	14232	2.69523		15557.5	17504	0.888794		20749	10208.7	2.03249
6648.69	14618.6	0.454811		18497.3	25175.6	0.73473		35849.1	19833.4	1.80751		18461.7	12018.8	1.53607		33606.3	13311.7	2.52457
11351.3	21695	0.523223		19723.6	20003	0.98603		27751.6	16555.1	1.67632		24827.7	20464	1.21324		17201	8503.05	2.02292
9234.97	19361	0.476989		16074	18727.5	0.858306		23981.2	19103.5	1.25533		27367.1	14736.7	1.85706		31387.5	10755.6	2.91826
11597.5	19299.8	0.600912		21130.4	16394.5	1.28887		24114.2	17845.8	1.35125		19711.7	21395.4	0.921305		39081.2	10046.3	3.8901
10869.6	18881.2	0.575684		21397.3	20105.9	1.06423		29091.4	14272.7	2.03826		21338	21064.5	1.01299		30996.6	15608.9	1.98583
10399	20030	0.519169		24878.5	20951.5	1.18743		33649.1	19868.4	1.6936		28013.6	20461.6	1.36908		35381.4	14772.1	2.39515
11051.1	20224	0.546437		18374.4	19986.9	0.919319		32008.2	20165.8	1.58725		14191.8	8751	1.62174		38199.4	16973	2.25059
10436.7	18578.1	0.561772		12243.7	15848.6	0.772543		33285.4	18400.4	1.80895		14612.5	9917.2	1.47345		28481.4	14246.8	1.99914
10217.3	20119.8	0.507822		12344.3	17547.7	0.703473		27543.8	20698.4	1.33072		22005.1	10220.2	2.15309		34883.4	13561.5	2.57224
9858.68	20211.1	0.487786		27676.8	28983.5	0.954914		27592.5	16290.8	1.69375		21304.4	8789.2	2.42393		20071.2	8478.32	2.36735
9619.01	19042.9	0.505122		26237.5	23350.6	1.12363		20588.4	20804.1	0.98963		24101.8	13755.6	1.75214		30285.6	12799.8	2.3661
9615.28	20696.6	0.464582		23361.4	27694.9	0.843527		20198.4	14430.7	1.39968		19360.3	12833	1.50864		20885.7	11766.9	1.77495
10431.7	23033.7	0.45289		14551.4	15872.2	0.916789		27013.4	19567.1	1.38055		13852.5	11359.6	1.21945		33139.9	13737.3	2.4124
10286.6	21877.3	0.470196		15598.4	20326.7	0.767384		26998.5	21679.9	1.24532		16965.8	13011.7	1.30388		27163.3	12199.7	2.22655
11195	23297.4	0.480526		20530.3	17585.2	1.16748		28702.5	24478	1.17258		16189.9	12302.7	1.31596		27375.1	16290.9	1.68039
9416.64	22616.4	0.416363		17352	13814.5	1.25608		28270.3	18174.4	1.5555		15971.7	11654.5	1.37043		35883.8	13488.9	2.66025
8339	19938.7	0.418233		19333.2	16250.2	1.18972		37415.2	26352.2	1.41982		10341.7	10009	1.03324		26289.5	12330.7	2.13205
11878.2	22743	0.52228		19097.5	17266.7	1.10604		32211.5	25621.3	1.25721		12170.8	10708.5	1.13656		28656.6	16676.1	1.71842
9045.72	20762.8	0.435668		17671.4	14030.8	1.25948		35946.1	26621.8	1.35025		19641.9	11781.4	1.66719		25332.5	22739.2	1.11404
10912.1	18965.1	0.57538		18482.3	13782.5	1.341		28279.3	28132.1	1.00523		22969.3	9984.04	2.30061		36258.4	22183.9	1.63445
14099.4	25951	0.54331		14960.1	16687.8	0.896473		19172.2	17148.3	1.11803		13552.3	12257.6	1.10562		24247.4	17944.5	1.35124
11456.6	24514.5	0.467338		22670.6	15370.8	1.47491		31140.8	18540	1.67966		12305.9	13926.7	0.883621		16930.7	10272.1	1.64822
11715.6	26321.3	0.445099		19829.7	18843.6	1.05233		27449.8	19967.7	1.37471		7711.47	9564.19	0.806285		25857.9	13482.5	1.91789
10611.3	20949.3	0.506525		15901.7	17408.9	0.913421		28939	24424.4	1.18484		20752.4	12286	1.68911		21514.5	10821.4	1.98815
10874.7	18811.1	0.578099		9391.71	17175.3	0.546815		30608	18517.8	1.6529		13994.2	12464	1.12277		21233.8	11564.1	1.83618
11491.4	23013.6	0.499333		13312.5	15392.2	0.864883		34941.6	20115.4	1.73706		14981.8	11359.2	1.31892		23826.2	9562.56	2.49161
10969.8	23543.3	0.465941						41694.7	27382.1	1.5227		19083.8	13371.6	1.42719		22571.9	7790.19	2.89748
11400.9	26172.3	0.435612						28254.9	19865.2	1.42233		12723.7	9605.86	1.32458		22193.2	12263.3	1.80973
10207.8	22047.6	0.462991						18102.5	17959.9	1.00794		22862.5	12762.4	1.79139		33705.9	10404	3.23971
								28798	19046.5	1.51198		20111.5	13391.2	1.50184		30139.1	12931.9	2.33059
												20260.2	13498.6	1.50091		26087	13425.8	1.94305
												19981	12633.8	1.58155		30557.9	14708.7	2.07755
												24670.8	14202.5	1.73707

## Sheet: set2 data
Ctl (BP1)				HS				1h				2h				3h
Inner intens/area	Outer intens/area	N/C (in/out)		Inner intens/area	Outer intens/area	N/C (in/out)		Inner intens/area	Outer intens/area	N/C (in/out)		Inner intens/area	Outer intens/area	N/C (in/out)		Inner intens/area	Outer intens/area	N/C (in/out)
23024.4	23859.4	0.965003		27890.2	40612.7	0.686735		32289.2	34514.6	0.935523		22285	40585	0.549094		42571.4	36954.9	1.15198
30209.2	29684.8	1.01767		55524.4	43764.6	1.26871		33080.7	35101.4	0.942433		20326.4	24505.2	0.829472		29028.1	31703.8	0.915604
37618	34702	1.08403		40651.5	37823.9	1.07476		30059	28895.2	1.04027		23767.2	25496.2	0.932186		24475	25107.2	0.974819
38269.1	38372.9	0.997295		38318.3	39108.7	0.97979		23163.2	31101.8	0.744756		19799.9	31000.5	0.638696		21518.3	28870.5	0.745339
31267.5	33784.7	0.925493		46324	37357.3	1.24003		24538	28940.2	0.847887		34115.9	14964	2.27986		26502.2	28535.5	0.928745
33954.5	24223.7	1.40171		41060.9	39621.5	1.03633		26988	28137.9	0.959131		27054.4	23358.2	1.15824		26981.2	30605.6	0.881576
28299.9	24702.3	1.14564		47221.3	36619.7	1.2895		26156.1	30410.8	0.860095		21729.9	21438.4	1.0136		39255.2	29809.6	1.31686
23611.1	22474	1.0506		40413.5	37108.8	1.08905		34032.3	30016	1.1338		15027.4	27362	0.549207		41335.6	22176.2	1.86396
32536.3	27766.5	1.17178		32957.1	30397.2	1.08421		28594.3	18722.8	1.52725		21745.6	27310.5	0.796237		23171.8	30017	0.771956
31228.4	30504.3	1.02374		35332.4	31072.1	1.13711		27416	23517.2	1.16579		20528.9	33715.1	0.608892		26985.1	28515.5	0.94633
25705.2	29127.7	0.882501		37362.9	30762.2	1.21457		28629.9	36251.1	0.789768		29456	27249.2	1.08098		29135.8	34028	0.856231
32481	36000.2	0.902245		43822.2	32041.2	1.36768		71234.2	59750.8	1.19219		25398.6	40433.9	0.628152		32383.8	32383.6	1.00001
33584.9	21770	1.54271		44487.6	31948.7	1.39247		41600.4	11365.6	3.6602		33052.9	38098.1	0.867575		33812.9	44824	0.754349
32524.2	31070.5	1.04679		35687.1	28378.6	1.25754		23684.2	20720	1.14306		34576.4	38566.6	0.896537		46155.4	29329.4	1.57369
29847.9	26327.1	1.13373		33795.1	31344.2	1.07819		27875.1	21534.4	1.29445		40347.1	40492	0.996422		32329.2	36994.5	0.873891
24684	22875.3	1.07907		43469.9	39803.2	1.09212		39779	30993.1	1.28348		20881.5	27143.6	0.769295		19221.1	18937.1	1.015
17905.8	14021.4	1.27704		23709.4	25632.5	0.924975		37321	23631.6	1.57928		26515.9	40561.1	0.653727		26452.5	23270.4	1.13674
20142.5	16433.3	1.22571		36091.7	26510.6	1.36141		42241.8	27968	1.51036		28436.8	31407.9	0.905405		24774.2	27691	0.894666
33397.9	26144.4	1.27744		20497	15157.4	1.35227		35944.4	28726.1	1.25128		20425.3	32500.9	0.628453		35199.6	28167.9	1.24964
29397.6	22055.4	1.3329		39676.8	26557.8	1.49398		47033.1	41694.8	1.12803		30273	37596	0.805217		38048.8	33322.4	1.14184
16299.7	13259.6	1.22928		20742.6	26336.6	0.787595		32890.9	41011.3	0.801995		34450.2	22479.8	1.5325		23590.4	18460.8	1.27787
38074.8	33455.1	1.13809		24409.8	20281.2	1.20357		42332.4	42608.7	0.993515		19694.8	29323.3	0.671642		36459.8	34465.1	1.05788
29544.5	36034.7	0.819889		38983.9	36101.2	1.07985		35488	33291.4	1.06598		34707.1	29359.1	1.18216		24651.2	29251.8	0.842726
35125.4	39074.7	0.898931		42265.2	34570.9	1.22257		43833.3	44383.6	0.987602		38979	37895.9	1.02858		30668.1	35109.8	0.87349
38182.9	30736.1	1.24228		27357.2	26884.8	1.01757		46082.3	35591.3	1.29477		25841.7	33237.2	0.777493		23085.9	30983.6	0.745101
40383	32282.1	1.25094		40338.4	26908.8	1.49908		57536.1	35903.5	1.60252		28859.1	34642	0.833065		18123.1	19297.4	0.939148
42388.7	28612.5	1.48147		41291.4	30825.6	1.33952		31355.1	37042.2	0.846469		61641.9	51526.7	1.19631		17156	17804.5	0.963575
37404.6	32602.4	1.14729		28976.1	25544.7	1.13433		38164.7	40805.8	0.935277		44069.3	44976.3	0.979833		30414.5	35561.7	0.85526
37153.1	31880.7	1.16538		27872.9	30116.3	0.925509		35011.8	36616.3	0.95618		57077.9	62836	0.908363		25205.3	30817.7	0.817884
35240.2	37636.4	0.936334		38727.2	29383.2	1.318		38715.4	33731.4	1.14776		37844.5	50825.5	0.744596		21573.2	30965.1	0.696694
34180.7	33344.1	1.02509		29134.6	23486.1	1.2405		42058.4	35962.2	1.16951		30898.3	47087.9	0.656182		23535.5	25689.2	0.916166
34421.7	24789.5	1.38856		34346.4	32811.1	1.04679		31844.9	28378.4	1.12215		33934.6	49016.2	0.692314		26251.5	25843.8	1.01578
39820.6	31537.8	1.26263		36778.8	37507.4	0.980573		35242.1	35896.7	0.981765		29523.6	55800.6	0.52909		29920.4	30185.1	0.991232
33043.9	31929	1.03492		30917.7	28492.1	1.08513		34641.7	36365.3	0.952603		28416	45071.1	0.63047		17704.2	19538.7	0.90611
27401	27129.2	1.01002		41645.4	29511	1.41118		36752.4	33879	1.08482		33801.8	22786.5	1.48341		15922.7	17779.1	0.895585
30229.5	26991	1.11998		30623.6	35487.9	0.862931		35478.5	34802	1.01944		29844	44720.2	0.667349		17815.4	16213.6	1.0988
34172.9	30394.7	1.1243		35148.7	32891.5	1.06863		31711.5	28569.6	1.10997		43947.9	50937.4	0.862784		30848.6	23713.9	1.30087
36671.9	26938.1	1.36134		31778.3	25419.6	1.25015						29706	37014.5	0.802552		20848.8	18295.2	1.13958
35453.2	19344.6	1.83271		31329.8	29508.6	1.06172						39085.9	31341.2	1.24711		26021.8	15870.8	1.6396
34472	31456.3	1.09587		36057.7	29807.3	1.20969						33699.7	36833.3	0.914924		22148.6	27821.2	0.796105
28198.3	24329.6	1.15901		34801	29482.1	1.18041						31657	36260.9	0.873032		33220.7	32292.3	1.02875
35041.2	30972.3	1.13137										37402.6	47144.6	0.793359		20762.8	21460.9	0.967473
31615	35387	0.893407										447.648	459.95	0.973254		34654.5	29390.3	1.17912
												26265.2	26132.1	1.00509		19864.9	20148.8	0.985911
												27407.5	40656.2	0.674129		27725.6	22592.6	1.2272
												33653.5	27980.2	1.20276		19232.8	24455	0.786457
												26852.9	38872.4	0.690797		50409	39221.3	1.28524
																33847.3	31236.7	1.08357
																32554.7	34573	0.941623
																44179.3	34327.6	1.28699
																39464.5	34314.1	1.15009
																41517.3	40950.9	1.01383
Ctl (Hsc70)				HS				1h				2h				3h
Inner intens/area	Outer intens/area	N/C (in/out)		Inner intens/area	Outer intens/area	N/C (in/out)		Inner intens/area	Outer intens/area	N/C (in/out)		Inner intens/area	Outer intens/area	N/C (in/out)		Inner intens/area	Outer intens/area	N/C (in/out)
9411.29	17321	0.543346		12347.6	20018.9	0.616798		30947.3	12119.9	2.55343		23925.4	16773.2	1.42641		24452.9	10213.6	2.39415
10553.3	21704.2	0.486233		24351.3	19829.9	1.22801		27693.5	14957	1.85154		25505.5	13398.8	1.90357		26718.8	11028.5	2.42271
8049.61	18733.8	0.429685		22283.4	19783.1	1.12639		20312.3	8561.17	2.37261		25640.1	6752.21	3.79729		28118.8	10734.5	2.61948
9162.35	22491.9	0.407363		21195.1	17953.8	1.18053		14736.1	8182.42	1.80095		20135.4	8427.67	2.3892		27770.9	9444.65	2.94038
9526.7	24493.4	0.38895		26966.7	17216.8	1.5663		16524.9	9769.6	1.69146		25237.7	5406.69	4.66786		25090.4	8611.39	2.91363
10114.7	15298.2	0.66117		23698.6	18198	1.30227		30486.5	9451.22	3.22567		20110	8408.16	2.39173		20469	7492.35	2.73199
11030.2	19496	0.565766		24105.5	14486.8	1.66396		20661.6	13949	1.48122		14672.3	9960.16	1.47309		21730.5	10479.2	2.07367
8778.44	16298.4	0.538606		23622.7	19426.7	1.21599		25272.6	13356.3	1.89219		15454.1	9082.86	1.70146		24807.3	5007.52	4.95402
11083.2	18964.4	0.58442		11551.7	13130.1	0.87979		23995.9	7133.9	3.36365		24202.5	7231.37	3.34687		21119	7499.62	2.81601
10556.1	20766.2	0.50833		14012.3	10791	1.29852		20881.4	10768.7	1.93908		17324.5	10084.5	1.71794		23585.9	5145.76	4.58357
7406.1	18742	0.39516		16271.8	12866.3	1.26469		25288.1	12109.7	2.08825		19897.6	6667.51	2.98426		19725.8	6691.46	2.9479
8537.94	20264.3	0.421328		21105.5	10496.1	2.0108		23105.6	25863.4	0.893371		28666.6	16682.9	1.71832		24228.3	6872.25	3.52553
8136.38	13887.4	0.585884		19227.3	12920.7	1.4881		14604.8	4318.1	3.38223		22121.1	12084.7	1.83051		12946	12133	1.06701
11260.2	22084.9	0.509861		17679	11057.6	1.59881		27154.5	10888.2	2.49394		22144.5	12574.6	1.76105		25612.4	6175.11	4.14768
8726.43	15533.2	0.561792		12311.9	13799.6	0.892189		10433.9	6588.25	1.58371		19637.4	11588.3	1.69458		20048.9	8176.21	2.45211
7874.19	16572.8	0.475129		19374.7	22482.8	0.861755		29829.3	10483.5	2.84537		23609.3	16469.5	1.43352		28402.8	5096.17	5.57336
7426.86	13248.4	0.560586		17268.2	14031.3	1.23069		28707.4	7337.59	3.91238		20592.5	16872.2	1.2205		25755.5	6862.32	3.75317
8908.37	18857.1	0.472414		19510	12263.2	1.59094		29843.4	8789.2	3.39546		29147	11533.2	2.52722		27509.7	6353.06	4.33014
10166.2	16245	0.625806		14396	7013.68	2.05256		26045.1	11361.7	2.29235		29312.5	11535.8	2.54101		20020.2	6987.96	2.86495
8952.08	14632.2	0.611807		19974.7	10920.5	1.8291		28657.4	14855	1.92914		29950.8	10879.3	2.75301		18996.6	5707.31	3.32847
5428.65	8429.31	0.64402		13864.7	13397.8	1.03485		27047.6	16780.3	1.61187		23702.4	12308.4	1.92572		11962.2	6388.21	1.87255
10621.3	24046.5	0.441698		18365.5	9304.38	1.97386		27434.5	16130.7	1.70077		34471	11093.7	3.10726		19354	8484.77	2.28103
8648.68	23927.5	0.361453		15926.3	18739.6	0.849875		20714.2	10372	1.99714		20901.3	15620.5	1.33807		14269.8	9286.55	1.53661
9370.36	26246.3	0.357016		21459.4	18113.9	1.18469		26800.3	17770.4	1.50814		33495.4	14164.3	2.36478		14351.9	4149.58	3.45863
10988	23878.2	0.460166		15234.9	13948.4	1.09223		25843.2	12659.9	2.04134		31032.4	8934.89	3.47318		11425.1	4883.77	2.3394
10189.2	20381.1	0.499936		19366.7	13188.8	1.46843		22500.8	15819.6	1.42234		34662.1	10407.1	3.33061		14710.5	3569.13	4.12159
10118.3	18930.9	0.534486		19613.3	13703.5	1.43126		26424.4	13782.6	1.91723		19865.5	25102	0.791391		23567.3	2858.14	8.24567
11829.9	24241	0.488013		16041.4	11297.7	1.41987		22709.9	16148	1.40636		52161.6	14024.2	3.71939		12434.9	3397.59	3.65991
11885.3	23250	0.511195		15552.8	16021.3	0.970763		29395.2	10950.9	2.68426		15435.4	29894.5	0.51633		15600	4786.92	3.25888
12640.7	25376.1	0.498134		18606.4	10329.1	1.80135		25215.9	13144.8	1.91831		34556.3	10692.5	3.23183		11343.2	4174.46	2.71729
12971.3	26676.8	0.486239		17387.9	12084.6	1.43884		24549.5	9777.56	2.5108		45127.2	15339	2.94199		19452	5831.52	3.33567
12920.7	20622.6	0.626534		17771	10794.3	1.64633		27161.9	14280.2	1.90207		36613.9	16732.9	2.18814		13195.2	4727.69	2.79105
10974.9	20378.3	0.53856		15625.9	16559.1	0.943641		31445.3	13949.8	2.25417		35339.6	19442.2	1.81768		15918.1	6596.59	2.41308
8634.91	19831.9	0.435404		11670	11095.2	1.0518		25597.8	12301.2	2.08093		39522.5	11650.5	3.39234		18453.2	5481.12	3.36669
8764.67	22918.8	0.382423		19267.6	12771.2	1.50867		35347.7	13773	2.56644		32057.2	9488.65	3.37847		14470.9	4115.61	3.51609
11525.6	18038.2	0.638956		12719.5	14552.2	0.87406		27089	11736.2	2.30815		29292.8	15625.1	1.87473		19422	5320.04	3.65073
10271.9	22303.7	0.460548		20949.7	13285	1.57695		30367	13226.9	2.29586		27684.5	14352.3	1.92892		16687.7	4190.79	3.98199
13367.9	21784.8	0.613634		19854.1	10672.4	1.86032						29254	10799.5	2.70884		14768.8	4947.76	2.98495
10700.8	13671.4	0.782717		15515.5	12636.9	1.22779						36476.8	12254.8	2.97653		24698.9	2971.65	8.31154
9731.45	20952.9	0.464444		21470.7	11422.1	1.87975						27390.3	10505.8	2.60716		27543.4	6022.11	4.57371
7921.48	17476.2	0.453272		24563.3	12800.1	1.91899						32020.8	13601.3	2.35424		21978.3	4397.2	4.99826
8281.39	18722.9	0.442315										29047.4	15799.3	1.83853		21667.3	5681.12	3.81391
8677.54	18374.1	0.47227										24023.7	21420.1	1.12155		17402.5	6140.94	2.83386
												19796	12114.6	1.63407		20052.8	4335.54	4.62522
												26380.8	14579.7	1.80942		18082.1	4110.27	4.39924
												17792.4	10521.5	1.69105		19632.2	7260.83	2.70384
												29431.5	15087.5	1.95072		24525.3	6911.8	3.54833
																28724.9	6808.25	4.21913
																23279.7	12122.9	1.92031
																28860.4	9007.17	3.20416
																28851.5	7075.59	4.07761
																23696.1	5835.92	4.06038

## Sheet: set3 data
Ctl (BP1)				HS				1h				2h				3h
Inner intens/area	Outer intens/area	N/C (in/out)		Inner intens/area	Outer intens/area	N/C (in/out)		Inner intens/area	Outer intens/area	N/C (in/out)		Inner intens/area	Outer intens/area	N/C (in/out)		Inner intens/area	Outer intens/area	N/C (in/out)
22354.9	17904	1.2486		37868.6	28125.3	1.34643		19888.1	16238.5	1.22475		24671.8	22732.9	1.08529		33819.1	26373.1	1.28233
21355	15700.7	1.36013		36939	28870	1.27949		21539.7	19543.6	1.10214		20307.2	22126.1	0.917795		41812.6	27940.7	1.49648
13839.1	12784.6	1.08249		34116.2	23995	1.42181		27550.1	18404.2	1.49695		19332.7	16753.5	1.15395		31836.2	25839.1	1.23209
15164.5	13141.5	1.15394		36168.8	32854.4	1.10088		22235.9	19674.8	1.13017		27096.1	20242.9	1.33855		21473.9	23900.9	0.898454
18914.7	14541.5	1.30074		32369.1	23643.6	1.36905		20949.2	14133	1.48229		22375.8	20257.5	1.10457		32966.6	25413.3	1.29721
15485	9456.48	1.6375		33644.3	25684.6	1.3099		24858.5	19005.2	1.30798		22855.7	18399.4	1.2422		50915.9	32751.1	1.55463
13345.5	12181.9	1.09551		33524	25016.7	1.34006		22996.3	20816.4	1.10472		23317.9	23283.8	1.00147		38133.3	28550.1	1.33566
15722.5	16383.7	0.959639		35250.9	24036.6	1.46655		17627.2	15271.6	1.15424		20781.8	23258.3	0.893521		48773.8	31945.9	1.52676
21241.5	17971.2	1.18197		41137.4	40579.7	1.01375		23142.5	19707.9	1.17427		18779.7	23478.7	0.79986		44889.4	27154	1.65314
24472.9	24418.1	1.00225		35478.9	22991.4	1.54313		18610.7	14392.9	1.29305		22391.4	24281.7	0.92215		26721.7	22596.9	1.18254
15987.8	16695.4	0.957619		30551	19144	1.59585		22045.6	12357.2	1.78403		20430.3	18366.8	1.11235		32575.7	30122.9	1.08143
18983.7	18159.7	1.04538		34726.3	21503.1	1.61495		17410.5	15467.7	1.1256		20006.3	19680.6	1.01655		27107.6	21543.9	1.25825
14437.4	14805.1	0.975164		30938.3	21169.6	1.46145		21644.6	17778.9	1.21743		20318.6	17572	1.1563		35769.9	26557.4	1.34689
21355.4	23397.8	0.912712		39400.1	28062.8	1.404		20882.5	17322.3	1.20553		19027.6	23487.1	0.810129		44293.1	30784.3	1.43882
16513.1	14529.7	1.13651		35926.9	23248.5	1.54535		24626.7	22226	1.10801		20789.4	27722.7	0.749906		48859.4	37197.2	1.31352
19069.6	18738.7	1.01766		39269.5	30888.5	1.27133		19215.2	16490	1.16526		21003.2	23822.3	0.881662		31193.5	26968.4	1.15667
18333.5	15001.9	1.22208		29010.8	21959.9	1.32108		17085.3	16428.6	1.03997		22771.6	24376.9	0.934148		23686.1	21970.3	1.0781
19659.9	18140.1	1.08378		34680.7	24731.5	1.40229		21658.7	18825.9	1.15047		21314.4	20248.8	1.05263		40079.3	23916.7	1.67579
31673	21184.3	1.49511		34612	29688.8	1.16583		16324.7	13378.8	1.2202		32611.5	25323	1.28782		33421.3	32924.6	1.01509
20129.9	18009	1.11777		32410.6	24829.9	1.30531		18485.4	14446.9	1.27955		29049.4	20284.4	1.43211		37099.2	22999.6	1.61304
17466.5	14740.5	1.18493		32193.2	23006.8	1.39929		16687.3	15877.7	1.05098		25149.7	9727.83	2.58534		32794.3	31174	1.05198
18582.2	14907.4	1.24651		36061.8	23513.9	1.53364		17908.1	13254.9	1.35105		27730.4	15280.4	1.81477		38081.3	27464.3	1.38658
18868.6	18341.8	1.02873		29286.5	19134.6	1.53055		16408	18191	0.901989		32034.1	17554.1	1.82487		36741.8	23974.1	1.53257
21954	17639.3	1.24461		33341.9	17239	1.93409		29257	24597.6	1.18943		30344	21586.5	1.40569		23596.3	22549.1	1.04644
18097	17701.7	1.02233		30292.2	23211.4	1.30506		18735.1	17439.3	1.0743		22363.3	15571.8	1.43614		44914.2	29999.3	1.49718
16563.5	14198.6	1.16656		34527.6	22416	1.54031		18398.1	18014.8	1.02128		25281.5	16906.2	1.49539		37551.5	27447.6	1.36812
16277.8	15665.5	1.03909		31378.2	23135	1.35631		22474.1	22200.3	1.01234		28812	22628.2	1.27328		33168.9	23009.2	1.44155
15702.2	14178.7	1.10745		25728.4	27046.6	0.95126		18069.5	18132.1	0.996547		19905.6	16471.3	1.20851		38469.5	28348.6	1.35701
16791.6	12642.9	1.32815		31111.9	25626.1	1.21407		15157	17110.7	0.885822		31723.2	22275.1	1.42416		43559.7	27105.7	1.60703
16685	17927	0.930717		27573.6	19061.8	1.44654		17182.4	15795.9	1.08778		18335.4	18868.5	0.971744		20593.2	24635.8	0.835908
15845.6	12800.7	1.23787		34994.3	23105.9	1.51452		18902.2	16075.9	1.17581		30978.4	25604.4	1.20989		36086.3	26554	1.35898
17907	13872.9	1.29079		26821	21720.2	1.23484		19544.6	18218.5	1.07279		24858.8	31681.8	0.784639		58975.7	24124	2.44469
22128.7	13800.8	1.60344		32366.6	19276.2	1.6791		21330	13470.9	1.58342		18848.5	19252.4	0.979019		47974.4	29792.8	1.61027
20672.3	18949.3	1.09093		45595.5	29270.3	1.55774		18240.2	19027.6	0.958616		18783.7	22411.8	0.83812		42031.9	22738.4	1.8485
16604.3	13806.3	1.20266		26956.3	17433.2	1.54627		21776.6	17751.1	1.22677		22976.4	23725.1	0.968442		48340.9	28923.1	1.67136
16873.3	17173.5	0.982518		35255.3	23960.7	1.47138		19667	14247.2	1.38041						42684.1	30537.2	1.39777
17995.6	18304.7	0.983112		31913.8	26935.4	1.18483		21104.1	17934.5	1.17673						64023.5	36237.6	1.76677
				37287	28119.8	1.326										28577.3	27630.6	1.03426
				30356.8	26687.2	1.1375										33535	31135	1.07708
				26695.4	20395.2	1.30891										32320.3	28286.8	1.14259
				28922.6	20971	1.37917										50779	34710.6	1.46293
				32037.9	25428.1	1.25994
				27818.3	21456	1.29653
Ctl (Hsc70)				HS				1h				2h				3h
Inner intens/area	Outer intens/area	N/C (in/out)		Inner intens/area	Outer intens/area	N/C (in/out)		Inner intens/area	Outer intens/area	N/C (in/out)		Inner intens/area	Outer intens/area	N/C (in/out)		Inner intens/area	Outer intens/area	N/C (in/out)
7050.24	9580.79	0.735872		12287.1	7195.48	1.70762		7316.77	6185.5	1.18289		18415.8	9280.32	1.98439		26543	7380.2	3.59652
6281.04	9481.26	0.662469		12248.4	7777.99	1.57475		10145.3	4362.2	2.32573		9972.97	10794.8	0.923868		35568.5	8518.99	4.1752
2736.14	6123.46	0.446828		14804.5	8010.66	1.8481		12865.8	5636.27	2.28268		8545.72	8718.2	0.980216		31516	7394.68	4.26198
3347.77	7247.74	0.461905		10117.7	7933.8	1.27526		11908.7	5449.7	2.18521		16216.6	7115	2.27921		27343.9	7622.14	3.58743
3493.03	6991.91	0.499581		12035.5	6075.33	1.98105		7437.08	5533.65	1.34397		8107.95	9102.01	0.890786		21174.7	7844.46	2.69932
3845.84	6202.34	0.620062		11208.2	10214.5	1.09728		14117.9	5830.79	2.42126		7454.44	9751.05	0.764476		15201	10731.9	1.41643
2528.88	5736.13	0.440868		16721.2	7931.97	2.10808		12688.9	7255.95	1.74876		12474.4	10424.2	1.19667		18328.7	7323.61	2.50268
3306.88	10945.3	0.302128		12859.1	6280.73	2.04739		11404.4	4360.79	2.61521		13808.5	8875.95	1.55572		10639	8002.78	1.32941
3475	7788.82	0.446152		12178.5	13935.7	0.873908		9866.76	7138.48	1.38219		12037.9	8379.19	1.43664		10931.8	8745.99	1.24993
4325.95	11394.5	0.379651		10065.4	6340.82	1.5874		12210.5	4254.83	2.86979		15311.1	8656.35	1.76877		12089.9	3552.19	3.4035
3492.02	11205	0.311648		8437.04	4779.69	1.76519		10085.1	4296.5	2.34729		12509.4	9657.67	1.29528		10733.3	7500.84	1.43095
3470.63	8694.74	0.399164		11524.9	6197.37	1.85964		12134.3	5023.46	2.41553		11650.1	10318.7	1.12902		7381.39	7014.64	1.05228
4019.73	9431.28	0.426212		13225.5	6648.53	1.98924		11391.7	4016.1	2.8365		10857.2	12332.2	0.88039		25849.2	6337.25	4.07893
4952.19	14307.7	0.34612		10911.1	7173.46	1.52103		11082.8	4486.18	2.47044		15938	9901.64	1.60963		29048.7	6405.1	4.53524
3937.4	8373.43	0.470226		8036.37	7518.94	1.06882		9763.55	7357.29	1.32706		14775.8	9390.42	1.5735		13571.7	7030.82	1.93032
2930.75	8886.53	0.329796		9035.03	9488.85	0.952174		10342.7	4922.32	2.10119		19704.9	9547.06	2.06397		9782.54	5909.57	1.65537
2675.88	6948.19	0.385119		9193.91	6313.39	1.45626		11635.9	5288.07	2.2004		16592.8	7872.06	2.1078		16140.2	4448.21	3.62847
3078.98	8683.66	0.354572		10459.3	6139.66	1.70357		10919.8	5321.72	2.05194		13449.8	9810.6	1.37095		27962.6	7254.6	3.85447
5600.25	9424.76	0.594205		8534.95	7048.02	1.21097		11164.2	5255.81	2.12416		27243.5	8371.41	3.25435		20425.5	7558.44	2.70235
3306.76	10025.4	0.329839		9267.41	5879.25	1.57629		10772.3	4698.66	2.29264		21935	8567.74	2.56019		16997.4	4354.75	3.90319
2980.16	8526.26	0.349527		11131.5	7546.19	1.47512		9541.87	5922.41	1.61115		16634.9	7364.88	2.25867		16329.1	7396	2.20782
3427.4	10007.8	0.342473		8656.8	6032.09	1.43512		5428.34	5272.73	1.02951		23014.5	6456.14	3.56474		18988.7	7920.54	2.3974
2807.95	8769.96	0.320179		10360.5	7010.27	1.4779		13328.9	6332.95	2.1047		19915.7	12825.4	1.55283		30642.6	7892.32	3.88258
3223.41	8775.88	0.367304		10324.9	5691.34	1.81413		10060.4	9572.54	1.05097		19582.7	8704.32	2.24977		14770.8	6432.37	2.29632
2429.22	7163.99	0.339087		9198.32	7584.35	1.2128		11413.7	5013.29	2.2767		14028.6	6138.07	2.2855		15393.7	4768.16	3.22844
2070.74	4770.44	0.434077		11197.6	8205.1	1.36472		10810.1	5619.91	1.92354		18362.5	5351.3	3.43141		12731.9	7162.51	1.77758
2770.28	8416.69	0.329142		9618.34	6654.49	1.44539		12945.8	7849.32	1.64929		20404.2	7631.3	2.67376		18250.4	5708.54	3.19704
2661.97	6401.97	0.415805		8373.3	9414.97	0.889361		13433.7	7344.38	1.82911		13535.5	6802.66	1.98974		21383.6	7246.95	2.95071
1989.49	4750.98	0.418754		10822.2	8081.76	1.33909		14031.9	5827.77	2.40776		13903	8399.57	1.65521		19009.1	6441.42	2.95108
2021.65	6196.65	0.326249		10191.2	6239.03	1.63347		15751.3	6852.98	2.29846		13178.9	7992.9	1.64883		17846.6	5609.99	3.18122
2425.74	6526.97	0.371649		9527.29	6887.81	1.38321		9014.87	5384.4	1.67426		13516.2	7360.56	1.8363		14832.1	9585.48	1.54735
3032.01	6054.56	0.500782		10716.1	9316.73	1.1502		10623.6	4955.28	2.1439		13210.1	9976.24	1.32415		7702.56	7160.66	1.07568
4261.11	7696.57	0.553638		11458.5	5265.02	2.17634		7706.82	4908.61	1.57006		13879.9	8285.66	1.67517		16365.2	4090.4	4.00089
4821.7	14639.7	0.329358		12037.8	7383.93	1.63027		11840	6001.07	1.97298		12519.4	9524.1	1.31449		19590.3	6028.11	3.24983
2754.06	6409.04	0.429714		11688.9	7080.19	1.65092		8565.07	5638	1.51917		10178.9	10664.2	0.954492		25809.8	8692.98	2.96905
2991.39	7846.82	0.381223		11317.4	7511.74	1.50662		7203.83	4927.22	1.46205						27698.4	8152.32	3.39761
2903.99	8248.87	0.352048		8974.89	7963.97	1.12694		11747.2	5977.43	1.96525						25827.4	10977.4	2.35278
				13587.7	12552.1	1.0825										14726.6	14583.1	1.00984
				9772.71	10689.2	0.914264										29639.6	7658.6	3.87011
				7097.9	6997.81	1.0143										29823	9427.4	3.16344
				10828.6	8633.64	1.25424										29890.2	10192.7	2.93252
				8313.88	8109.91	1.02515
				9192.72	7058.75	1.30231

## Sheet: N over C
set 1	Ctl	HS	1h rec	2h rec	3h rec		set 2	Ctl	HS	1h rec	2h rec	3h rec		set 3	Ctl	HS	1h rec	2h rec	3h rec
BP1	1.1296	0.970836	0.840271	0.794091	0.836026		BP1	1.14493	1.1548	1.16382	0.896604	1.03267		BP1	1.15343	1.38108	1.18683	1.17466	1.37504
Hs70	0.506784	0.961467	1.55365	1.46304	2.22435		Hs70	0.509932	1.36713	2.19227	2.28282	3.48579		Hs70	0.419012	1.45368	1.97334	1.7726	2.79593
set 1	Ctl	HS	1h rec	2h rec	3h rec		set 2	Ctl	HS	1h rec	2h rec	3h rec		set 3	Ctl	HS	1h rec	2h rec	3h rec
BP1 Norm	1	0.859449	0.743865	0.702983	0.740107		BP1 Norm	1	1.00862	1.0165	0.783105	0.901948		BP1 Norm	1	1.19736	1.02896	1.0184	1.19213
Hsc70 Norm	1	1.89719	3.0657	2.8869	4.38915		Hsc70 Norm	1	2.68101	4.29915	4.47671	6.8358		Hsc70 Norm	1	3.46932	4.70952	4.23042	6.67269
Avg	Ctl	HS	1h rec	2h rec	3h rec
BP1	1	1.02181	0.929772	0.83483	0.944727
Hsc70	1	2.68251	4.02479	3.86468	5.96588
stdev BP1		0.169344	0.161121	0.163948	0.229026
stdev Hsc70		0.786063	0.855565	0.855684	1.36792
sterror BP1		0.0977707	0.0930233	0.0946552	0.132228
sterror Hsc70		0.453834	0.493961	0.49403	0.78977

## Sheet: Nuc only
set1	Inner intens/area	Norm	set2	Inner intens/area	Norm	set3	Inner intens/area	Norm
Ctl (BP1)	28824.4	1		31958.3	1		18460.9	1
Ctl (Hsc70)	10152.3	1		9816.88	1		3443.99	1
HS (BP1)	27554.7	0.95595		35800.5	1.12022		33175.3	1.79706
HS (Hsc70)	17949.3	1.76801		18343.4	1.86856		10640.5	3.08958
1h (BP1)	38051.2	1.3201		35967.6	1.12545		20260	1.09745
1h (Hsc70)	29678.6	2.92334		25157.5	2.56267		10883.8	3.16024
2h (BP1)	26932.5	0.934365		30116	0.942353		23638.8	1.28048
2h (Hsc70)	18955.6	1.86712		27123.9	2.76298		14939	4.33771
3h (BP1)	31835.1	1.10445		28821.5	0.901845		38054.3	2.06134
3h (Hsc70)	29161.5	2.8724		20721	2.11075		19865.4	5.76813
	Avg Norm	STDEV	SEM
Ctl	1	0	0
Ctl (Hsc70)	1	0	0
HS	1.29108	0.445823	0.257396
HS (Hsc70)	2.24205	0.735701	0.424757
1h	1.181	0.121277	0.0700191
1h (Hsc70)	2.88208	0.300912	0.173732
2h	1.0524	0.197562	0.114063
2h (Hsc70)	2.98927	1.25074	0.722118
3h	1.35588	0.619291	0.357548
3h (Hsc70)	3.58376	1.92967	1.1141

## Sheet: Cyt only
set1	Outer intens/area	Norm	set2	Outer intens/area	Norm	set3	Outer intens/area	Norm
Ctl (BP1)	25579	1		28512	1		16210.7	1
Ctl (Hsc70)	20198.2	1		19676.6	1		8342.6	1
HS (BP1)	28607.8	1.11841		31292.2	1.09751		24399.4	1.50514
HS (Hsc70)	18976.2	0.939495		14034.3	0.713246		7599.87	0.910972
1h (BP1)	45974.5	1.79735		32617.1	1.14398		17277	1.06578
1h (Hsc70)	19628.2	0.97178		12255.4	0.622839		5677.69	0.680566
2h (BP1)	34407.6	1.34515		35297.9	1.238		21007	1.29587
2h (Hsc70)	13236.3	0.655319		13063.2	0.663895		8866.97	1.06286
3h (BP1)	38697.9	1.51288		28266.8	0.9914		27654.3	1.70593
3h (Hsc70)	13662.1	0.676403		6511.22	0.330912		7416.07	0.888941
	Avg Norm	STDEV	SEM
Ctl	1	0	0
Ctl (Hsc70)	1	0	0
HS	1.24035	0.22955	0.132531
HS (Hsc70)	0.854571	0.123219	0.0711408
1h	1.3357	0.401708	0.231926
1h (Hsc70)	0.758395	0.187037	0.107986
2h	1.29301	0.0536317	0.0309643
2h (Hsc70)	0.794023	0.232855	0.134439
3h	1.4034	0.36963	0.213406
3h (Hsc70)	0.632085	0.281642	0.162606
