# Supplementary material for: Quantitative analysis of the interplay between hsc70 and its co-chaperone HspBP1
Source: PeerJ. 2015 Dec 21;3:e1530. doi: 10.7717/peerj.1530 (PMC4690350; doi:10.7717/peerj.1530)
Supplement: Supplemental Information 2 [file peerj-03-1530-s002.xlsx]

## Sheet: Stats
	Ctl (BP1)				HS				1h				2h				3h
	Inner intens/area	Outer intens/area	N/C (in/out)		Inner intens/area	Outer intens/area	N/C (in/out)		Inner intens/area	Outer intens/area	N/C (in/out)		Inner intens/area	Outer intens/area	N/C (in/out)		Inner intens/area	Outer intens/area	N/C (in/out)
	23024.4	23859.4	0.965003		27890.2	40612.7	0.686735		32289.2	34514.6	0.935523		22285	40585	0.549094		42571.4	36954.9	1.15198
	30209.2	29684.8	1.01767		55524.4	43764.6	1.26871		33080.7	35101.4	0.942433		20326.4	24505.2	0.829472		29028.1	31703.8	0.915604
	37618	34702	1.08403		40651.5	37823.9	1.07476		30059	28895.2	1.04027		23767.2	25496.2	0.932186		24475	25107.2	0.974819
	38269.1	38372.9	0.997295		38318.3	39108.7	0.97979		23163.2	31101.8	0.744756		19799.9	31000.5	0.638696		21518.3	28870.5	0.745339
	31267.5	33784.7	0.925493		46324	37357.3	1.24003		24538	28940.2	0.847887		34115.9	14964	2.27986		26502.2	28535.5	0.928745
	33954.5	24223.7	1.40171		41060.9	39621.5	1.03633		26988	28137.9	0.959131		27054.4	23358.2	1.15824		26981.2	30605.6	0.881576
	28299.9	24702.3	1.14564		47221.3	36619.7	1.2895		26156.1	30410.8	0.860095		21729.9	21438.4	1.0136		39255.2	29809.6	1.31686
	23611.1	22474	1.0506		40413.5	37108.8	1.08905		34032.3	30016	1.1338		15027.4	27362	0.549207		41335.6	22176.2	1.86396
	32536.3	27766.5	1.17178		32957.1	30397.2	1.08421		28594.3	18722.8	1.52725		21745.6	27310.5	0.796237		23171.8	30017	0.771956
	31228.4	30504.3	1.02374		35332.4	31072.1	1.13711		27416	23517.2	1.16579		20528.9	33715.1	0.608892		26985.1	28515.5	0.94633
	25705.2	29127.7	0.882501		37362.9	30762.2	1.21457		28629.9	36251.1	0.789768		29456	27249.2	1.08098		29135.8	34028	0.856231
	32481	36000.2	0.902245		43822.2	32041.2	1.36768		71234.2	59750.8	1.19219		25398.6	40433.9	0.628152		32383.8	32383.6	1.00001
	33584.9	21770	1.54271		44487.6	31948.7	1.39247		41600.4	11365.6	3.6602		33052.9	38098.1	0.867575		33812.9	44824	0.754349
	32524.2	31070.5	1.04679		35687.1	28378.6	1.25754		23684.2	20720	1.14306		34576.4	38566.6	0.896537		46155.4	29329.4	1.57369
	29847.9	26327.1	1.13373		33795.1	31344.2	1.07819		27875.1	21534.4	1.29445		40347.1	40492	0.996422		32329.2	36994.5	0.873891
	24684	22875.3	1.07907		43469.9	39803.2	1.09212		39779	30993.1	1.28348		20881.5	27143.6	0.769295		19221.1	18937.1	1.015
	17905.8	14021.4	1.27704		23709.4	25632.5	0.924975		37321	23631.6	1.57928		26515.9	40561.1	0.653727		26452.5	23270.4	1.13674
	20142.5	16433.3	1.22571		36091.7	26510.6	1.36141		42241.8	27968	1.51036		28436.8	31407.9	0.905405		24774.2	27691	0.894666
	33397.9	26144.4	1.27744		20497	15157.4	1.35227		35944.4	28726.1	1.25128		20425.3	32500.9	0.628453		35199.6	28167.9	1.24964
	29397.6	22055.4	1.3329		39676.8	26557.8	1.49398		47033.1	41694.8	1.12803		30273	37596	0.805217		38048.8	33322.4	1.14184
	16299.7	13259.6	1.22928		20742.6	26336.6	0.787595		32890.9	41011.3	0.801995		34450.2	22479.8	1.5325		23590.4	18460.8	1.27787
	38074.8	33455.1	1.13809		24409.8	20281.2	1.20357		42332.4	42608.7	0.993515		19694.8	29323.3	0.671642		36459.8	34465.1	1.05788
	29544.5	36034.7	0.819889		38983.9	36101.2	1.07985		35488	33291.4	1.06598		34707.1	29359.1	1.18216		24651.2	29251.8	0.842726
	35125.4	39074.7	0.898931		42265.2	34570.9	1.22257		43833.3	44383.6	0.987602		38979	37895.9	1.02858		30668.1	35109.8	0.87349
	38182.9	30736.1	1.24228		27357.2	26884.8	1.01757		46082.3	35591.3	1.29477		25841.7	33237.2	0.777493		23085.9	30983.6	0.745101
	40383	32282.1	1.25094		40338.4	26908.8	1.49908		57536.1	35903.5	1.60252		28859.1	34642	0.833065		18123.1	19297.4	0.939148
	42388.7	28612.5	1.48147		41291.4	30825.6	1.33952		31355.1	37042.2	0.846469		61641.9	51526.7	1.19631		17156	17804.5	0.963575
	37404.6	32602.4	1.14729		28976.1	25544.7	1.13433		38164.7	40805.8	0.935277		44069.3	44976.3	0.979833		30414.5	35561.7	0.85526
	37153.1	31880.7	1.16538		27872.9	30116.3	0.925509		35011.8	36616.3	0.95618		57077.9	62836	0.908363		25205.3	30817.7	0.817884
	35240.2	37636.4	0.936334		38727.2	29383.2	1.318		38715.4	33731.4	1.14776		37844.5	50825.5	0.744596		21573.2	30965.1	0.696694
	34180.7	33344.1	1.02509		29134.6	23486.1	1.2405		42058.4	35962.2	1.16951		30898.3	47087.9	0.656182		23535.5	25689.2	0.916166
	34421.7	24789.5	1.38856		34346.4	32811.1	1.04679		31844.9	28378.4	1.12215		33934.6	49016.2	0.692314		26251.5	25843.8	1.01578
	39820.6	31537.8	1.26263		36778.8	37507.4	0.980573		35242.1	35896.7	0.981765		29523.6	55800.6	0.52909		29920.4	30185.1	0.991232
	33043.9	31929	1.03492		30917.7	28492.1	1.08513		34641.7	36365.3	0.952603		28416	45071.1	0.63047		17704.2	19538.7	0.90611
	27401	27129.2	1.01002		41645.4	29511	1.41118		36752.4	33879	1.08482		33801.8	22786.5	1.48341		15922.7	17779.1	0.895585
	30229.5	26991	1.11998		30623.6	35487.9	0.862931		35478.5	34802	1.01944		29844	44720.2	0.667349		17815.4	16213.6	1.0988
	34172.9	30394.7	1.1243		35148.7	32891.5	1.06863		31711.5	28569.6	1.10997		43947.9	50937.4	0.862784		30848.6	23713.9	1.30087
	36671.9	26938.1	1.36134		31778.3	25419.6	1.25015						29706	37014.5	0.802552		20848.8	18295.2	1.13958
	35453.2	19344.6	1.83271		31329.8	29508.6	1.06172						39085.9	31341.2	1.24711		26021.8	15870.8	1.6396
	34472	31456.3	1.09587		36057.7	29807.3	1.20969						33699.7	36833.3	0.914924		22148.6	27821.2	0.796105
	28198.3	24329.6	1.15901		34801	29482.1	1.18041						31657	36260.9	0.873032		33220.7	32292.3	1.02875
	35041.2	30972.3	1.13137										37402.6	47144.6	0.793359		20762.8	21460.9	0.967473
	31615	35387	0.893407										447.648	459.95	0.973254		34654.5	29390.3	1.17912
													26265.2	26132.1	1.00509		19864.9	20148.8	0.985911
													27407.5	40656.2	0.674129		27725.6	22592.6	1.2272
													33653.5	27980.2	1.20276		19232.8	24455	0.786457
													26852.9	38872.4	0.690797		50409	39221.3	1.28524
																	33847.3	31236.7	1.08357
																	32554.7	34573	0.941623
																	44179.3	34327.6	1.28699
																	39464.5	34314.1	1.15009
																	41517.3	40950.9	1.01383

## Sheet: set1 data
Ctl (BP1)						HS						1h						2h						3h
Inner intens/area	Inner Norm Avg	Outer intens/area	Outer Norm Avg	N/C (in/out)	N/C Norm Avg	Inner intens/area	Inner Norm Avg	Outer intens/area	Outer Norm Avg	N/C (in/out)	N/C Norm Avg	Inner intens/area	Inner Norm Avg	Outer intens/area	Outer Norm Avg	N/C (in/out)	N/C Norm Avg	Inner intens/area	Inner Norm Avg	Outer intens/area	Outer Norm Avg	N/C (in/out)	N/C Norm Avg	Inner intens/area	Inner Norm Avg	Outer intens/area	Outer Norm Avg	N/C (in/out)	N/C Norm Avg
28854.8	1.00106	27244.2	1.0651	1.05912	0.937601	22127.4	0.767663	27148.5	1.06136	0.81505	0.721537	27028.1	0.937683	34562.9	1.35122	0.781999	0.692278	26040.1	0.903405	35222.5	1.37701	0.739302	0.65448	27403.4	0.950701	32060.1	1.25337	0.854749	0.756682
23604.5	0.818906	22599	0.883498	1.04449	0.924653	24073.6	0.835181	27840.1	1.08839	0.864709	0.765499	36690.2	1.27289	35733.6	1.39699	1.02677	0.908966	24762.4	0.859077	35665.7	1.39433	0.694291	0.614633	47076.4	1.63321	48127.2	1.88151	0.978166	0.865939
27139	0.941528	23544.8	0.920473	1.15265	1.0204	21489.9	0.745545	26357.1	1.03042	0.815336	0.72179	39014.8	1.35354	39282.7	1.53574	0.993179	0.879229	28452.1	0.987086	30624.1	1.19724	0.929075	0.82248	46450.9	1.61151	70913.7	2.77234	0.655034	0.57988
24454.1	0.848384	22444.7	0.877465	1.08953	0.964524	29760.3	1.03247	30128.8	1.17787	0.987769	0.87444	36439.8	1.2642	42916.5	1.6778	0.849086	0.751668	25646.2	0.889739	27413.4	1.07171	0.935534	0.828198	31581	1.09564	51162	2.00015	0.617275	0.546453
34809.8	1.20765	32566.8	1.27318	1.06887	0.946239	20285.7	0.703769	26162.1	1.0228	0.775384	0.686422	33580.2	1.16499	39242.3	1.53416	0.855715	0.757537	26582.4	0.922219	33353.7	1.30395	0.796986	0.705546	45886.4	1.59193	55143.3	2.1558	0.83213	0.736658
27670.1	0.959955	26207.7	1.02458	1.0558	0.934667	31392.9	1.08911	36347	1.42097	0.8637	0.764605	41131.4	1.42697	35857.1	1.40182	1.14709	1.01548	26283	0.911832	47440.6	1.85467	0.554019	0.490455	34215.4	1.18703	45491.5	1.77847	0.752127	0.665833
28696.2	0.995553	19156.6	0.748916	1.49798	1.32612	30286.1	1.05071	29662	1.15962	1.02104	0.903894	37765	1.31017	48869.5	1.91053	0.772772	0.68411	25715	0.892128	37506.7	1.46631	0.685611	0.606949	30773.2	1.06761	26698.8	1.04378	1.15261	1.02036
24124.7	0.836956	21138.2	0.826389	1.14128	1.01034	27570.5	0.9565	30619.4	1.19705	0.900426	0.797118	34055.4	1.18148	40909.5	1.59934	0.832456	0.736946	28179.5	0.977628	34603.5	1.35281	0.814354	0.720921	28332	0.98292	29494.8	1.15309	0.960576	0.850367
31522	1.09359	24700.3	0.965646	1.27618	1.12976	24924.2	0.864691	26837.5	1.0492	0.928707	0.822154	41844.1	1.45169	52632	2.05762	0.795031	0.703815	32247.7	1.11876	42589.6	1.66502	0.757172	0.6703	26210.5	0.909317	44257.2	1.73021	0.592231	0.524283
31911.2	1.10709	27765.6	1.08548	1.14931	1.01744	34052.7	1.18139	35819.9	1.40036	0.950665	0.841593	35092.6	1.21746	50607.6	1.97848	0.693426	0.613867	28597.8	0.992141	38911.2	1.52121	0.734952	0.650629	26834.5	0.930965	29642.4	1.15886	0.905272	0.801408
24956.3	0.865804	23687.4	0.926048	1.05357	0.932688	28950.9	1.00439	27668.7	1.08169	1.04634	0.926292	32318.2	1.12121	35600.6	1.39179	0.907801	0.803646	29682.3	1.02976	32106.3	1.25518	0.924498	0.818428	21615.9	0.749917	28483.2	1.11354	0.758899	0.671829
17384.5	0.603118	18320.9	0.716248	0.948888	0.840019	29160.4	1.01166	30782	1.20341	0.947318	0.83863	39201.5	1.36001	40474.4	1.58232	0.968552	0.857427	25372.3	0.880238	26048.6	1.01836	0.974037	0.862283	38387.6	1.33178	40136.5	1.56912	0.956427	0.846693
29219.3	1.0137	30460.7	1.19085	0.959247	0.84919	31889	1.10632	31098.2	1.21577	1.02543	0.907778	38255.6	1.32719	43652.4	1.70657	0.876368	0.77582	32038	1.11149	43069.3	1.68377	0.743871	0.658524	21113.4	0.732483	24060.9	0.940647	0.877499	0.776821
21437.4	0.743723	22023	0.860976	0.97341	0.861728	29028.1	1.00707	28236.9	1.10391	1.02802	0.91007	43713.3	1.51654	51333.8	2.00687	0.85155	0.753849	37080.6	1.28643	39485.6	1.54367	0.939092	0.831348	24043.6	0.83414	33033.8	1.29144	0.727848	0.64434
28951	1.00439	24281.8	0.949285	1.19229	1.0555	25333.5	0.87889	22198.9	0.867853	1.14121	1.01027	29310	1.01685	39595.2	1.54796	0.740241	0.655312	31149.9	1.08068	48349.6	1.8902	0.644263	0.570345	41265	1.4316	42521.7	1.66236	0.970445	0.859103
23126	0.802307	22722.3	0.888316	1.01777	0.900997	24993.8	0.867107	26504.7	1.03619	0.942995	0.834802	33318.6	1.15592	39726.8	1.5531	0.838693	0.742468	28909.5	1.00295	36672.4	1.43369	0.788319	0.697873	30145	1.04582	46918.7	1.83427	0.642494	0.568779
27890.5	0.967602	24626.4	0.962758	1.13254	1.0026	29893.3	1.03708	27872.8	1.08967	1.07249	0.949441	38448.1	1.33388	38375.6	1.50028	1.00189	0.88694	43207.2	1.49898	35043.8	1.37002	1.23295	1.09149	30990.8	1.07516	30505.7	1.1926	1.0159	0.899346
23881.8	0.828527	18879.6	0.738089	1.26495	1.11982	27295.1	0.946945	27704.2	1.08308	0.985232	0.872194	37382.2	1.2969	49746.8	1.94483	0.751449	0.665234	22820.1	0.791693	36852.2	1.44072	0.619232	0.548185	31247.1	1.08405	40482	1.58262	0.771878	0.683318
22487.3	0.780149	19097.4	0.746603	1.17751	1.04241	25328.7	0.878723	28380.5	1.10952	0.892466	0.790071	40676.4	1.41118	42955	1.6793	0.946955	0.838308	20529.2	0.712217	37377.7	1.46126	0.549237	0.486221	37611	1.30483	37086.5	1.44988	1.01414	0.897787
26544.9	0.920919	22795.2	0.891169	1.16449	1.03089	26165	0.907737	30695.9	1.20004	0.852394	0.754597	48220.2	1.6729	52565.5	2.05502	0.917336	0.812088	26598.4	0.922775	34443.3	1.34654	0.772239	0.683638	28488.8	0.988357	43842.2	1.71399	0.649803	0.575249
30506.1	1.05834	24784.9	0.968954	1.23083	1.08962	35130	1.21876	36859.5	1.441	0.953078	0.843729	34346.6	1.19158	36380.6	1.42228	0.944093	0.835774	32899.3	1.14137	32649.2	1.2764	1.00766	0.892048	24004.4	0.832782	25795.9	1.00848	0.93055	0.823785
30053.3	1.04263	26114	1.02091	1.15085	1.01881	35494.2	1.2314	33088.3	1.29357	1.07271	0.949639	34632.1	1.20149	43368.5	1.69547	0.798554	0.706934	27953.5	0.969788	36035.8	1.4088	0.775716	0.686716	26096.7	0.905371	28842.9	1.1276	0.90479	0.800981
30395.7	1.05451	25592.3	1.00052	1.18769	1.05142	30132.1	1.04537	37951.1	1.48368	0.79397	0.702876	27701.3	0.961037	35607.6	1.39206	0.777959	0.688702	28114.3	0.975366	42916.2	1.67779	0.655099	0.579938	27765.2	0.963255	34763.7	1.35907	0.798684	0.707049
26826.6	0.930693	24370.6	0.952757	1.10078	0.974483	27254.8	0.945547	26912.3	1.05212	1.01273	0.896533	34315.4	1.1905	45989.4	1.79793	0.74616	0.660551	25676.5	0.890792	39997.4	1.56368	0.641955	0.568302	40806.4	1.41569	35584.2	1.39115	1.14676	1.01519
31661.7	1.09844	28499.8	1.11418	1.11095	0.983486	30825.8	1.06943	37952.3	1.48373	0.812223	0.719035	41095.3	1.42571	54566.3	2.13324	0.753126	0.666718	27087.3	0.939734	27689	1.08249	0.978269	0.86603	32259.4	1.11917	41037.8	1.60435	0.786091	0.695901
29687.7	1.02995	24303.8	0.950143	1.22153	1.08138	24542.1	0.851435	25901.1	1.01259	0.947532	0.838819	37769.3	1.31032	51268.6	2.00432	0.736695	0.652172	25781	0.894416	27658.9	1.08131	0.932106	0.825163	38349.3	1.33045	47642.7	1.86257	0.804936	0.712583
28266.1	0.980631	29719.5	1.16187	0.951095	0.841973	28886.6	1.00216	22949.6	0.897204	1.2587	1.11428	43976.8	1.52568	48675.7	1.90295	0.903465	0.799808	29043.2	1.00759	34594.7	1.35246	0.839525	0.743204	32453.9	1.12592	38884.6	1.52017	0.834621	0.738863
24834.9	0.861593	24385.4	0.953336	1.01843	0.901584	29923.4	1.03813	26210.6	1.02469	1.14165	1.01067	39022.4	1.3538	52034.7	2.03427	0.749931	0.663889	28071.2	0.97387	31813.9	1.24375	0.882356	0.781121	29368.5	1.01888	37559.9	1.46838	0.781911	0.6922
30327.5	1.05215	26268.9	1.02697	1.1545	1.02204	25055.3	0.869239	26726.5	1.04486	0.93747	0.829912	41508.3	1.44004	48747.8	1.90577	0.85149	0.753796	19874.7	0.689508	28863.8	1.12841	0.688567	0.609566	31006.8	1.07571	44020.2	1.72095	0.704376	0.623561
24718	0.857538	22631.1	0.88475	1.09222	0.966903	28572.6	0.991264	24093.1	0.941908	1.18592	1.04986	50871.8	1.76489	58830.7	2.29996	0.864716	0.765505	23448.7	0.813503	37143.9	1.45212	0.631294	0.558864	40860.3	1.41756	47416	1.85371	0.861741	0.762871
33002	1.14493	27282.6	1.0666	1.20964	1.07085	30889.7	1.07165	23534.5	0.920069	1.31253	1.16194	40093	1.39094	75564.2	2.95414	0.530583	0.469707	19101.2	0.662676	28571.9	1.117	0.668531	0.591829	32793.2	1.13769	43579.1	1.7037	0.752499	0.666162
36559.3	1.26835	31657.3	1.23763	1.15485	1.02235	26026.5	0.902933	30959.8	1.21036	0.840654	0.744203	35708.1	1.23882	54998.1	2.15012	0.649261	0.574769	30101.1	1.04429	32969.1	1.28891	0.913011	0.808259	37547.2	1.30262	36802.2	1.43876	1.02025	0.90319
33526.5	1.16313	27739.3	1.08445	1.20863	1.06996	21357.8	0.740963	21725.2	0.849337	0.983088	0.870295	35734.9	1.23975	38692.5	1.51267	0.923561	0.817598	29116.2	1.01013	35058.1	1.37058	0.830515	0.735228	22681.8	0.786895	34750.4	1.35855	0.652705	0.577818
34499.5	1.19689	32525	1.27155	1.06071	0.93901	28428.7	0.986274	28004.3	1.09482	1.01515	0.898683	44968.3	1.56008	47246.8	1.84709	0.951774	0.842575	45765.1	1.58772	29049.9	1.13569	1.5754	1.39465	32270.2	1.11955	40156	1.56988	0.803621	0.711419
29410.2	1.02032	26166	1.02295	1.12399	0.995029	23853	0.827527	25752.3	1.00677	0.926247	0.819976	44548	1.5455	59265.3	2.31695	0.75167	0.665429	31178.8	1.08168	37661.7	1.47236	0.827865	0.732882	27096.4	0.94005	39311.9	1.53688	0.689266	0.610185
36071.7	1.25143	28904.6	1.13001	1.24795	1.10477	18231	0.632486	23871.3	0.933238	0.76372	0.676096	39623.7	1.37466	43688.6	1.70799	0.906956	0.802899	19749.8	0.685177	33545.8	1.31146	0.588741	0.521193	24525.6	0.850863	33809.5	1.32177	0.725406	0.642178
37636.5	1.30572	30132.5	1.17802	1.24903	1.10573	30918.3	1.07264	27933.1	1.09203	1.10687	0.979875	35009.9	1.21459	40602	1.58731	0.862272	0.763341	20608.7	0.714973	29262	1.14398	0.704281	0.623477	39770.3	1.37974	41426.6	1.61955	0.960018	0.849873
32133.2	1.11479	29019.9	1.13452	1.10728	0.98024							49237.2	1.70818	50126.1	1.95965	0.982268	0.86957	23565.8	0.817566	31769.6	1.24202	0.741773	0.656667	26541.6	0.920803	27659.7	1.08134	0.959577	0.849482
31618.2	1.09693	29151.4	1.13966	1.08462	0.960181							34580.1	1.19968	49814.5	1.94747	0.694177	0.614532	20539	0.712556	23382.9	0.914142	0.878377	0.777598	20019	0.694517	37542.5	1.46771	0.533236	0.472056
32575.2	1.13013	29650.3	1.15917	1.09865	0.972595							33958.3	1.17811	49910.8	1.95124	0.680381	0.602319	17374.9	0.602783	29324.9	1.14644	0.592494	0.524516	35319.5	1.22534	35971.1	1.40627	0.981888	0.869233
												37912	1.31528	44936.9	1.75679	0.843672	0.746876	20620	0.715366	36184.6	1.41462	0.569855	0.504474	35162.4	1.21988	39118.7	1.52933	0.898863	0.795734
																		20945.6	0.726664	32401.7	1.26673	0.646436	0.572268	27990.1	0.971056	36374.1	1.42203	0.769506	0.681219
																		20436.8	0.70901	29601	1.15723	0.69041	0.611197	34547.8	1.19856	35899.9	1.40349	0.962337	0.851925
																		28083	0.974279	33009.7	1.2905	0.850749	0.75314
Ctl (Hsc70)						HS						1h						2h						3h
Inner intens/area		Outer intens/area		N/C (in/out)		Inner intens/area		Outer intens/area		N/C (in/out)		Inner intens/area		Outer intens/area		N/C (in/out)		Inner intens/area		Outer intens/area		N/C (in/out)		Inner intens/area		Outer intens/area		N/C (in/out)
8555.96	0.842761	15882.8	0.786348	0.538692	1.06296	15236.8	1.50082	15634.1	0.774031	0.974589	1.92309	28688.6	2.82582	13176.1	0.652341	2.17731	4.29634	16032.5	1.57919	13169.7	0.652021	1.21738	2.40216	36213.7	3.56704	12831.6	0.635285	2.82222	5.56887
7049.1	0.694335	14866.1	0.736008	0.474173	0.935652	14924.8	1.47009	22131.6	1.09572	0.674366	1.33068	30838.1	3.03755	12614.5	0.624535	2.44465	4.82385	18331.1	1.80561	10937.9	0.541526	1.67593	3.30699	39060.5	3.84745	16490.2	0.816419	2.36871	4.67399
7912.18	0.779348	16026.3	0.793451	0.493699	0.97418	15939.3	1.57002	17029.8	0.843132	0.935965	1.84687	26545.7	2.61475	19193.6	0.95026	1.38305	2.72907	20133.2	1.98312	10900.6	0.539681	1.84698	3.64451	32728.9	3.22379	26640.8	1.31896	1.22853	2.42416
7046.91	0.694119	14309.2	0.708438	0.492474	0.971762	20004.2	1.97041	22523.8	1.11514	0.888137	1.7525	32861.8	3.23688	20876.5	1.03358	1.57411	3.10607	21682	2.13568	13511.9	0.668964	1.60466	3.16636	31767.9	3.12914	17687.9	0.875717	1.79602	3.54396
10102.1	0.995054	16515	0.817644	0.611693	1.20701	11754.1	1.15777	16727.4	0.828162	0.702682	1.38655	20636.2	2.03266	14988.2	0.742052	1.37683	2.7168	20046.9	1.97462	11657.5	0.577154	1.71966	3.39328	27833.4	2.74159	15382.5	0.761574	1.80942	3.57041
7786.34	0.766954	16194.4	0.80177	0.480806	0.948739	19928.5	1.96296	23049.8	1.14118	0.864587	1.70603	33502.4	3.29998	15000.1	0.742642	2.23348	4.40717	20530.6	2.02226	17401.6	0.861541	1.17981	2.32803	40648	4.00382	14725	0.729026	2.76046	5.44702
10754.4	1.05931	15168.2	0.750968	0.709009	1.39904	17627.3	1.73629	21256.9	1.05241	0.829252	1.6363	40750.5	4.01392	21716.8	1.07518	1.87645	3.70265	17727.9	1.74619	12572.5	0.622455	1.41005	2.78236	38746.8	3.81656	11616.7	0.575134	3.33544	6.58159
7198.93	0.709093	13264.8	0.656731	0.542709	1.07089	17168.5	1.6911	25805.9	1.27763	0.665295	1.31278	40131.3	3.95293	19291.5	0.955108	2.08026	4.10482	21038.7	2.07231	15693.6	0.77698	1.34059	2.64529	29224.7	2.87863	14412.4	0.713549	2.02774	4.0012
12163.1	1.19806	23987.5	1.1876	0.507059	1.00054	14829.3	1.46069	16238.3	0.803944	0.913233	1.80202	28068.5	2.76474	20892.5	1.03437	1.34347	2.65098	34599.1	3.40801	15741.1	0.77933	2.19801	4.33717	26985.6	2.65808	11299.9	0.559449	2.38813	4.71233
12144	1.19618	26190.2	1.29666	0.463686	0.914958	20510	2.02023	20460	1.01296	1.00245	1.97805	26848.8	2.6446	20912.8	1.03538	1.28384	2.53331	21975	2.16454	16764.3	0.829987	1.31082	2.58655	30559.4	3.01009	10534.9	0.521574	2.90078	5.7239
10147.1	0.999492	18208.7	0.901498	0.557269	1.09962	15580.1	1.53464	16682.8	0.825951	0.933907	1.84281	38358.4	3.7783	14232	0.704615	2.69523	5.3183	15557.5	1.53241	17504	0.866612	0.888794	1.75379	20749	2.04378	10208.7	0.505425	2.03249	4.01056
6648.69	0.654895	14618.6	0.723755	0.454811	0.897446	18497.3	1.82198	25175.6	1.24643	0.73473	1.44979	35849.1	3.53113	19833.4	0.981936	1.80751	3.56663	18461.7	1.81847	12018.8	0.595041	1.53607	3.03101	33606.3	3.31022	13311.7	0.659053	2.52457	4.98155
11351.3	1.1181	21695	1.0741	0.523223	1.03244	19723.6	1.94277	20003	0.990335	0.98603	1.94566	27751.6	2.73353	16555.1	0.819631	1.67632	3.30775	24827.7	2.44552	20464	1.01316	1.21324	2.394	17201	1.69429	8503.05	0.42098	2.02292	3.99168
9234.97	0.909644	19361	0.958548	0.476989	0.941208	16074	1.58328	18727.5	0.927187	0.858306	1.69363	23981.2	2.36215	19103.5	0.945802	1.25533	2.47705	27367.1	2.69565	14736.7	0.729605	1.85706	3.66441	31387.5	3.09166	10755.6	0.5325	2.91826	5.75838
11597.5	1.14235	19299.8	0.955517	0.600912	1.18574	21130.4	2.08134	16394.5	0.811679	1.28887	2.54323	24114.2	2.37524	17845.8	0.883534	1.35125	2.66632	19711.7	1.9416	21395.4	1.05927	0.921305	1.81794	39081.2	3.8495	10046.3	0.497386	3.8901	7.67606
10869.6	1.07065	18881.2	0.934792	0.575684	1.13596	21397.3	2.10763	20105.9	0.995431	1.06423	2.09996	29091.4	2.8655	14272.7	0.706629	2.03826	4.02194	21338	2.10179	21064.5	1.04289	1.01299	1.99885	30996.6	3.05317	15608.9	0.772786	1.98583	3.91849
10399	1.0243	20030	0.991671	0.519169	1.02444	24878.5	2.45053	20951.5	1.0373	1.18743	2.34307	33649.1	3.31443	19868.4	0.98367	1.6936	3.34185	28013.6	2.75934	20461.6	1.01304	1.36908	2.70151	35381.4	3.48506	14772.1	0.731356	2.39515	4.72617
11051.1	1.08853	20224	1.00127	0.546437	1.07824	18374.4	1.80988	19986.9	0.989539	0.919319	1.81403	32008.2	3.15281	20165.8	0.998394	1.58725	3.13201	14191.8	1.39789	8751	0.433256	1.62174	3.20006	38199.4	3.76263	16973	0.840321	2.25059	4.44093
10436.7	1.02801	18578.1	0.919788	0.561772	1.1085	12243.7	1.206	15848.6	0.784651	0.772543	1.5244	33285.4	3.27861	18400.4	0.910991	1.80895	3.56947	14612.5	1.43933	9917.2	0.490993	1.47345	2.90744	28481.4	2.80542	14246.8	0.705351	1.99914	3.94476
10217.3	1.0064	20119.8	0.996118	0.507822	1.00205	12344.3	1.21592	17547.7	0.868774	0.703473	1.38811	27543.8	2.71306	20698.4	1.02476	1.33072	2.62581	22005.1	2.1675	10220.2	0.505996	2.15309	4.24854	34883.4	3.43601	13561.5	0.67142	2.57224	5.07561
9858.68	0.971079	20211.1	1.00064	0.487786	0.962512	27676.8	2.72616	28983.5	1.43495	0.954914	1.88426	27592.5	2.71786	16290.8	0.806545	1.69375	3.34215	21304.4	2.09848	8789.2	0.435147	2.42393	4.78297	20071.2	1.97701	8478.32	0.419755	2.36735	4.67132
9619.01	0.947471	19042.9	0.942801	0.505122	0.996721	26237.5	2.58439	23350.6	1.15607	1.12363	2.21718	20588.4	2.02795	20804.1	1.03	0.98963	1.95276	24101.8	2.37402	13755.6	0.68103	1.75214	3.45738	30285.6	2.98313	12799.8	0.633707	2.3661	4.66886
9615.28	0.947104	20696.6	1.02467	0.464582	0.916726	23361.4	2.3011	27694.9	1.37115	0.843527	1.66447	20198.4	1.98954	14430.7	0.714454	1.39968	2.76189	19360.3	1.90699	12833	0.635352	1.50864	2.97688	20885.7	2.05724	11766.9	0.582573	1.77495	3.50237
10431.7	1.02753	23033.7	1.14038	0.45289	0.893655	14551.4	1.43331	15872.2	0.785819	0.916789	1.80903	27013.4	2.66082	19567.1	0.968753	1.38055	2.72415	13852.5	1.36447	11359.6	0.562407	1.21945	2.40626	33139.9	3.26428	13737.3	0.680125	2.4124	4.76021
10286.6	1.01323	21877.3	1.08313	0.470196	0.927804	15598.4	1.53644	20326.7	1.00636	0.767384	1.51422	26998.5	2.65935	21679.9	1.07336	1.24532	2.4573	16965.8	1.67113	13011.7	0.644201	1.30388	2.57286	27163.3	2.67558	12199.7	0.604	2.22655	4.39348
11195	1.10271	23297.4	1.15344	0.480526	0.948187	20530.3	2.02223	17585.2	0.870628	1.16748	2.3037	28702.5	2.82719	24478	1.21189	1.17258	2.31377	16189.9	1.5947	12302.7	0.609099	1.31596	2.59669	27375.1	2.69644	16290.9	0.806551	1.68039	3.31579
9416.64	0.927538	22616.4	1.11972	0.416363	0.82158	17352	1.70917	13814.5	0.683945	1.25608	2.47853	28270.3	2.78462	18174.4	0.8998	1.5555	3.06936	15971.7	1.57321	11654.5	0.577007	1.37043	2.70417	35883.8	3.53455	13488.9	0.667823	2.66025	5.24929
8339	0.821391	19938.7	0.987148	0.418233	0.825269	19333.2	1.90432	16250.2	0.804534	1.18972	2.3476	37415.2	3.6854	26352.2	1.30468	1.41982	2.80162	10341.7	1.01866	10009	0.49554	1.03324	2.03882	26289.5	2.58952	12330.7	0.610482	2.13205	4.20701
11878.2	1.17	22743	1.12599	0.52228	1.03058	19097.5	1.88111	17266.7	0.85486	1.10604	2.18246	32211.5	3.17283	25621.3	1.26849	1.25721	2.48077	12170.8	1.19882	10708.5	0.530169	1.13656	2.24269	28656.6	2.82267	16676.1	0.825622	1.71842	3.39083
9045.72	0.891002	20762.8	1.02795	0.435668	0.859673	17671.4	1.74063	14030.8	0.694652	1.25948	2.48524	35946.1	3.54069	26621.8	1.31803	1.35025	2.66435	19641.9	1.93472	11781.4	0.58329	1.66719	3.28975	25332.5	2.49524	22739.2	1.1258	1.11404	2.19826
10912.1	1.07484	18965.1	0.938948	0.57538	1.13536	18482.3	1.82051	13782.5	0.68236	1.341	2.6461	28279.3	2.78551	28132.1	1.3928	1.00523	1.98355	22969.3	2.26248	9984.04	0.494302	2.30061	4.53962	36258.4	3.57145	22183.9	1.09831	1.63445	3.22514
14099.4	1.38879	25951	1.28481	0.54331	1.07207	14960.1	1.47357	16687.8	0.826198	0.896473	1.76895	19172.2	1.88846	17148.3	0.848998	1.11803	2.20612	13552.3	1.3349	12257.6	0.606866	1.10562	2.18163	24247.4	2.38836	17944.5	0.888418	1.35124	2.66631
11456.6	1.12847	24514.5	1.2137	0.467338	0.922164	22670.6	2.23305	15370.8	0.760996	1.47491	2.91034	31140.8	3.06737	18540	0.9179	1.67966	3.31435	12305.9	1.21213	13926.7	0.689501	0.883621	1.74359	16930.7	1.66767	10272.1	0.508562	1.64822	3.25232
11715.6	1.15399	26321.3	1.30315	0.445099	0.878281	19829.7	1.95322	18843.6	0.932933	1.05233	2.07648	27449.8	2.7038	19967.7	0.988584	1.37471	2.71262	7711.47	0.759579	9564.19	0.473516	0.806285	1.59098	25857.9	2.547	13482.5	0.667506	1.91789	3.78443
10611.3	1.04522	20949.3	1.03718	0.506525	0.999489	15901.7	1.56631	17408.9	0.861903	0.913421	1.80239	28939	2.85049	24424.4	1.20923	1.18484	2.33796	20752.4	2.04411	12286	0.608272	1.68911	3.33299	21514.5	2.11918	10821.4	0.535757	1.98815	3.92308
10874.7	1.07116	18811.1	0.931325	0.578099	1.14072	9391.71	0.925082	17175.3	0.850335	0.546815	1.07899	30608	3.01489	18517.8	0.9168	1.6529	3.26155	13994.2	1.37843	12464	0.617084	1.12277	2.21548	21233.8	2.09152	11564.1	0.57253	1.83618	3.6232
11491.4	1.13191	23013.6	1.13939	0.499333	0.985297	13312.5	1.31128	15392.2	0.762058	0.864883	1.70661	34941.6	3.44175	20115.4	0.9959	1.73706	3.42761	14981.8	1.47571	11359.2	0.562384	1.31892	2.60253	23826.2	2.34688	9562.56	0.473435	2.49161	4.91652
10969.8	1.08052	23543.3	1.16561	0.465941	0.919408							41694.7	4.10692	27382.1	1.35567	1.5227	3.00464	19083.8	1.87975	13371.6	0.662017	1.42719	2.81617	22571.9	2.22333	7790.19	0.385687	2.89748	5.71739
11400.9	1.12299	26172.3	1.29577	0.435612	0.859561							28254.9	2.78311	19865.2	0.983513	1.42233	2.80658	12723.7	1.25329	9605.86	0.475579	1.32458	2.6137	22193.2	2.18603	12263.3	0.607148	1.80973	3.571
10207.8	1.00547	22047.6	1.09156	0.462991	0.913586							18102.5	1.7831	17959.9	0.889181	1.00794	1.9889	22862.5	2.25195	12762.4	0.631856	1.79139	3.53483	33705.9	3.32003	10404	0.515093	3.23971	6.39268
												28798	2.8366	19046.5	0.942978	1.51198	2.98349	20111.5	1.98098	13391.2	0.662989	1.50184	2.96348	30139.1	2.96869	12931.9	0.64025	2.33059	4.59879
																		20260.2	1.99562	13498.6	0.668305	1.50091	2.96163	26087	2.56957	13425.8	0.664703	1.94305	3.83408
																		19981	1.96812	12633.8	0.625488	1.58155	3.12076	30557.9	3.00995	14708.7	0.728215	2.07755	4.09947
																		24670.8	2.43008	14202.5	0.703157	1.73707	3.42764

## Sheet: set2 data
Ctl (BP1)						HS						1h						2h						3h
Inner intens/area	Inner Norm Avg	Outer intens/area	Outer Norm Avg	N/C (in/out)	N/C Norm Avg	Inner intens/area	Inner Norm Avg	Outer intens/area	Outer Norm Avg	N/C (in/out)	N/C Norm Avg	Inner intens/area	Inner Norm Avg	Outer intens/area	Outer Norm Avg	N/C (in/out)	N/C Norm Avg	Inner intens/area	Inner Norm Avg	Outer intens/area	Outer Norm Avg	N/C (in/out)	N/C Norm Avg	Inner intens/area	Inner Norm Avg	Outer intens/area	Outer Norm Avg	N/C (in/out)	N/C Norm Avg
23024.4	0.720449	23859.4	0.836817	0.965003	0.842846	27890.2	0.872704	40612.7	1.42441	0.686735	0.599803	32289.2	1.01035	34514.6	1.21053	0.935523	0.817097	22285	0.697314	40585	1.42344	0.549094	0.479585	42571.4	1.33209	36954.9	1.29611	1.15198	1.00616
30209.2	0.945268	29684.8	1.04113	1.01767	0.888842	55524.4	1.7374	43764.6	1.53495	1.26871	1.1081	33080.7	1.03512	35101.4	1.23111	0.942433	0.823133	20326.4	0.636027	24505.2	0.859468	0.829472	0.724471	29028.1	0.908312	31703.8	1.11194	0.915604	0.7997
37618	1.1771	34702	1.2171	1.08403	0.946805	40651.5	1.27202	37823.9	1.32659	1.07476	0.938707	30059	0.940567	28895.2	1.01344	1.04027	0.908588	23767.2	0.743693	25496.2	0.894225	0.932186	0.814183	24475	0.76584	25107.2	0.880582	0.974819	0.851419
38269.1	1.19747	38372.9	1.34585	0.997295	0.871049	38318.3	1.19901	39108.7	1.37165	0.97979	0.855761	23163.2	0.724795	31101.8	1.09083	0.744756	0.650479	19799.9	0.619554	31000.5	1.08728	0.638696	0.557845	21518.3	0.673325	28870.5	1.01257	0.745339	0.650989
31267.5	0.978382	33784.7	1.18493	0.925493	0.808337	46324	1.44951	37357.3	1.31023	1.24003	1.08306	24538	0.767814	28940.2	1.01502	0.847887	0.740555	34115.9	1.06751	14964	0.524832	2.27986	1.99126	26502.2	0.829273	28535.5	1.00082	0.928745	0.811178
33954.5	1.06246	24223.7	0.849596	1.40171	1.22427	41060.9	1.28482	39621.5	1.38964	1.03633	0.905141	26988	0.844474	28137.9	0.986879	0.959131	0.837717	27054.4	0.846553	23358.2	0.819239	1.15824	1.01162	26981.2	0.844261	30605.6	1.07343	0.881576	0.769979
28299.9	0.885526	24702.3	0.866383	1.14564	1.00061	47221.3	1.47759	36619.7	1.28436	1.2895	1.12627	26156.1	0.818445	30410.8	1.06659	0.860095	0.751218	21729.9	0.679945	21438.4	0.751908	1.0136	0.885288	39255.2	1.22832	29809.6	1.04551	1.31686	1.15016
23611.1	0.73881	22474	0.788227	1.0506	0.917606	40413.5	1.26457	37108.8	1.30151	1.08905	0.951193	34032.3	1.0649	30016	1.05275	1.1338	0.990279	15027.4	0.470219	27362	0.959666	0.549207	0.479684	41335.6	1.29342	22176.2	0.777784	1.86396	1.62801
32536.3	1.01809	27766.5	0.973854	1.17178	1.02345	32957.1	1.03125	30397.2	1.06612	1.08421	0.946967	28594.3	0.894737	18722.8	0.656662	1.52725	1.33392	21745.6	0.680437	27310.5	0.957858	0.796237	0.695444	23171.8	0.725062	30017	1.05278	0.771956	0.674235
31228.4	0.97716	30504.3	1.06987	1.02374	0.894145	35332.4	1.10558	31072.1	1.08979	1.13711	0.993166	27416	0.857866	23517.2	0.824815	1.16579	1.01821	20528.9	0.642364	33715.1	1.18249	0.608892	0.531814	26985.1	0.844382	28515.5	1.00012	0.94633	0.826537
25705.2	0.804336	29127.7	1.02159	0.882501	0.770787	37362.9	1.16911	30762.2	1.07892	1.21457	1.06082	28629.9	0.895852	36251.1	1.27143	0.789768	0.689793	29456	0.921699	27249.2	0.95571	1.08098	0.944144	29135.8	0.911682	34028	1.19346	0.856231	0.747843
32481	1.01635	36000.2	1.26263	0.902245	0.788032	43822.2	1.37123	32041.2	1.12378	1.36768	1.19455	71234.2	2.22897	59750.8	2.09563	1.19219	1.04127	25398.6	0.794742	40433.9	1.41813	0.628152	0.548636	32383.8	1.01331	32383.6	1.13579	1.00001	0.873419
33584.9	1.0509	21770	0.763538	1.54271	1.34743	44487.6	1.39205	31948.7	1.12053	1.39247	1.2162	41600.4	1.30171	11365.6	0.398625	3.6602	3.19686	33052.9	1.03425	38098.1	1.33621	0.867575	0.75775	33812.9	1.05803	44824	1.57211	0.754349	0.658858
32524.2	1.01771	31070.5	1.08973	1.04679	0.914276	35687.1	1.11668	28378.6	0.995319	1.25754	1.09835	23684.2	0.741097	20720	0.72671	1.14306	0.998365	34576.4	1.08192	38566.6	1.35264	0.896537	0.783047	46155.4	1.44424	29329.4	1.02867	1.57369	1.37448
29847.9	0.933962	26327.1	0.923368	1.13373	0.990215	33795.1	1.05747	31344.2	1.09933	1.07819	0.941708	27875.1	0.872234	21534.4	0.755272	1.29445	1.13059	40347.1	1.26249	40492	1.42017	0.996422	0.870288	32329.2	1.0116	36994.5	1.2975	0.873891	0.763268
24684	0.77238	22875.3	0.802303	1.07907	0.942471	43469.9	1.36021	39803.2	1.39601	1.09212	0.953873	39779	1.24471	30993.1	1.08702	1.28348	1.12101	20881.5	0.653397	27143.6	0.952007	0.769295	0.671912	19221.1	0.601444	18937.1	0.664181	1.015	0.88651
17905.8	0.560286	14021.4	0.49177	1.27704	1.11538	23709.4	0.741885	25632.5	0.899005	0.924975	0.807884	37321	1.1678	23631.6	0.82883	1.57928	1.37936	26515.9	0.829701	40561.1	1.42259	0.653727	0.570973	26452.5	0.827719	23270.4	0.816161	1.13674	0.992847
20142.5	0.630274	16433.3	0.576363	1.22571	1.07055	36091.7	1.12934	26510.6	0.929804	1.36141	1.18907	42241.8	1.32178	27968	0.98092	1.51036	1.31917	28436.8	0.88981	31407.9	1.10157	0.905405	0.790792	24774.2	0.775202	27691	0.971202	0.894666	0.781413
33397.9	1.04505	26144.4	0.91696	1.27744	1.11573	20497	0.641365	15157.4	0.531614	1.35227	1.18109	35944.4	1.12473	28726.1	1.00751	1.25128	1.09289	20425.3	0.639123	32500.9	1.1399	0.628453	0.548899	35199.6	1.10142	28167.9	0.98793	1.24964	1.09145
29397.6	0.919872	22055.4	0.773547	1.3329	1.16417	39676.8	1.24152	26557.8	0.931459	1.49398	1.30486	47033.1	1.4717	41694.8	1.46236	1.12803	0.985239	30273	0.947263	37596	1.3186	0.805217	0.703286	38048.8	1.19058	33322.4	1.16872	1.14184	0.997296
16299.7	0.51003	13259.6	0.465051	1.22928	1.07367	20742.6	0.64905	26336.6	0.923701	0.787595	0.687895	32890.9	1.02918	41011.3	1.43839	0.801995	0.700472	34450.2	1.07797	22479.8	0.788431	1.5325	1.3385	23590.4	0.738162	18460.8	0.647472	1.27787	1.11611
38074.8	1.19139	33455.1	1.17337	1.13809	0.994018	24409.8	0.7638	20281.2	0.71132	1.20357	1.05121	42332.4	1.32461	42608.7	1.49441	0.993515	0.867748	19694.8	0.616264	29323.3	1.02845	0.671642	0.58662	36459.8	1.14085	34465.1	1.20879	1.05788	0.923962
29544.5	0.924468	36034.7	1.26384	0.819889	0.716101	38983.9	1.21984	36101.2	1.26617	1.07985	0.943155	35488	1.11045	33291.4	1.16763	1.06598	0.931041	34707.1	1.08601	29359.1	1.02971	1.18216	1.03251	24651.2	0.771356	29251.8	1.02595	0.842726	0.736047
35125.4	1.0991	39074.7	1.37046	0.898931	0.785137	42265.2	1.32251	34570.9	1.2125	1.22257	1.06781	43833.3	1.37158	44383.6	1.55666	0.987602	0.862583	38979	1.21968	37895.9	1.32912	1.02858	0.898374	30668.1	0.959628	35109.8	1.2314	0.87349	0.762917
38182.9	1.19477	30736.1	1.078	1.24228	1.08503	27357.2	0.856028	26884.8	0.942929	1.01757	0.888759	46082.3	1.44195	35591.3	1.24829	1.29477	1.13086	25841.7	0.808606	33237.2	1.16573	0.777493	0.679072	23085.9	0.722376	30983.6	1.08669	0.745101	0.650781
40383	1.26362	32282.1	1.13223	1.25094	1.09259	40338.4	1.26222	26908.8	0.943771	1.49908	1.30931	57536.1	1.80035	35903.5	1.25924	1.60252	1.39966	28859.1	0.903021	34642	1.215	0.833065	0.727609	18123.1	0.567085	19297.4	0.676815	0.939148	0.820263
42388.7	1.32637	28612.5	1.00352	1.48147	1.29394	41291.4	1.29204	30825.6	1.08114	1.33952	1.16995	31355.1	0.981125	37042.2	1.29918	0.846469	0.739316	61641.9	1.92882	51526.7	1.80719	1.19631	1.04487	17156	0.536824	17804.5	0.624457	0.963575	0.841598
37404.6	1.17042	32602.4	1.14346	1.14729	1.00206	28976.1	0.906684	25544.7	0.895926	1.13433	0.990739	38164.7	1.1942	40805.8	1.43118	0.935277	0.816882	44069.3	1.37896	44976.3	1.57745	0.979833	0.855798	30414.5	0.951692	35561.7	1.24725	0.85526	0.746995
37153.1	1.16255	31880.7	1.11815	1.16538	1.01786	27872.9	0.872164	30116.3	1.05627	0.925509	0.808351	35011.8	1.09555	36616.3	1.28424	0.95618	0.83514	57077.9	1.78601	62836	2.20384	0.908363	0.793375	25205.3	0.788693	30817.7	1.08087	0.817884	0.71435
35240.2	1.10269	37636.4	1.32002	0.936334	0.817806	38727.2	1.2118	29383.2	1.03055	1.318	1.15116	38715.4	1.21143	33731.4	1.18306	1.14776	1.00246	37844.5	1.18418	50825.5	1.7826	0.744596	0.650339	21573.2	0.675041	30965.1	1.08604	0.696694	0.608501
34180.7	1.06954	33344.1	1.16948	1.02509	0.895326	29134.6	0.911643	23486.1	0.823727	1.2405	1.08347	42058.4	1.31604	35962.2	1.2613	1.16951	1.02147	30898.3	0.966829	47087.9	1.65151	0.656182	0.573118	23535.5	0.736444	25689.2	0.900993	0.916166	0.80019
34421.7	1.07708	24789.5	0.869439	1.38856	1.21279	34346.4	1.07472	32811.1	1.15078	1.04679	0.914281	31844.9	0.99645	28378.4	0.995313	1.12215	0.980101	33934.6	1.06184	49016.2	1.71914	0.692314	0.604675	26251.5	0.82143	25843.8	0.906417	1.01578	0.887193
39820.6	1.24602	31537.8	1.10612	1.26263	1.1028	36778.8	1.15083	37507.4	1.31549	0.980573	0.856444	35242.1	1.10275	35896.7	1.259	0.981765	0.857486	29523.6	0.923814	55800.6	1.95709	0.52909	0.462114	29920.4	0.936233	30185.1	1.05868	0.991232	0.865754
33043.9	1.03397	31929	1.11984	1.03492	0.903908	30917.7	0.967439	28492.1	0.999301	1.08513	0.947769	34641.7	1.08396	36365.3	1.27544	0.952603	0.832015	28416	0.889158	45071.1	1.58078	0.63047	0.55066	17704.2	0.553977	19538.7	0.685278	0.90611	0.791408
27401	0.857397	27129.2	0.951501	1.01002	0.882161	41645.4	1.30312	29511	1.03504	1.41118	1.23254	36752.4	1.15001	33879	1.18823	1.08482	0.947491	33801.8	1.05768	22786.5	0.799189	1.48341	1.29563	15922.7	0.498233	17779.1	0.623565	0.895585	0.782215
30229.5	0.945903	26991	0.946653	1.11998	0.978208	30623.6	0.958236	35487.9	1.24466	0.862931	0.753694	35478.5	1.11015	34802	1.22061	1.01944	0.890392	29844	0.933841	44720.2	1.56847	0.667349	0.582871	17815.4	0.557459	16213.6	0.568657	1.0988	0.959705
34172.9	1.06929	30394.7	1.06603	1.1243	0.981981	35148.7	1.09983	32891.5	1.1536	1.06863	0.933351	31711.5	0.992275	28569.6	1.00202	1.10997	0.969463	43947.9	1.37516	50937.4	1.78652	0.862784	0.753566	30848.6	0.965276	23713.9	0.831715	1.30087	1.13619
36671.9	1.14749	26938.1	0.944799	1.36134	1.18901	31778.3	0.994368	25419.6	0.891539	1.25015	1.0919							29706	0.929524	37014.5	1.29821	0.802552	0.700959	20848.8	0.652375	18295.2	0.641667	1.13958	0.99532
35453.2	1.10936	19344.6	0.678473	1.83271	1.60071	31329.8	0.980334	29508.6	1.03495	1.06172	0.92732							39085.9	1.22303	31341.2	1.09923	1.24711	1.08924	26021.8	0.814242	15870.8	0.556635	1.6396	1.43205
34472	1.07865	31456.3	1.10326	1.09587	0.957146	36057.7	1.12827	29807.3	1.04543	1.20969	1.05656							33699.7	1.05449	36833.3	1.29185	0.914924	0.799106	22148.6	0.693046	27821.2	0.97577	0.796105	0.695328
28198.3	0.882345	24329.6	0.853311	1.15901	1.01229	34801	1.08895	29482.1	1.03402	1.18041	1.03099							31657	0.99057	36260.9	1.27178	0.873032	0.762517	33220.7	1.0395	32292.3	1.13259	1.02875	0.898522
35041.2	1.09646	30972.3	1.08629	1.13137	0.988152													37402.6	1.17035	47144.6	1.6535	0.793359	0.692929	20762.8	0.649685	21460.9	0.752697	0.967473	0.845002
31615	0.989257	35387	1.24113	0.893407	0.780312													447.648	0.0140073	459.95	0.0161318	0.973254	0.850052	34654.5	1.08437	29390.3	1.0308	1.17912	1.02985
																		26265.2	0.821857	26132.1	0.91653	1.00509	0.877859	19864.9	0.621589	20148.8	0.706678	0.985911	0.861106
																		27407.5	0.857601	40656.2	1.42593	0.674129	0.588793	27725.6	0.867556	22592.6	0.792389	1.2272	1.07185
																		33653.5	1.05304	27980.2	0.981346	1.20276	1.05051	19232.8	0.601809	24455	0.857708	0.786457	0.686901
																		26852.9	0.840249	38872.4	1.36337	0.690797	0.60335	50409	1.57734	39221.3	1.37561	1.28524	1.12255
																								33847.3	1.05911	31236.7	1.09556	1.08357	0.946407
																								32554.7	1.01866	34573	1.21258	0.941623	0.822425
																								44179.3	1.3824	34327.6	1.20397	1.28699	1.12407
																								39464.5	1.23487	34314.1	1.2035	1.15009	1.00451
																								41517.3	1.29911	40950.9	1.43627	1.01383	0.885494
Ctl (Hsc70)						HS						1h						2h						3h
Inner intens/area	Inner Norm Avg	Outer intens/area	Outer Norm Avg	N/C (in/out)	N/C Norm Avg	Inner intens/area	Inner Norm Avg	Outer intens/area	Outer Norm Avg	N/C (in/out)	N/C Norm Avg	Inner intens/area	Inner Norm Avg	Outer intens/area	Outer Norm Avg	N/C (in/out)	N/C Norm Avg	Inner intens/area	Inner Norm Avg	Outer intens/area	Outer Norm Avg	N/C (in/out)	N/C Norm Avg	Inner intens/area	Inner Norm Avg	Outer intens/area	Outer Norm Avg	N/C (in/out)	N/C Norm Avg
9411.29	0.958684	17321	0.880283	0.543346	1.06553	12347.6	1.2578	20018.9	1.0174	0.616798	1.20957	30947.3	3.15245	12119.9	0.615953	2.55343	5.0074	23925.4	2.43718	16773.2	0.852446	1.42641	2.79725	24452.9	2.4909	10213.6	0.519073	2.39415	4.69504
10553.3	1.07502	21704.2	1.10305	0.486233	0.953526	24351.3	2.48056	19829.9	1.00779	1.22801	2.40818	27693.5	2.82101	14957	0.760142	1.85154	3.63095	25505.5	2.59812	13398.8	0.68095	1.90357	3.73298	26718.8	2.72173	11028.5	0.560487	2.42271	4.75105
8049.61	0.819977	18733.8	0.952082	0.429685	0.842632	22283.4	2.26991	19783.1	1.00541	1.12639	2.2089	20312.3	2.06912	8561.17	0.435094	2.37261	4.65279	25640.1	2.61184	6752.21	0.343159	3.79729	7.44666	28118.8	2.86433	10734.5	0.545546	2.61948	5.13692
9162.35	0.933327	22491.9	1.14308	0.407363	0.798857	21195.1	2.15905	17953.8	0.912445	1.18053	2.31508	14736.1	1.5011	8182.42	0.415845	1.80095	3.53174	20135.4	2.0511	8427.67	0.428309	2.3892	4.68534	27770.9	2.82889	9444.65	0.479994	2.94038	5.76622
9526.7	0.970441	24493.4	1.2448	0.38895	0.762748	26966.7	2.74698	17216.8	0.874988	1.5663	3.07159	16524.9	1.68332	9769.6	0.496508	1.69146	3.31704	25237.7	2.57084	5406.69	0.274777	4.66786	9.15389	25090.4	2.55585	8611.39	0.437646	2.91363	5.71377
10114.7	1.03034	15298.2	0.777482	0.66117	1.29659	23698.6	2.41407	18198	0.924854	1.30227	2.5538	30486.5	3.10552	9451.22	0.480328	3.22567	6.32568	20110	2.04851	8408.16	0.427317	2.39173	4.69028	20469	2.08508	7492.35	0.380774	2.73199	5.35755
11030.2	1.12359	19496	0.990821	0.565766	1.10949	24105.5	2.45551	14486.8	0.736245	1.66396	3.2631	20661.6	2.1047	13949	0.708912	1.48122	2.90475	14672.3	1.49459	9960.16	0.506193	1.47309	2.8888	21730.5	2.21359	10479.2	0.532574	2.07367	4.06657
8778.44	0.894219	16298.4	0.828316	0.538606	1.05623	23622.7	2.40634	19426.7	0.9873	1.21599	2.38461	25272.6	2.5744	13356.3	0.678789	1.89219	3.71066	15454.1	1.57424	9082.86	0.461607	1.70146	3.33664	24807.3	2.52701	5007.52	0.254491	4.95402	9.71506
11083.2	1.12899	18964.4	0.963806	0.58442	1.14607	11551.7	1.17672	13130.1	0.667293	0.87979	1.72531	23995.9	2.44435	7133.9	0.362557	3.36365	6.59627	24202.5	2.46539	7231.37	0.367511	3.34687	6.56337	21119	2.1513	7499.62	0.381144	2.81601	5.52234
10556.1	1.0753	20766.2	1.05537	0.50833	0.996859	14012.3	1.42737	10791	0.548416	1.29852	2.54646	20881.4	2.1271	10768.7	0.547285	1.93908	3.80263	17324.5	1.76477	10084.5	0.512511	1.71794	3.36897	23585.9	2.40259	5145.76	0.261517	4.58357	8.98859
7406.1	0.754426	18742	0.952504	0.39516	0.774927	16271.8	1.65753	12866.3	0.653885	1.26469	2.48011	25288.1	2.57599	12109.7	0.615438	2.08825	4.09515	19897.6	2.02687	6667.51	0.338855	2.98426	5.85227	19725.8	2.00937	6691.46	0.340072	2.9479	5.78097
8537.94	0.86972	20264.3	1.02987	0.421328	0.826244	21105.5	2.14992	10496.1	0.533429	2.0108	3.94326	23105.6	2.35366	25863.4	1.31442	0.893371	1.75194	28666.6	2.92014	16682.9	0.847854	1.71832	3.36971	24228.3	2.46803	6872.25	0.34926	3.52553	6.91372
8136.38	0.828816	13887.4	0.70578	0.585884	1.14895	19227.3	1.95859	12920.7	0.656653	1.4881	2.91823	14604.8	1.48772	4318.1	0.219454	3.38223	6.6327	22121.1	2.25337	12084.7	0.614164	1.83051	3.58971	12946	1.31874	12133	0.616618	1.06701	2.09245
11260.2	1.14702	22084.9	1.12239	0.509861	0.99986	17679	1.80088	11057.6	0.561968	1.59881	3.13534	27154.5	2.76611	10888.2	0.553358	2.49394	4.89073	22144.5	2.25576	12574.6	0.639064	1.76105	3.45349	25612.4	2.60901	6175.11	0.31383	4.14768	8.13379
8726.43	0.888921	15533.2	0.789425	0.561792	1.1017	12311.9	1.25416	13799.6	0.701322	0.892189	1.74962	10433.9	1.06285	6588.25	0.334826	1.58371	3.10573	19637.4	2.00038	11588.3	0.58894	1.69458	3.32316	20048.9	2.04229	8176.21	0.415529	2.45211	4.80869
7874.19	0.802108	16572.8	0.842257	0.475129	0.931749	19374.7	1.97361	22482.8	1.14262	0.861755	1.68994	29829.3	3.03857	10483.5	0.532788	2.84537	5.5799	23609.3	2.40497	16469.5	0.837007	1.43352	2.8112	28402.8	2.89326	5096.17	0.258996	5.57336	10.9296
7426.86	0.75654	13248.4	0.673307	0.560586	1.09933	17268.2	1.75903	14031.3	0.713093	1.23069	2.41345	28707.4	2.92429	7337.59	0.372909	3.91238	7.67235	20592.5	2.09767	16872.2	0.857474	1.2205	2.39346	25755.5	2.62359	6862.32	0.348755	3.75317	7.36014
8908.37	0.907454	18857.1	0.958351	0.472414	0.926426	19510	1.9874	12263.2	0.623238	1.59094	3.11991	29843.4	3.04001	8789.2	0.446683	3.39546	6.65865	29147	2.96907	11533.2	0.586138	2.52722	4.956	27509.7	2.80228	6353.06	0.322874	4.33014	8.49161
10166.2	1.03559	16245	0.825599	0.625806	1.22723	14396	1.46645	7013.68	0.356448	2.05256	4.02516	26045.1	2.65309	11361.7	0.577424	2.29235	4.4954	29312.5	2.98593	11535.8	0.586268	2.54101	4.98304	20020.2	2.03936	6987.96	0.355141	2.86495	5.6183
8952.08	0.911907	14632.2	0.743634	0.611807	1.19978	19974.7	2.03473	10920.5	0.555001	1.8291	3.58694	28657.4	2.9192	14855	0.754958	1.92914	3.78313	29950.8	3.05095	10879.3	0.552905	2.75301	5.39878	18996.6	1.93509	5707.31	0.290055	3.32847	6.52728
5428.65	0.552991	8429.31	0.428393	0.64402	1.26295	13864.7	1.41233	13397.8	0.680898	1.03485	2.02939	27047.6	2.75521	16780.3	0.852802	1.61187	3.16095	23702.4	2.41445	12308.4	0.625532	1.92572	3.77642	11962.2	1.21854	6388.21	0.32466	1.87255	3.67215
10621.3	1.08194	24046.5	1.22209	0.441698	0.866191	18365.5	1.87081	9304.38	0.472865	1.97386	3.87082	27434.5	2.79463	16130.7	0.81979	1.70077	3.33528	34471	3.5114	11093.7	0.5638	3.10726	6.09348	19354	1.9715	8484.77	0.431211	2.28103	4.4732
8648.68	0.881001	23927.5	1.21604	0.361453	0.708827	15926.3	1.62234	18739.6	0.952378	0.849875	1.66664	20714.2	2.11006	10372	0.527121	1.99714	3.91648	20901.3	2.12912	15620.5	0.793862	1.33807	2.62401	14269.8	1.4536	9286.55	0.471959	1.53661	3.01336
9370.36	0.954516	26246.3	1.33389	0.357016	0.700125	21459.4	2.18597	18113.9	0.92058	1.18469	2.32324	26800.3	2.73003	17770.4	0.903125	1.50814	2.95754	33495.4	3.41202	14164.3	0.719853	2.36478	4.63745	14351.9	1.46196	4149.58	0.210889	3.45863	6.78254
10988	1.11929	23878.2	1.21353	0.460166	0.902408	15234.9	1.55191	13948.4	0.708883	1.09223	2.14192	25843.2	2.63253	12659.9	0.643401	2.04134	4.00316	31032.4	3.16113	8934.89	0.454087	3.47318	6.81106	11425.1	1.16382	4883.77	0.248202	2.3394	4.58767
10189.2	1.03793	20381.1	1.0358	0.499936	0.980397	19366.7	1.9728	13188.8	0.670276	1.46843	2.87965	22500.8	2.29206	15819.6	0.803982	1.42234	2.78927	34662.1	3.53086	10407.1	0.528908	3.33061	6.53149	14710.5	1.49849	3569.13	0.181389	4.12159	8.08263
10118.3	1.0307	18930.9	0.962101	0.534486	1.04815	19613.3	1.99792	13703.5	0.696436	1.43126	2.80677	26424.4	2.69173	13782.6	0.700456	1.91723	3.75978	19865.5	2.02361	25102	1.27573	0.791391	1.55196	23567.3	2.40069	2858.14	0.145256	8.24567	16.1701
11829.9	1.20506	24241	1.23197	0.488013	0.957016	16041.4	1.63406	11297.7	0.574171	1.41987	2.78444	22709.9	2.31335	16148	0.820668	1.40636	2.75794	52161.6	5.31346	14024.2	0.712736	3.71939	7.2939	12434.9	1.26668	3397.59	0.172671	3.65991	7.17725
11885.3	1.2107	23250	1.18161	0.511195	1.00248	15552.8	1.5843	16021.3	0.814228	0.970763	1.90371	29395.2	2.99436	10950.9	0.556546	2.68426	5.26396	15435.4	1.57233	29894.5	1.51929	0.51633	1.01255	15600	1.5891	4786.92	0.24328	3.25888	6.39081
12640.7	1.28765	25376.1	1.28966	0.498134	0.976864	18606.4	1.89535	10329.1	0.524945	1.80135	3.53253	25215.9	2.56863	13144.8	0.668044	1.91831	3.7619	34556.3	3.52009	10692.5	0.54341	3.23183	6.33777	11343.2	1.15548	4174.46	0.212154	2.71729	5.32874
12971.3	1.32133	26676.8	1.35576	0.486239	0.953537	17387.9	1.77122	12084.6	0.614162	1.43884	2.82163	24549.5	2.50075	9777.56	0.496913	2.5108	4.9238	45127.2	4.5969	15339	0.779556	2.94199	5.76937	19452	1.98149	5831.52	0.296368	3.33567	6.5414
12920.7	1.31618	20622.6	1.04807	0.626534	1.22866	17771	1.81025	10794.3	0.548586	1.64633	3.22853	27161.9	2.76686	14280.2	0.725743	1.90207	3.73006	36613.9	3.72969	16732.9	0.850394	2.18814	4.29105	13195.2	1.34413	4727.69	0.240269	2.79105	5.47338
10974.9	1.11796	20378.3	1.03566	0.53856	1.05614	15625.9	1.59173	16559.1	0.841564	0.943641	1.85052	31445.3	3.20318	13949.8	0.708954	2.25417	4.42053	35339.6	3.59989	19442.2	0.988086	1.81768	3.56455	15918.1	1.6215	6596.59	0.33525	2.41308	4.73216
8634.91	0.879599	19831.9	1.00789	0.435404	0.853848	11670	1.18877	11095.2	0.563878	1.0518	2.06263	25597.8	2.60753	12301.2	0.625167	2.08093	4.08079	39522.5	4.02597	11650.5	0.592098	3.39234	6.65254	18453.2	1.87975	5481.12	0.27856	3.36669	6.60224
8764.67	0.892817	22918.8	1.16477	0.382423	0.749948	19267.6	1.9627	12771.2	0.649056	1.50867	2.95857	35347.7	3.60071	13773	0.69997	2.56644	5.03291	32057.2	3.26551	9488.65	0.48223	3.37847	6.62534	14470.9	1.47408	4115.61	0.209162	3.51609	6.89521
11525.6	1.17406	18038.2	0.916732	0.638956	1.25302	12719.5	1.29567	14552.2	0.739567	0.87406	1.71407	27089	2.75943	11736.2	0.596456	2.30815	4.5264	29292.8	2.98393	15625.1	0.794095	1.87473	3.67643	19422	1.97843	5320.04	0.270374	3.65073	7.15925
10271.9	1.04635	22303.7	1.13351	0.460548	0.903156	20949.7	2.13405	13285	0.675165	1.57695	3.09247	30367	3.09334	13226.9	0.672212	2.29586	4.50229	27684.5	2.82009	14352.3	0.729411	1.92892	3.7827	16687.7	1.6999	4190.79	0.212983	3.98199	7.80888
13367.9	1.36173	21784.8	1.10714	0.613634	1.20337	19854.1	2.02245	10672.4	0.54239	1.86032	3.64818							29254	2.97997	10799.5	0.548847	2.70884	5.31216	14768.8	1.50443	4947.76	0.251454	2.98495	5.85363
10700.8	1.09004	13671.4	0.694804	0.782717	1.53494	15515.5	1.58049	12636.9	0.64223	1.22779	2.40775							36476.8	3.71572	12254.8	0.622812	2.97653	5.8371	24698.9	2.51597	2971.65	0.151024	8.31154	16.2993
9731.45	0.991298	20952.9	1.06486	0.464444	0.910796	21470.7	2.18712	11422.1	0.580491	1.87975	3.68628							27390.3	2.79012	10505.8	0.533923	2.60716	5.11276	27543.4	2.80572	6022.11	0.306054	4.57371	8.96926
7921.48	0.806924	17476.2	0.888171	0.453272	0.888888	24563.3	2.50215	12800.1	0.650524	1.91899	3.76324							32020.8	3.26181	13601.3	0.691243	2.35424	4.61678	21978.3	2.23883	4397.2	0.223473	4.99826	9.80182
8281.39	0.843587	18722.9	0.951529	0.442315	0.867399													29047.4	2.95892	15799.3	0.802948	1.83853	3.60543	21667.3	2.20715	5681.12	0.288725	3.81391	7.47925
8677.54	0.883941	18374.1	0.933804	0.47227	0.926144													24023.7	2.44719	21420.1	1.08861	1.12155	2.19941	17402.5	1.77272	6140.94	0.312093	2.83386	5.55733
																		19796	2.01653	12114.6	0.615684	1.63407	3.20448	20052.8	2.04269	4335.54	0.22034	4.62522	9.07027
																		26380.8	2.68729	14579.7	0.740968	1.80942	3.54835	18082.1	1.84194	4110.27	0.208891	4.39924	8.62711
																		17792.4	1.81243	10521.5	0.534723	1.69105	3.31622	19632.2	1.99984	7260.83	0.369008	2.70384	5.30236
																		29431.5	2.99805	15087.5	0.766774	1.95072	3.82544	24525.3	2.49828	6911.8	0.35127	3.54833	6.95843
																								28724.9	2.92607	6808.25	0.346007	4.21913	8.27391
																								23279.7	2.3714	12122.9	0.616108	1.92031	3.76581
																								28860.4	2.93987	9007.17	0.45776	3.20416	6.2835
																								28851.5	2.93897	7075.59	0.359594	4.07761	7.99639
																								23696.1	2.41381	5835.92	0.296592	4.06038	7.9626

## Sheet: set3 data
Ctl (BP1)						HS						1h						2h						3h
Inner intens/area	Inner Norm Avg	Outer intens/area	Outer Norm Avg	N/C (in/out)	N/C Norm Avg	Inner intens/area	Inner Norm Avg	Outer intens/area	Outer Norm Avg	N/C (in/out)	N/C Norm Avg	Inner intens/area	Inner Norm Avg	Outer intens/area	Outer Norm Avg	N/C (in/out)	N/C Norm Avg	Inner intens/area	Inner Norm Avg	Outer intens/area	Outer Norm Avg	N/C (in/out)	N/C Norm Avg	Inner intens/area	Inner Norm Avg	Outer intens/area	Outer Norm Avg	N/C (in/out)	N/C Norm Avg
22354.9	1.21093	17904	1.10445	1.2486	1.08251	37868.6	2.05129	28125.3	1.73498	1.34643	1.16732	19888.1	1.07731	16238.5	1.00171	1.22475	1.06183	24671.8	1.33644	22732.9	1.40234	1.08529	0.940925	33819.1	1.83193	26373.1	1.62689	1.28233	1.11175
21355	1.15677	15700.7	0.968537	1.36013	1.1792	36939	2.00093	28870	1.78092	1.27949	1.10929	21539.7	1.16677	19543.6	1.2056	1.10214	0.955528	20307.2	1.10001	22126.1	1.36491	0.917795	0.795709	41812.6	2.26492	27940.7	1.72359	1.49648	1.29741
13839.1	0.749645	12784.6	0.78865	1.08249	0.938493	34116.2	1.84802	23995	1.48019	1.42181	1.23268	27550.1	1.49235	18404.2	1.13531	1.49695	1.29782	19332.7	1.04722	16753.5	1.03348	1.15395	1.00045	31836.2	1.72452	25839.1	1.59395	1.23209	1.0682
15164.5	0.82144	13141.5	0.810666	1.15394	1.00044	36168.8	1.95921	32854.4	2.02671	1.10088	0.954442	22235.9	1.20449	19674.8	1.21369	1.13017	0.979836	27096.1	1.46775	20242.9	1.24874	1.33855	1.16049	21473.9	1.16321	23900.9	1.47439	0.898454	0.778941
18914.7	1.02458	14541.5	0.89703	1.30074	1.12771	32369.1	1.75339	23643.6	1.45851	1.36905	1.18693	20949.2	1.13479	14133	0.871828	1.48229	1.28512	22375.8	1.21206	20257.5	1.24964	1.10457	0.957638	32966.6	1.78575	25413.3	1.56769	1.29721	1.12466
15485	0.838797	9456.48	0.583347	1.6375	1.41968	33644.3	1.82246	25684.6	1.58442	1.3099	1.13566	24858.5	1.34655	19005.2	1.17238	1.30798	1.13399	22855.7	1.23806	18399.4	1.13501	1.2422	1.07696	50915.9	2.75804	32751.1	2.02034	1.55463	1.34783
13345.5	0.722903	12181.9	0.751472	1.09551	0.949788	33524	1.81594	25016.7	1.54322	1.34006	1.16181	22996.3	1.24567	20816.4	1.28411	1.10472	0.957771	23317.9	1.2631	23283.8	1.43632	1.00147	0.868251	38133.3	2.06562	28550.1	1.76118	1.33566	1.15799
15722.5	0.851661	16383.7	1.01067	0.959639	0.831986	35250.9	1.90949	24036.6	1.48276	1.46655	1.27147	17627.2	0.954836	15271.6	0.942069	1.15424	1.0007	20781.8	1.12572	23258.3	1.43475	0.893521	0.774664	48773.8	2.642	31945.9	1.97067	1.52676	1.32367
21241.5	1.15062	17971.2	1.1086	1.18197	1.02475	41137.4	2.22835	40579.7	2.50326	1.01375	0.878896	23142.5	1.25359	19707.9	1.21573	1.17427	1.01807	18779.7	1.01727	23478.7	1.44835	0.79986	0.693462	44889.4	2.43159	27154	1.67506	1.65314	1.43324
24472.9	1.32566	24418.1	1.50629	1.00225	0.868925	35478.9	1.92183	22991.4	1.41828	1.54313	1.33787	18610.7	1.00811	14392.9	0.887861	1.29305	1.12105	22391.4	1.21291	24281.7	1.49788	0.92215	0.799485	26721.7	1.44747	22596.9	1.39395	1.18254	1.02523
15987.8	0.866037	16695.4	1.0299	0.957619	0.830235	30551	1.6549	19144	1.18095	1.59585	1.38357	22045.6	1.19417	12357.2	0.762284	1.78403	1.54671	20430.3	1.10668	18366.8	1.133	1.11235	0.964383	32575.7	1.76458	30122.9	1.85821	1.08143	0.937573
18983.7	1.02832	18159.7	1.12023	1.04538	0.90632	34726.3	1.88107	21503.1	1.32647	1.61495	1.40012	17410.5	0.943098	15467.7	0.954162	1.1256	0.975875	20006.3	1.08371	19680.6	1.21405	1.01655	0.881328	27107.6	1.46838	21543.9	1.32899	1.25825	1.09088
14437.4	0.782054	14805.1	0.913293	0.975164	0.845446	30938.3	1.67588	21169.6	1.3059	1.46145	1.26705	21644.6	1.17245	17778.9	1.09674	1.21743	1.05549	20318.6	1.10063	17572	1.08398	1.1563	1.00249	35769.9	1.9376	26557.4	1.63826	1.34689	1.16773
21355.4	1.15679	23397.8	1.44335	0.912712	0.791302	39400.1	2.13424	28062.8	1.73113	1.404	1.21724	20882.5	1.13118	17322.3	1.06857	1.20553	1.04517	19027.6	1.03069	23487.1	1.44886	0.810129	0.702365	44293.1	2.39929	30784.3	1.89901	1.43882	1.24743
16513.1	0.894488	14529.7	0.896299	1.13651	0.985328	35926.9	1.94611	23248.5	1.43414	1.54535	1.33978	24626.7	1.33399	22226	1.37107	1.10801	0.960623	20789.4	1.12613	27722.7	1.71014	0.749906	0.650153	48859.4	2.64664	37197.2	2.29461	1.31352	1.1388
19069.6	1.03297	18738.7	1.15595	1.01766	0.882289	39269.5	2.12717	30888.5	1.90544	1.27133	1.10222	19215.2	1.04086	16490	1.01723	1.16526	1.01026	21003.2	1.13771	23822.3	1.46954	0.881662	0.764382	31193.5	1.68971	26968.4	1.66362	1.15667	1.00281
18333.5	0.9931	15001.9	0.925428	1.22208	1.05952	29010.8	1.57147	21959.9	1.35465	1.32108	1.14535	17085.3	0.925486	16428.6	1.01344	1.03997	0.901636	22771.6	1.2335	24376.9	1.50375	0.934148	0.809887	23686.1	1.28304	21970.3	1.35529	1.0781	0.93469
19659.9	1.06495	18140.1	1.11902	1.08378	0.939617	34680.7	1.8786	24731.5	1.52562	1.40229	1.21576	21658.7	1.17322	18825.9	1.16133	1.15047	0.997435	21314.4	1.15457	20248.8	1.2491	1.05263	0.912606	40079.3	2.17104	23916.7	1.47536	1.67579	1.45287
31673	1.71568	21184.3	1.30681	1.49511	1.29623	34612	1.87488	29688.8	1.83143	1.16583	1.01075	16324.7	0.884286	13378.8	0.825304	1.2202	1.05788	32611.5	1.76652	25323	1.56212	1.28782	1.11651	33421.3	1.81038	32924.6	2.03104	1.01509	0.880058
20129.9	1.09041	18009	1.11093	1.11777	0.96908	32410.6	1.75563	24829.9	1.53169	1.30531	1.13167	18485.4	1.00133	14446.9	0.891192	1.27955	1.10934	29049.4	1.57356	20284.4	1.25129	1.43211	1.24161	37099.2	2.00961	22999.6	1.41879	1.61304	1.39847
17466.5	0.946133	14740.5	0.909308	1.18493	1.02731	32193.2	1.74386	23006.8	1.41923	1.39929	1.21316	16687.3	0.903924	15877.7	0.979459	1.05098	0.911182	25149.7	1.36232	9727.83	0.600086	2.58534	2.24143	32794.3	1.77642	31174	1.92305	1.05198	0.912042
18582.2	1.00657	14907.4	0.919599	1.24651	1.0807	36061.8	1.95341	23513.9	1.45051	1.53364	1.32963	17908.1	0.970052	13254.9	0.817662	1.35105	1.17133	27730.4	1.50211	15280.4	0.942611	1.81477	1.57336	38081.3	2.06281	27464.3	1.6942	1.38658	1.20213
18868.6	1.02209	18341.8	1.13146	1.02873	0.891884	29286.5	1.5864	19134.6	1.18037	1.53055	1.32695	16408	0.888798	18191	1.12216	0.901989	0.782005	32034.1	1.73524	17554.1	1.08287	1.82487	1.58213	36741.8	1.99025	23974.1	1.4789	1.53257	1.3287
21954	1.18921	17639.3	1.08813	1.24461	1.07905	33341.9	1.80608	17239	1.06343	1.93409	1.67682	29257	1.58481	24597.6	1.51736	1.18943	1.03121	30344	1.64369	21586.5	1.33162	1.40569	1.21871	23596.3	1.27817	22549.1	1.391	1.04644	0.907239
18097	0.980289	17701.7	1.09197	1.02233	0.886342	30292.2	1.64088	23211.4	1.43185	1.30506	1.13146	18735.1	1.01485	17439.3	1.07579	1.0743	0.931397	22363.3	1.21139	15571.8	0.960585	1.43614	1.24511	44914.2	2.43293	29999.3	1.85058	1.49718	1.29802
16563.5	0.897221	14198.6	0.875876	1.16656	1.01138	34527.6	1.87031	22416	1.38279	1.54031	1.33542	18398.1	0.996595	18014.8	1.11129	1.02128	0.885426	25281.5	1.36946	16906.2	1.0429	1.49539	1.29647	37551.5	2.03411	27447.6	1.69318	1.36812	1.18613
16277.8	0.881746	15665.5	0.966367	1.03909	0.900867	31378.2	1.69971	23135	1.42714	1.35631	1.17589	22474.1	1.21739	22200.3	1.36948	1.01234	0.877674	28812	1.5607	22628.2	1.39588	1.27328	1.1039	33168.9	1.79671	23009.2	1.41938	1.44155	1.24979
15702.2	0.850566	14178.7	0.874647	1.10745	0.96014	25728.4	1.39367	27046.6	1.66844	0.95126	0.824722	18069.5	0.978795	18132.1	1.11852	0.996547	0.863985	19905.6	1.07826	16471.3	1.01607	1.20851	1.04775	38469.5	2.08383	28348.6	1.74876	1.35701	1.1765
16791.6	0.909576	12642.9	0.779908	1.32815	1.15148	31111.9	1.68528	25626.1	1.58081	1.21407	1.05257	15157	0.821031	17110.7	1.05552	0.885822	0.767989	31723.2	1.7184	22275.1	1.37409	1.42416	1.23472	43559.7	2.35956	27105.7	1.67209	1.60703	1.39326
16685	0.903799	17927	1.10587	0.930717	0.806912	27573.6	1.49362	19061.8	1.17587	1.44654	1.25412	17182.4	0.930745	15795.9	0.974408	1.08778	0.943082	18335.4	0.993201	18868.5	1.16395	0.971744	0.842482	20593.2	1.1155	24635.8	1.51972	0.835908	0.724715
15845.6	0.858332	12800.7	0.789641	1.23787	1.07321	34994.3	1.89559	23105.9	1.42535	1.51452	1.31305	18902.2	1.0239	16075.9	0.991681	1.17581	1.01941	30978.4	1.67805	25604.4	1.57947	1.20989	1.04895	36086.3	1.95474	26554	1.63805	1.35898	1.1782
17907	0.969993	13872.9	0.855783	1.29079	1.11909	26821	1.45285	21720.2	1.33986	1.23484	1.07058	19544.6	1.0587	18218.5	1.12385	1.07279	0.930086	24858.8	1.34656	31681.8	1.95437	0.784639	0.680266	58975.7	3.19462	24124	1.48815	2.44469	2.11949
22128.7	1.19868	13800.8	0.851337	1.60344	1.39014	32366.6	1.75325	19276.2	1.1891	1.6791	1.45574	21330	1.15542	13470.9	0.830984	1.58342	1.37279	18848.5	1.02099	19252.4	1.18764	0.979019	0.848789	47974.4	2.5987	29792.8	1.83784	1.61027	1.39607
20672.3	1.11979	18949.3	1.16894	1.09093	0.945811	45595.5	2.46984	29270.3	1.80561	1.55774	1.35053	18240.2	0.988043	19027.6	1.17377	0.958616	0.8311	18783.7	1.01749	22411.8	1.38253	0.83812	0.726632	42031.9	2.27681	22738.4	1.40267	1.8485	1.60261
16604.3	0.89943	13806.3	0.851679	1.20266	1.04268	26956.3	1.46018	17433.2	1.07541	1.54627	1.34058	21776.6	1.1796	17751.1	1.09502	1.22677	1.06359	22976.4	1.2446	23725.1	1.46355	0.968442	0.839618	48340.9	2.61855	28923.1	1.78419	1.67136	1.44903
16873.3	0.913999	17173.5	1.05939	0.982518	0.851822	35255.3	1.90972	23960.7	1.47807	1.47138	1.27566	19667	1.06533	14247.2	0.878874	1.38041	1.19679							42684.1	2.31213	30537.2	1.88377	1.39777	1.21184
17995.6	0.974794	18304.7	1.12917	0.983112	0.852337	31913.8	1.72872	26935.4	1.66158	1.18483	1.02722	21104.1	1.14318	17934.5	1.10634	1.17673	1.0202							64023.5	3.46805	36237.6	2.23541	1.76677	1.53175
						37287	2.01978	28119.8	1.73464	1.326	1.14962													28577.3	1.54799	27630.6	1.70446	1.03426	0.896684
						30356.8	1.64438	26687.2	1.64627	1.1375	0.986192													33535	1.81654	31135	1.92064	1.07708	0.933809
						26695.4	1.44605	20395.2	1.25813	1.30891	1.13479													32320.3	1.75074	28286.8	1.74494	1.14259	0.990604
						28922.6	1.56669	20971	1.29365	1.37917	1.19571													50779	2.75062	34710.6	2.14121	1.46293	1.26833
						32037.9	1.73545	25428.1	1.56859	1.25994	1.09235
						27818.3	1.50688	21456	1.32357	1.29653	1.12406
Ctl (Hsc70)						HS						1h						2h						3h
Inner intens/area	Inner Norm Avg	Outer intens/area	Outer Norm Avg	N/C (in/out)	N/C Norm Avg	Inner intens/area	Inner Norm Avg	Outer intens/area	Outer Norm Avg	N/C (in/out)	N/C Norm Avg	Inner intens/area	Inner Norm Avg	Outer intens/area	Outer Norm Avg	N/C (in/out)	N/C Norm Avg	Inner intens/area	Inner Norm Avg	Outer intens/area	Outer Norm Avg	N/C (in/out)	N/C Norm Avg	Inner intens/area	Inner Norm Avg	Outer intens/area	Outer Norm Avg	N/C (in/out)	N/C Norm Avg
7050.24	2.04711	9580.79	1.14842	0.735872	1.75621	12287.1	3.5677	7195.48	0.862498	1.70762	4.07534	7316.77	2.1245	6185.5	0.741435	1.18289	2.82305	18415.8	5.34722	9280.32	1.1124	1.98439	4.73588	26543	7.70706	7380.2	0.88464	3.59652	8.58335
6281.04	1.82377	9481.26	1.13649	0.662469	1.58103	12248.4	3.55645	7777.99	0.932323	1.57475	3.75825	10145.3	2.9458	4362.2	0.522883	2.32573	5.55052	9972.97	2.89576	10794.8	1.29394	0.923868	2.20487	35568.5	10.3277	8518.99	1.02114	4.1752	9.96441
2736.14	0.794467	6123.46	0.733999	0.446828	1.06639	14804.5	4.29865	8010.66	0.960212	1.8481	4.41061	12865.8	3.73572	5636.27	0.675601	2.28268	5.44776	8545.72	2.48134	8718.2	1.04502	0.980216	2.33935	31516	9.15101	7394.68	0.886376	4.26198	10.1715
3347.77	0.972061	7247.74	0.868763	0.461905	1.10237	10117.7	2.93777	7933.8	0.950998	1.27526	3.0435	11908.7	3.45784	5449.7	0.653238	2.18521	5.21516	16216.6	4.70866	7115	0.852852	2.27921	5.43949	27343.9	7.93961	7622.14	0.913641	3.58743	8.56166
3493.03	1.01424	6991.91	0.838097	0.499581	1.19229	12035.5	3.49464	6075.33	0.728229	1.98105	4.72791	7437.08	2.15944	5533.65	0.663301	1.34397	3.20749	8107.95	2.35423	9102.01	1.09103	0.890786	2.12592	21174.7	6.14831	7844.46	0.94029	2.69932	6.44212
3845.84	1.11668	6202.34	0.743455	0.620062	1.47982	11208.2	3.25442	10214.5	1.22438	1.09728	2.61874	14117.9	4.09928	5830.79	0.698917	2.42126	5.77851	7454.44	2.16448	9751.05	1.16883	0.764476	1.82447	15201	4.41377	10731.9	1.2864	1.41643	3.3804
2528.88	0.734288	5736.13	0.687572	0.440868	1.05216	16721.2	4.85519	7931.97	0.950779	2.10808	5.03108	12688.9	3.68436	7255.95	0.869747	1.74876	4.17353	12474.4	3.62208	10424.2	1.24952	1.19667	2.85594	18328.7	5.32193	7323.61	0.877858	2.50268	5.97282
3306.88	0.96019	10945.3	1.31198	0.302128	0.72105	12859.1	3.73378	6280.73	0.75285	2.04739	4.88624	11404.4	3.31139	4360.79	0.522714	2.61521	6.24138	13808.5	4.00944	8875.95	1.06393	1.55572	3.71283	10639	3.08914	8002.78	0.959267	1.32941	3.17272
3475	1.009	7788.82	0.93362	0.446152	1.06477	12178.5	3.53616	13935.7	1.67042	0.873908	2.08564	9866.76	2.86492	7138.48	0.855667	1.38219	3.2987	12037.9	3.49532	8379.19	1.00439	1.43664	3.42863	10931.8	3.17418	8745.99	1.04835	1.24993	2.98303
4325.95	1.25609	11394.5	1.36582	0.379651	0.906064	10065.4	2.9226	6340.82	0.760054	1.5874	3.78843	12210.5	3.54544	4254.83	0.510012	2.86979	6.84895	15311.1	4.44574	8656.35	1.03761	1.76877	4.22129	12089.9	3.51043	3552.19	0.425789	3.4035	8.1227
3492.02	1.01395	11205	1.34311	0.311648	0.743769	8437.04	2.44979	4779.69	0.572925	1.76519	4.21274	10085.1	2.92833	4296.5	0.515007	2.34729	5.60197	12509.4	3.63224	9657.67	1.15763	1.29528	3.09128	10733.3	3.11653	7500.84	0.899101	1.43095	3.41506
3470.63	1.00774	8694.74	1.04221	0.399164	0.952634	11524.9	3.34637	6197.37	0.742859	1.85964	4.43815	12134.3	3.52333	5023.46	0.602146	2.41553	5.76483	11650.1	3.38272	10318.7	1.23687	1.12902	2.69448	7381.39	2.14327	7014.64	0.840821	1.05228	2.51135
4019.73	1.16717	9431.28	1.1305	0.426212	1.01718	13225.5	3.84018	6648.53	0.796938	1.98924	4.74746	11391.7	3.3077	4016.1	0.481397	2.8365	6.76951	10857.2	3.1525	12332.2	1.47822	0.88039	2.10111	25849.2	7.50559	6337.25	0.759625	4.07893	9.73464
4952.19	1.43792	14307.7	1.71502	0.34612	0.826039	10911.1	3.16815	7173.46	0.85986	1.52103	3.63005	11082.8	3.21802	4486.18	0.537743	2.47044	5.89588	15938	4.62777	9901.64	1.18688	1.60963	3.84149	29048.7	8.4346	6405.1	0.767758	4.53524	10.8237
3937.4	1.14327	8373.43	1.0037	0.470226	1.12223	8036.37	2.33345	7518.94	0.901271	1.06882	2.55081	9763.55	2.83495	7357.29	0.881895	1.32706	3.16712	14775.8	4.29032	9390.42	1.1256	1.5735	3.75526	13571.7	3.9407	7030.82	0.842762	1.93032	4.60684
2930.75	0.850974	8886.53	1.0652	0.329796	0.787082	9035.03	2.62342	9488.85	1.1374	0.952174	2.27243	10342.7	3.00313	4922.32	0.590022	2.10119	5.01464	19704.9	5.72152	9547.06	1.14437	2.06397	4.92581	9782.54	2.84047	5909.57	0.708361	1.65537	3.95066
2675.88	0.77697	6948.19	0.832856	0.385119	0.919112	9193.91	2.66955	6313.39	0.756765	1.45626	3.47546	11635.9	3.3786	5288.07	0.633863	2.2004	5.25141	16592.8	4.81789	7872.06	0.943598	2.1078	5.03042	16140.2	4.68648	4448.21	0.533192	3.62847	8.6596
3078.98	0.894015	8683.66	1.04088	0.354572	0.84621	10459.3	3.03698	6139.66	0.735941	1.70357	4.06568	10919.8	3.1707	5321.72	0.637897	2.05194	4.8971	13449.8	3.9053	9810.6	1.17596	1.37095	3.27186	27962.6	8.11926	7254.6	0.869585	3.85447	9.19896
5600.25	1.62609	9424.76	1.12972	0.594205	1.41811	8534.95	2.47821	7048.02	0.844823	1.21097	2.89007	11164.2	3.24163	5255.81	0.629997	2.12416	5.06944	27243.5	7.91045	8371.41	1.00345	3.25435	7.76673	20425.5	5.93077	7558.44	0.906005	2.70235	6.44934
3306.76	0.960153	10025.4	1.20171	0.329839	0.787184	9267.41	2.69089	5879.25	0.704726	1.57629	3.76193	10772.3	3.12786	4698.66	0.563213	2.29264	5.47154	21935	6.36908	8567.74	1.02699	2.56019	6.11007	16997.4	4.93539	4354.75	0.52199	3.90319	9.31524
2980.16	0.865321	8526.26	1.02202	0.349527	0.834169	11131.5	3.23216	7546.19	0.904538	1.47512	3.52047	9541.87	2.77059	5922.41	0.7099	1.61115	3.84511	16634.9	4.83012	7364.88	0.882804	2.25867	5.39048	16329.1	4.74132	7396	0.886535	2.20782	5.26912
3427.4	0.995183	10007.8	1.1996	0.342473	0.817336	8656.8	2.5136	6032.09	0.723047	1.43512	3.42502	5428.34	1.57618	5272.73	0.632025	1.02951	2.457	23014.5	6.6825	6456.14	0.773876	3.56474	8.5075	18988.7	5.51357	7920.54	0.949409	2.3974	5.72155
2807.95	0.81532	8769.96	1.05123	0.320179	0.764128	10360.5	3.00828	7010.27	0.840299	1.4779	3.52711	13328.9	3.87021	6332.95	0.75911	2.1047	5.02301	19915.7	5.78274	12825.4	1.53734	1.55283	3.70593	30642.6	8.89741	7892.32	0.946026	3.88258	9.26606
3223.41	0.935953	8775.88	1.05194	0.367304	0.876596	10324.9	2.99794	5691.34	0.682203	1.81413	4.32956	10060.4	2.92115	9572.54	1.14743	1.05097	2.5082	19582.7	5.68605	8704.32	1.04336	2.24977	5.36923	14770.8	4.28885	6432.37	0.771027	2.29632	5.48032
2429.22	0.705349	7163.99	0.858724	0.339087	0.809255	9198.32	2.67083	7584.35	0.909111	1.2128	2.89444	11413.7	3.31411	5013.29	0.600927	2.2767	5.4335	14028.6	4.07334	6138.07	0.73575	2.2855	5.4545	15393.7	4.46973	4768.16	0.571544	3.22844	7.70489
2070.74	0.601262	4770.44	0.571817	0.434077	1.03596	11197.6	3.25135	8205.1	0.983518	1.36472	3.25699	10810.1	3.13884	5619.91	0.67364	1.92354	4.59066	18362.5	5.33176	5351.3	0.641443	3.43141	8.1893	12731.9	3.69685	7162.51	0.858547	1.77758	4.24231
2770.28	0.804382	8416.69	1.00888	0.329142	0.78552	9618.34	2.79279	6654.49	0.797652	1.44539	3.44953	12945.8	3.75896	7849.32	0.940872	1.64929	3.93615	20404.2	5.92459	7631.3	0.91474	2.67376	6.3811	18250.4	5.29922	5708.54	0.684264	3.19704	7.62997
2661.97	0.772932	6401.97	0.767383	0.415805	0.992347	8373.3	2.43128	9414.97	1.12854	0.889361	2.12252	13433.7	3.90062	7344.38	0.880347	1.82911	4.3653	13535.5	3.93018	6802.66	0.815413	1.98974	4.74865	21383.6	6.20897	7246.95	0.868668	2.95071	7.04207
1989.49	0.57767	4750.98	0.569484	0.418754	0.999384	10822.2	3.14236	8081.76	0.968735	1.33909	3.19584	14031.9	4.07431	5827.77	0.698556	2.40776	5.7463	13903	4.0369	8399.57	1.00683	1.65521	3.95027	19009.1	5.51951	6441.42	0.772112	2.95108	7.04295
2021.65	0.587009	6196.65	0.742773	0.326249	0.778616	10191.2	2.95914	6239.03	0.747852	1.63347	3.89838	15751.3	4.57356	6852.98	0.821444	2.29846	5.48543	13178.9	3.82664	7992.9	0.958083	1.64883	3.93504	17846.6	5.18196	5609.99	0.672451	3.18122	7.5922
2425.74	0.70434	6526.97	0.782366	0.371649	0.886965	9527.29	2.76635	6887.81	0.825619	1.38321	3.30113	9014.87	2.61757	5384.4	0.64541	1.67426	3.99573	13516.2	3.92457	7360.56	0.882287	1.8363	4.38245	14832.1	4.30665	9585.48	1.14898	1.54735	3.69285
3032.01	0.880378	6054.56	0.725741	0.500782	1.19515	10716.1	3.11153	9316.73	1.11677	1.1502	2.74502	10623.6	3.08468	4955.28	0.593973	2.1439	5.11656	13210.1	3.83568	9976.24	1.19582	1.32415	3.16018	7702.56	2.23652	7160.66	0.858325	1.07568	2.56718
4261.11	1.23726	7696.57	0.922563	0.553638	1.3213	11458.5	3.32709	5265.02	0.631101	2.17634	5.19398	7706.82	2.23776	4908.61	0.588379	1.57006	3.74706	13879.9	4.03017	8285.66	0.993174	1.67517	3.99791	16365.2	4.75182	4090.4	0.490302	4.00089	9.54839
4821.7	1.40003	14639.7	1.75481	0.329358	0.786035	12037.8	3.49531	7383.93	0.885087	1.63027	3.89076	11840	3.43787	6001.07	0.719329	1.97298	4.70865	12519.4	3.63514	9524.1	1.14162	1.31449	3.13713	19590.3	5.68827	6028.11	0.72257	3.24983	7.75595
2754.06	0.799671	6409.04	0.768231	0.429714	1.02554	11688.9	3.39399	7080.19	0.848679	1.65092	3.94005	8565.07	2.48696	5638	0.675809	1.51917	3.6256	10178.9	2.95556	10664.2	1.27829	0.954492	2.27796	25809.8	7.49417	8692.98	1.042	2.96905	7.08583
2991.39	0.868583	7846.82	0.940573	0.381223	0.909816	11317.4	3.28612	7511.74	0.900408	1.50662	3.59566	7203.83	2.09171	4927.22	0.59061	1.46205	3.48927							27698.4	8.04255	8152.32	0.977192	3.39761	8.10864
2903.99	0.843206	8248.87	0.988765	0.352048	0.840186	8974.89	2.60596	7963.97	0.954615	1.12694	2.68951	11747.2	3.41092	5977.43	0.716495	1.96525	4.69022							25827.4	7.49927	10977.4	1.31582	2.35278	5.61508
						13587.7	3.94533	12552.1	1.50458	1.0825	2.58347													14726.6	4.27602	14583.1	1.74803	1.00984	2.41005
						9772.71	2.83761	10689.2	1.28127	0.914264	2.18196													29639.6	8.60619	7658.6	0.918011	3.87011	9.23629
						7097.9	2.06095	6997.81	0.838805	1.0143	2.4207													29823	8.65944	9427.4	1.13003	3.16344	7.54977
						10828.6	3.14421	8633.64	1.03489	1.25424	2.99333													29890.2	8.67894	10192.7	1.22176	2.93252	6.99865
						8313.88	2.41403	8109.91	0.972108	1.02515	2.44659
						9192.72	2.66921	7058.75	0.84611	1.30231	3.10806

## Sheet: Nucleus
3sets	Ctl		HS		1h rec		2h rec		3h rec
N only	BP1	Hsc70	BP1	Hsc70	BP1	Hsc70	BP1	Hsc70	BP1	Hsc70
	1.00106	0.842761	0.767663	1.50082	0.937683	2.82582	0.903405	1.57919	0.950701	3.56704
	0.818906	0.694335	0.835181	1.47009	1.27289	3.03755	0.859077	1.80561	1.63321	3.84745
	0.941528	0.779348	0.745545	1.57002	1.35354	2.61475	0.987086	1.98312	1.61151	3.22379
	0.848384	0.694119	1.03247	1.97041	1.2642	3.23688	0.889739	2.13568	1.09564	3.12914
	1.20765	0.995054	0.703769	1.15777	1.16499	2.03266	0.922219	1.97462	1.59193	2.74159
	0.959955	0.766954	1.08911	1.96296	1.42697	3.29998	0.911832	2.02226	1.18703	4.00382
	0.995553	1.05931	1.05071	1.73629	1.31017	4.01392	0.892128	1.74619	1.06761	3.81656
	0.836956	0.709093	0.9565	1.6911	1.18148	3.95293	0.977628	2.07231	0.98292	2.87863
	1.09359	1.19806	0.864691	1.46069	1.45169	2.76474	1.11876	3.40801	0.909317	2.65808
	1.10709	1.19618	1.18139	2.02023	1.21746	2.6446	0.992141	2.16454	0.930965	3.01009
	0.865804	0.999492	1.00439	1.53464	1.12121	3.7783	1.02976	1.53241	0.749917	2.04378
	0.603118	0.654895	1.01166	1.82198	1.36001	3.53113	0.880238	1.81847	1.33178	3.31022
	1.0137	1.1181	1.10632	1.94277	1.32719	2.73353	1.11149	2.44552	0.732483	1.69429
	0.743723	0.909644	1.00707	1.58328	1.51654	2.36215	1.28643	2.69565	0.83414	3.09166
	1.00439	1.14235	0.87889	2.08134	1.01685	2.37524	1.08068	1.9416	1.4316	3.8495
	0.802307	1.07065	0.867107	2.10763	1.15592	2.8655	1.00295	2.10179	1.04582	3.05317
	0.967602	1.0243	1.03708	2.45053	1.33388	3.31443	1.49898	2.75934	1.07516	3.48506
	0.828527	1.08853	0.946945	1.80988	1.2969	3.15281	0.791693	1.39789	1.08405	3.76263
	0.780149	1.02801	0.878723	1.206	1.41118	3.27861	0.712217	1.43933	1.30483	2.80542
	0.920919	1.0064	0.907737	1.21592	1.6729	2.71306	0.922775	2.1675	0.988357	3.43601
	1.05834	0.971079	1.21876	2.72616	1.19158	2.71786	1.14137	2.09848	0.832782	1.97701
	1.04263	0.947471	1.2314	2.58439	1.20149	2.02795	0.969788	2.37402	0.905371	2.98313
	1.05451	0.947104	1.04537	2.3011	0.961037	1.98954	0.975366	1.90699	0.963255	2.05724
	0.930693	1.02753	0.945547	1.43331	1.1905	2.66082	0.890792	1.36447	1.41569	3.26428
	1.09844	1.01323	1.06943	1.53644	1.42571	2.65935	0.939734	1.67113	1.11917	2.67558
	1.02995	1.10271	0.851435	2.02223	1.31032	2.82719	0.894416	1.5947	1.33045	2.69644
	0.980631	0.927538	1.00216	1.70917	1.52568	2.78462	1.00759	1.57321	1.12592	3.53455
	0.861593	0.821391	1.03813	1.90432	1.3538	3.6854	0.97387	1.01866	1.01888	2.58952
	1.05215	1.17	0.869239	1.88111	1.44004	3.17283	0.689508	1.19882	1.07571	2.82267
	0.857538	0.891002	0.991264	1.74063	1.76489	3.54069	0.813503	1.93472	1.41756	2.49524
	1.14493	1.07484	1.07165	1.82051	1.39094	2.78551	0.662676	2.26248	1.13769	3.57145
	1.26835	1.38879	0.902933	1.47357	1.23882	1.88846	1.04429	1.3349	1.30262	2.38836
	1.16313	1.12847	0.740963	2.23305	1.23975	3.06737	1.01013	1.21213	0.786895	1.66767
	1.19689	1.15399	0.986274	1.95322	1.56008	2.7038	1.58772	0.759579	1.11955	2.547
	1.02032	1.04522	0.827527	1.56631	1.5455	2.85049	1.08168	2.04411	0.94005	2.11918
	1.25143	1.07116	0.632486	0.925082	1.37466	3.01489	0.685177	1.37843	0.850863	2.09152
	1.30572	1.13191	1.07264	1.31128	1.21459	3.44175	0.714973	1.47571	1.37974	2.34688
	1.11479	1.08052	0.872704	1.2578	1.70818	4.10692	0.817566	1.87975	0.920803	2.22333
	1.09693	1.12299	1.7374	2.48056	1.19968	2.78311	0.712556	1.25329	0.694517	2.18603
	1.13013	1.00547	1.27202	2.26991	1.17811	1.7831	0.602783	2.25195	1.22534	3.32003
	0.720449	0.958684	1.19901	2.15905	1.31528	2.8366	0.715366	1.98098	1.21988	2.96869
	0.945268	1.07502	1.44951	2.74698	1.01035	3.15245	0.726664	1.99562	0.971056	2.56957
	1.1771	0.819977	1.28482	2.41407	1.03512	2.82101	0.70901	1.96812	1.19856	3.00995
	1.19747	0.933327	1.47759	2.45551	0.940567	2.06912	0.974279	2.43008	1.33209	2.4909
	0.978382	0.970441	1.26457	2.40634	0.724795	1.5011	0.697314	2.43718	0.908312	2.72173
	1.06246	1.03034	1.03125	1.17672	0.767814	1.68332	0.636027	2.59812	0.76584	2.86433
	0.885526	1.12359	1.10558	1.42737	0.844474	3.10552	0.743693	2.61184	0.673325	2.82889
	0.73881	0.894219	1.16911	1.65753	0.818445	2.1047	0.619554	2.0511	0.829273	2.55585
	1.01809	1.12899	1.37123	2.14992	1.0649	2.5744	1.06751	2.57084	0.844261	2.08508
	0.97716	1.0753	1.39205	1.95859	0.894737	2.44435	0.846553	2.04851	1.22832	2.21359
	0.804336	0.754426	1.11668	1.80088	0.857866	2.1271	0.679945	1.49459	1.29342	2.52701
	1.01635	0.86972	1.05747	1.25416	0.895852	2.57599	0.470219	1.57424	0.725062	2.1513
	1.0509	0.828816	1.36021	1.97361	2.22897	2.35366	0.680437	2.46539	0.844382	2.40259
	1.01771	1.14702	0.741885	1.75903	1.30171	1.48772	0.642364	1.76477	0.911682	2.00937
	0.933962	0.888921	1.12934	1.9874	0.741097	2.76611	0.921699	2.02687	1.01331	2.46803
	0.77238	0.802108	0.641365	1.46645	0.872234	1.06285	0.794742	2.92014	1.05803	1.31874
	0.560286	0.75654	1.24152	2.03473	1.24471	3.03857	1.03425	2.25337	1.44424	2.60901
	0.630274	0.907454	0.64905	1.41233	1.1678	2.92429	1.08192	2.25576	1.0116	2.04229
	1.04505	1.03559	0.7638	1.87081	1.32178	3.04001	1.26249	2.00038	0.601444	2.89326
	0.919872	0.911907	1.21984	1.62234	1.12473	2.65309	0.653397	2.40497	0.827719	2.62359
	0.51003	0.552991	1.32251	2.18597	1.4717	2.9192	0.829701	2.09767	0.775202	2.80228
	1.19139	1.08194	0.856028	1.55191	1.02918	2.75521	0.88981	2.96907	1.10142	2.03936
	0.924468	0.881001	1.26222	1.9728	1.32461	2.79463	0.639123	2.98593	1.19058	1.93509
	1.0991	0.954516	1.29204	1.99792	1.11045	2.11006	0.947263	3.05095	0.738162	1.21854
	1.19477	1.11929	0.906684	1.63406	1.37158	2.73003	1.07797	2.41445	1.14085	1.9715
	1.26362	1.03793	0.872164	1.5843	1.44195	2.63253	0.616264	3.5114	0.771356	1.4536
	1.32637	1.0307	1.2118	1.89535	1.80035	2.29206	1.08601	2.12912	0.959628	1.46196
	1.17042	1.20506	0.911643	1.77122	0.981125	2.69173	1.21968	3.41202	0.722376	1.16382
	1.16255	1.2107	1.07472	1.81025	1.1942	2.31335	0.808606	3.16113	0.567085	1.49849
	1.10269	1.28765	1.15083	1.59173	1.09555	2.99436	0.903021	3.53086	0.536824	2.40069
	1.06954	1.32133	0.967439	1.18877	1.21143	2.56863	1.92882	2.02361	0.951692	1.26668
	1.07708	1.31618	1.30312	1.9627	1.31604	2.50075	1.37896	5.31346	0.788693	1.5891
	1.24602	1.11796	0.958236	1.29567	0.99645	2.76686	1.78601	1.57233	0.675041	1.15548
	1.03397	0.879599	1.09983	2.13405	1.10275	3.20318	1.18418	3.52009	0.736444	1.98149
	0.857397	0.892817	0.994368	2.02245	1.08396	2.60753	0.966829	4.5969	0.82143	1.34413
	0.945903	1.17406	0.980334	1.58049	1.15001	3.60071	1.06184	3.72969	0.936233	1.6215
	1.06929	1.04635	1.12827	2.18712	1.11015	2.75943	0.923814	3.59989	0.553977	1.87975
	1.14749	1.36173	1.08895	2.50215	0.992275	3.09334	0.889158	4.02597	0.498233	1.47408
	1.10936	1.09004	2.05129	3.5677	1.07731	2.1245	1.05768	3.26551	0.557459	1.97843
	1.07865	0.991298	2.00093	3.55645	1.16677	2.9458	0.933841	2.98393	0.965276	1.6999
	0.882345	0.806924	1.84802	4.29865	1.49235	3.73572	1.37516	2.82009	0.652375	1.50443
	1.09646	0.843587	1.95921	2.93777	1.20449	3.45784	0.929524	2.97997	0.814242	2.51597
	0.989257	0.883941	1.75339	3.49464	1.13479	2.15944	1.22303	3.71572	0.693046	2.80572
	1.21093	2.04711	1.82246	3.25442	1.34655	4.09928	1.05449	2.79012	1.0395	2.23883
	1.15677	1.82377	1.81594	4.85519	1.24567	3.68436	0.99057	3.26181	0.649685	2.20715
	0.749645	0.794467	1.90949	3.73378	0.954836	3.31139	1.17035	2.95892	1.08437	1.77272
	0.82144	0.972061	2.22835	3.53616	1.25359	2.86492	0.0140073	2.44719	0.621589	2.04269
	1.02458	1.01424	1.92183	2.9226	1.00811	3.54544	0.821857	2.01653	0.867556	1.84194
	0.838797	1.11668	1.6549	2.44979	1.19417	2.92833	0.857601	2.68729	0.601809	1.99984
	0.722903	0.734288	1.88107	3.34637	0.943098	3.52333	1.05304	1.81243	1.57734	2.49828
	0.851661	0.96019	1.67588	3.84018	1.17245	3.3077	0.840249	2.99805	1.05911	2.92607
	1.15062	1.009	2.13424	3.16815	1.13118	3.21802	1.33644	5.34722	1.01866	2.3714
	1.32566	1.25609	1.94611	2.33345	1.33399	2.83495	1.10001	2.89576	1.3824	2.93987
	0.866037	1.01395	2.12717	2.62342	1.04086	3.00313	1.04722	2.48134	1.23487	2.93897
	1.02832	1.00774	1.57147	2.66955	0.925486	3.3786	1.46775	4.70866	1.29911	2.41381
	0.782054	1.16717	1.8786	3.03698	1.17322	3.1707	1.21206	2.35423	1.83193	7.70706
	1.15679	1.43792	1.87488	2.47821	0.884286	3.24163	1.23806	2.16448	2.26492	10.3277
	0.894488	1.14327	1.75563	2.69089	1.00133	3.12786	1.2631	3.62208	1.72452	9.15101
	1.03297	0.850974	1.74386	3.23216	0.903924	2.77059	1.12572	4.00944	1.16321	7.93961
	0.9931	0.77697	1.95341	2.5136	0.970052	1.57618	1.01727	3.49532	1.78575	6.14831
	1.06495	0.894015	1.5864	3.00828	0.888798	3.87021	1.21291	4.44574	2.75804	4.41377
	1.71568	1.62609	1.80608	2.99794	1.58481	2.92115	1.10668	3.63224	2.06562	5.32193
	1.09041	0.960153	1.64088	2.67083	1.01485	3.31411	1.08371	3.38272	2.642	3.08914
	0.946133	0.865321	1.87031	3.25135	0.996595	3.13884	1.10063	3.1525	2.43159	3.17418
	1.00657	0.995183	1.69971	2.79279	1.21739	3.75896	1.03069	4.62777	1.44747	3.51043
	1.02209	0.81532	1.39367	2.43128	0.978795	3.90062	1.12613	4.29032	1.76458	3.11653
	1.18921	0.935953	1.68528	3.14236	0.821031	4.07431	1.13771	5.72152	1.46838	2.14327
	0.980289	0.705349	1.49362	2.95914	0.930745	4.57356	1.2335	4.81789	1.9376	7.50559
	0.897221	0.601262	1.89559	2.76635	1.0239	2.61757	1.15457	3.9053	2.39929	8.4346
	0.881746	0.804382	1.45285	3.11153	1.0587	3.08468	1.76652	7.91045	2.64664	3.9407
	0.850566	0.772932	1.75325	3.32709	1.15542	2.23776	1.57356	6.36908	1.68971	2.84047
	0.909576	0.57767	2.46984	3.49531	0.988043	3.43787	1.36232	4.83012	1.28304	4.68648
	0.903799	0.587009	1.46018	3.39399	1.1796	2.48696	1.50211	6.6825	2.17104	8.11926
	0.858332	0.70434	1.90972	3.28612	1.06533	2.09171	1.73524	5.78274	1.81038	5.93077
	0.969993	0.880378	1.72872	2.60596	1.14318	3.41092	1.64369	5.68605	2.00961	4.93539
	1.19868	1.23726	2.01978	3.94533			1.21139	4.07334	1.77642	4.74132
	1.11979	1.40003	1.64438	2.83761			1.36946	5.33176	2.06281	5.51357
	0.89943	0.799671	1.44605	2.06095			1.5607	5.92459	1.99025	8.89741
	0.913999	0.868583	1.56669	3.14421			1.07826	3.93018	1.27817	4.28885
	0.974794	0.843206	1.73545	2.41403			1.7184	4.0369	2.43293	4.46973
			1.50688	2.66921			0.993201	3.82664	2.03411	3.69685
							1.67805	3.92457	1.79671	5.29922
							1.34656	3.83568	2.08383	6.20897
							1.02099	4.03017	2.35956	5.51951
							1.01749	3.63514	1.1155	5.18196
							1.2446	2.95556	1.95474	4.30665
									3.19462	2.23652
									2.5987	4.75182
									2.27681	5.68827
									2.61855	7.49417
									2.31213	8.04255
									3.46805	7.49927
									1.54799	4.27602
									1.81654	8.60619
									1.75074	8.65944
									2.75062	8.67894

## Sheet: Cytoplasm 
3sets	Ctl		HS		1h rec		2h rec		3h rec
Cyt only	BP1	Hsc70	BP1	Hsc70	BP1	Hsc70	BP1	Hsc70	BP1	Hsc70
	1.0651	0.786348	1.06136	0.774031	1.35122	0.652341	1.37701	0.652021	1.25337	0.635285
	0.883498	0.736008	1.08839	1.09572	1.39699	0.624535	1.39433	0.541526	1.88151	0.816419
	0.920473	0.793451	1.03042	0.843132	1.53574	0.95026	1.19724	0.539681	2.77234	1.31896
	0.877465	0.708438	1.17787	1.11514	1.6778	1.03358	1.07171	0.668964	2.00015	0.875717
	1.27318	0.817644	1.0228	0.828162	1.53416	0.742052	1.30395	0.577154	2.1558	0.761574
	1.02458	0.80177	1.42097	1.14118	1.40182	0.742642	1.85467	0.861541	1.77847	0.729026
	0.748916	0.750968	1.15962	1.05241	1.91053	1.07518	1.46631	0.622455	1.04378	0.575134
	0.826389	0.656731	1.19705	1.27763	1.59934	0.955108	1.35281	0.77698	1.15309	0.713549
	0.965646	1.1876	1.0492	0.803944	2.05762	1.03437	1.66502	0.77933	1.73021	0.559449
	1.08548	1.29666	1.40036	1.01296	1.97848	1.03538	1.52121	0.829987	1.15886	0.521574
	0.926048	0.901498	1.08169	0.825951	1.39179	0.704615	1.25518	0.866612	1.11354	0.505425
	0.716248	0.723755	1.20341	1.24643	1.58232	0.981936	1.01836	0.595041	1.56912	0.659053
	1.19085	1.0741	1.21577	0.990335	1.70657	0.819631	1.68377	1.01316	0.940647	0.42098
	0.860976	0.958548	1.10391	0.927187	2.00687	0.945802	1.54367	0.729605	1.29144	0.5325
	0.949285	0.955517	0.867853	0.811679	1.54796	0.883534	1.8902	1.05927	1.66236	0.497386
	0.888316	0.934792	1.03619	0.995431	1.5531	0.706629	1.43369	1.04289	1.83427	0.772786
	0.962758	0.991671	1.08967	1.0373	1.50028	0.98367	1.37002	1.01304	1.1926	0.731356
	0.738089	1.00127	1.08308	0.989539	1.94483	0.998394	1.44072	0.433256	1.58262	0.840321
	0.746603	0.919788	1.10952	0.784651	1.6793	0.910991	1.46126	0.490993	1.44988	0.705351
	0.891169	0.996118	1.20004	0.868774	2.05502	1.02476	1.34654	0.505996	1.71399	0.67142
	0.968954	1.00064	1.441	1.43495	1.42228	0.806545	1.2764	0.435147	1.00848	0.419755
	1.02091	0.942801	1.29357	1.15607	1.69547	1.03	1.4088	0.68103	1.1276	0.633707
	1.00052	1.02467	1.48368	1.37115	1.39206	0.714454	1.67779	0.635352	1.35907	0.582573
	0.952757	1.14038	1.05212	0.785819	1.79793	0.968753	1.56368	0.562407	1.39115	0.680125
	1.11418	1.08313	1.48373	1.00636	2.13324	1.07336	1.08249	0.644201	1.60435	0.604
	0.950143	1.15344	1.01259	0.870628	2.00432	1.21189	1.08131	0.609099	1.86257	0.806551
	1.16187	1.11972	0.897204	0.683945	1.90295	0.8998	1.35246	0.577007	1.52017	0.667823
	0.953336	0.987148	1.02469	0.804534	2.03427	1.30468	1.24375	0.49554	1.46838	0.610482
	1.02697	1.12599	1.04486	0.85486	1.90577	1.26849	1.12841	0.530169	1.72095	0.825622
	0.88475	1.02795	0.941908	0.694652	2.29996	1.31803	1.45212	0.58329	1.85371	1.1258
	1.0666	0.938948	0.920069	0.68236	2.95414	1.3928	1.117	0.494302	1.7037	1.09831
	1.23763	1.28481	1.21036	0.826198	2.15012	0.848998	1.28891	0.606866	1.43876	0.888418
	1.08445	1.2137	0.849337	0.760996	1.51267	0.9179	1.37058	0.689501	1.35855	0.508562
	1.27155	1.30315	1.09482	0.932933	1.84709	0.988584	1.13569	0.473516	1.56988	0.667506
	1.02295	1.03718	1.00677	0.861903	2.31695	1.20923	1.47236	0.608272	1.53688	0.535757
	1.13001	0.931325	0.933238	0.850335	1.70799	0.9168	1.31146	0.617084	1.32177	0.57253
	1.17802	1.13939	1.09203	0.762058	1.58731	0.9959	1.14398	0.562384	1.61955	0.473435
	1.13452	1.16561	1.42441	1.0174	1.95965	1.35567	1.24202	0.662017	1.08134	0.385687
	1.13966	1.29577	1.53495	1.00779	1.94747	0.983513	0.914142	0.475579	1.46771	0.607148
	1.15917	1.09156	1.32659	1.00541	1.95124	0.889181	1.14644	0.631856	1.40627	0.515093
	0.836817	0.880283	1.37165	0.912445	1.75679	0.942978	1.41462	0.662989	1.52933	0.64025
	1.04113	1.10305	1.31023	0.874988	1.21053	0.615953	1.26673	0.668305	1.42203	0.664703
	1.2171	0.952082	1.38964	0.924854	1.23111	0.760142	1.15723	0.625488	1.40349	0.728215
	1.34585	1.14308	1.28436	0.736245	1.01344	0.435094	1.2905	0.703157	1.29611	0.519073
	1.18493	1.2448	1.30151	0.9873	1.09083	0.415845	1.42344	0.852446	1.11194	0.560487
	0.849596	0.777482	1.06612	0.667293	1.01502	0.496508	0.859468	0.68095	0.880582	0.545546
	0.866383	0.990821	1.08979	0.548416	0.986879	0.480328	0.894225	0.343159	1.01257	0.479994
	0.788227	0.828316	1.07892	0.653885	1.06659	0.708912	1.08728	0.428309	1.00082	0.437646
	0.973854	0.963806	1.12378	0.533429	1.05275	0.678789	0.524832	0.274777	1.07343	0.380774
	1.06987	1.05537	1.12053	0.656653	0.656662	0.362557	0.819239	0.427317	1.04551	0.532574
	1.02159	0.952504	0.995319	0.561968	0.824815	0.547285	0.751908	0.506193	0.777784	0.254491
	1.26263	1.02987	1.09933	0.701322	1.27143	0.615438	0.959666	0.461607	1.05278	0.381144
	0.763538	0.70578	1.39601	1.14262	2.09563	1.31442	0.957858	0.367511	1.00012	0.261517
	1.08973	1.12239	0.899005	0.713093	0.398625	0.219454	1.18249	0.512511	1.19346	0.340072
	0.923368	0.789425	0.929804	0.623238	0.72671	0.553358	0.95571	0.338855	1.13579	0.34926
	0.802303	0.842257	0.531614	0.356448	0.755272	0.334826	1.41813	0.847854	1.57211	0.616618
	0.49177	0.673307	0.931459	0.555001	1.08702	0.532788	1.33621	0.614164	1.02867	0.31383
	0.576363	0.958351	0.923701	0.680898	0.82883	0.372909	1.35264	0.639064	1.2975	0.415529
	0.91696	0.825599	0.71132	0.472865	0.98092	0.446683	1.42017	0.58894	0.664181	0.258996
	0.773547	0.743634	1.26617	0.952378	1.00751	0.577424	0.952007	0.837007	0.816161	0.348755
	0.465051	0.428393	1.2125	0.92058	1.46236	0.754958	1.42259	0.857474	0.971202	0.322874
	1.17337	1.22209	0.942929	0.708883	1.43839	0.852802	1.10157	0.586138	0.98793	0.355141
	1.26384	1.21604	0.943771	0.670276	1.49441	0.81979	1.1399	0.586268	1.16872	0.290055
	1.37046	1.33389	1.08114	0.696436	1.16763	0.527121	1.3186	0.552905	0.647472	0.32466
	1.078	1.21353	0.895926	0.574171	1.55666	0.903125	0.788431	0.625532	1.20879	0.431211
	1.13223	1.0358	1.05627	0.814228	1.24829	0.643401	1.02845	0.5638	1.02595	0.471959
	1.00352	0.962101	1.03055	0.524945	1.25924	0.803982	1.02971	0.793862	1.2314	0.210889
	1.14346	1.23197	0.823727	0.614162	1.29918	0.700456	1.32912	0.719853	1.08669	0.248202
	1.11815	1.18161	1.15078	0.548586	1.43118	0.820668	1.16573	0.454087	0.676815	0.181389
	1.32002	1.28966	1.31549	0.841564	1.28424	0.556546	1.215	0.528908	0.624457	0.145256
	1.16948	1.35576	0.999301	0.563878	1.18306	0.668044	1.80719	1.27573	1.24725	0.172671
	0.869439	1.04807	1.03504	0.649056	1.2613	0.496913	1.57745	0.712736	1.08087	0.24328
	1.10612	1.03566	1.24466	0.739567	0.995313	0.725743	2.20384	1.51929	1.08604	0.212154
	1.11984	1.00789	1.1536	0.675165	1.259	0.708954	1.7826	0.54341	0.900993	0.296368
	0.951501	1.16477	0.891539	0.54239	1.27544	0.625167	1.65151	0.779556	0.906417	0.240269
	0.946653	0.916732	1.03495	0.64223	1.18823	0.69997	1.71914	0.850394	1.05868	0.33525
	1.06603	1.13351	1.04543	0.580491	1.22061	0.596456	1.95709	0.988086	0.685278	0.27856
	0.944799	1.10714	1.03402	0.650524	1.00202	0.672212	1.58078	0.592098	0.623565	0.209162
	0.678473	0.694804	1.73498	0.862498	1.00171	0.741435	0.799189	0.48223	0.568657	0.270374
	1.10326	1.06486	1.78092	0.932323	1.2056	0.522883	1.56847	0.794095	0.831715	0.212983
	0.853311	0.888171	1.48019	0.960212	1.13531	0.675601	1.78652	0.729411	0.641667	0.251454
	1.08629	0.951529	2.02671	0.950998	1.21369	0.653238	1.29821	0.548847	0.556635	0.151024
	1.24113	0.933804	1.45851	0.728229	0.871828	0.663301	1.09923	0.622812	0.97577	0.306054
	1.10445	1.14842	1.58442	1.22438	1.17238	0.698917	1.29185	0.533923	1.13259	0.223473
	0.968537	1.13649	1.54322	0.950779	1.28411	0.869747	1.27178	0.691243	0.752697	0.288725
	0.78865	0.733999	1.48276	0.75285	0.942069	0.522714	1.6535	0.802948	1.0308	0.312093
	0.810666	0.868763	2.50326	1.67042	1.21573	0.855667	0.0161318	1.08861	0.706678	0.22034
	0.89703	0.838097	1.41828	0.760054	0.887861	0.510012	0.91653	0.615684	0.792389	0.208891
	0.583347	0.743455	1.18095	0.572925	0.762284	0.515007	1.42593	0.740968	0.857708	0.369008
	0.751472	0.687572	1.32647	0.742859	0.954162	0.602146	0.981346	0.534723	1.37561	0.35127
	1.01067	1.31198	1.3059	0.796938	1.09674	0.481397	1.36337	0.766774	1.09556	0.346007
	1.1086	0.93362	1.73113	0.85986	1.06857	0.537743	1.40234	1.1124	1.21258	0.616108
	1.50629	1.36582	1.43414	0.901271	1.37107	0.881895	1.36491	1.29394	1.20397	0.45776
	1.0299	1.34311	1.90544	1.1374	1.01723	0.590022	1.03348	1.04502	1.2035	0.359594
	1.12023	1.04221	1.35465	0.756765	1.01344	0.633863	1.24874	0.852852	1.43627	0.296592
	0.913293	1.1305	1.52562	0.735941	1.16133	0.637897	1.24964	1.09103	1.62689	0.88464
	1.44335	1.71502	1.83143	0.844823	0.825304	0.629997	1.13501	1.16883	1.72359	1.02114
	0.896299	1.0037	1.53169	0.704726	0.891192	0.563213	1.43632	1.24952	1.59395	0.886376
	1.15595	1.0652	1.41923	0.904538	0.979459	0.7099	1.43475	1.06393	1.47439	0.913641
	0.925428	0.832856	1.45051	0.723047	0.817662	0.632025	1.44835	1.00439	1.56769	0.94029
	1.11902	1.04088	1.18037	0.840299	1.12216	0.75911	1.49788	1.03761	2.02034	1.2864
	1.30681	1.12972	1.06343	0.682203	1.51736	1.14743	1.133	1.15763	1.76118	0.877858
	1.11093	1.20171	1.43185	0.909111	1.07579	0.600927	1.21405	1.23687	1.97067	0.959267
	0.909308	1.02202	1.38279	0.983518	1.11129	0.67364	1.08398	1.47822	1.67506	1.04835
	0.919599	1.1996	1.42714	0.797652	1.36948	0.940872	1.44886	1.18688	1.39395	0.425789
	1.13146	1.05123	1.66844	1.12854	1.11852	0.880347	1.71014	1.1256	1.85821	0.899101
	1.08813	1.05194	1.58081	0.968735	1.05552	0.698556	1.46954	1.14437	1.32899	0.840821
	1.09197	0.858724	1.17587	0.747852	0.974408	0.821444	1.50375	0.943598	1.63826	0.759625
	0.875876	0.571817	1.42535	0.825619	0.991681	0.64541	1.2491	1.17596	1.89901	0.767758
	0.966367	1.00888	1.33986	1.11677	1.12385	0.593973	1.56212	1.00345	2.29461	0.842762
	0.874647	0.767383	1.1891	0.631101	0.830984	0.588379	1.25129	1.02699	1.66362	0.708361
	0.779908	0.569484	1.80561	0.885087	1.17377	0.719329	0.600086	0.882804	1.35529	0.533192
	1.10587	0.742773	1.07541	0.848679	1.09502	0.675809	0.942611	0.773876	1.47536	0.869585
	0.789641	0.782366	1.47807	0.900408	0.878874	0.59061	1.08287	1.53734	2.03104	0.906005
	0.855783	0.725741	1.66158	0.954615	1.10634	0.716495	1.33162	1.04336	1.41879	0.52199
	0.851337	0.922563	1.73464	1.50458			0.960585	0.73575	1.92305	0.886535
	1.16894	1.75481	1.64627	1.28127			1.0429	0.641443	1.6942	0.949409
	0.851679	0.768231	1.25813	0.838805			1.39588	0.91474	1.4789	0.946026
	1.05939	0.940573	1.29365	1.03489			1.01607	0.815413	1.391	0.771027
	1.12917	0.988765	1.56859	0.972108			1.37409	1.00683	1.85058	0.571544
			1.32357	0.84611			1.16395	0.958083	1.69318	0.858547
							1.57947	0.882287	1.41938	0.684264
							1.95437	1.19582	1.74876	0.868668
							1.18764	0.993174	1.67209	0.772112
							1.38253	1.14162	1.51972	0.672451
							1.46355	1.27829	1.63805	1.14898
									1.48815	0.858325
									1.83784	0.490302
									1.40267	0.72257
									1.78419	1.042
									1.88377	0.977192
									2.23541	1.31582
									1.70446	1.74803
									1.92064	0.918011
									1.74494	1.13003
									2.14121	1.22176

## Sheet: N over C 
3sets	Ctl		HS		1h rec		2h rec		3h rec
N/C ratio	BP1	Hsc70	BP1	Hsc70	BP1	Hsc70	BP1	Hsc70	BP1	Hsc70
	0.937601	1.06296	0.721537	1.92309	0.692278	4.29634	0.65448	2.40216	0.756682	5.56887
	0.924653	0.935652	0.765499	1.33068	0.908966	4.82385	0.614633	3.30699	0.865939	4.67399
	1.0204	0.97418	0.72179	1.84687	0.879229	2.72907	0.82248	3.64451	0.57988	2.42416
	0.964524	0.971762	0.87444	1.7525	0.751668	3.10607	0.828198	3.16636	0.546453	3.54396
	0.946239	1.20701	0.686422	1.38655	0.757537	2.7168	0.705546	3.39328	0.736658	3.57041
	0.934667	0.948739	0.764605	1.70603	1.01548	4.40717	0.490455	2.32803	0.665833	5.44702
	1.32612	1.39904	0.903894	1.6363	0.68411	3.70265	0.606949	2.78236	1.02036	6.58159
	1.01034	1.07089	0.797118	1.31278	0.736946	4.10482	0.720921	2.64529	0.850367	4.0012
	1.12976	1.00054	0.822154	1.80202	0.703815	2.65098	0.6703	4.33717	0.524283	4.71233
	1.01744	0.914958	0.841593	1.97805	0.613867	2.53331	0.650629	2.58655	0.801408	5.7239
	0.932688	1.09962	0.926292	1.84281	0.803646	5.3183	0.818428	1.75379	0.671829	4.01056
	0.840019	0.897446	0.83863	1.44979	0.857427	3.56663	0.862283	3.03101	0.846693	4.98155
	0.84919	1.03244	0.907778	1.94566	0.77582	3.30775	0.658524	2.394	0.776821	3.99168
	0.861728	0.941208	0.91007	1.69363	0.753849	2.47705	0.831348	3.66441	0.64434	5.75838
	1.0555	1.18574	1.01027	2.54323	0.655312	2.66632	0.570345	1.81794	0.859103	7.67606
	0.900997	1.13596	0.834802	2.09996	0.742468	4.02194	0.697873	1.99885	0.568779	3.91849
	1.0026	1.02444	0.949441	2.34307	0.88694	3.34185	1.09149	2.70151	0.899346	4.72617
	1.11982	1.07824	0.872194	1.81403	0.665234	3.13201	0.548185	3.20006	0.683318	4.44093
	1.04241	1.1085	0.790071	1.5244	0.838308	3.56947	0.486221	2.90744	0.897787	3.94476
	1.03089	1.00205	0.754597	1.38811	0.812088	2.62581	0.683638	4.24854	0.575249	5.07561
	1.08962	0.962512	0.843729	1.88426	0.835774	3.34215	0.892048	4.78297	0.823785	4.67132
	1.01881	0.996721	0.949639	2.21718	0.706934	1.95276	0.686716	3.45738	0.800981	4.66886
	1.05142	0.916726	0.702876	1.66447	0.688702	2.76189	0.579938	2.97688	0.707049	3.50237
	0.974483	0.893655	0.896533	1.80903	0.660551	2.72415	0.568302	2.40626	1.01519	4.76021
	0.983486	0.927804	0.719035	1.51422	0.666718	2.4573	0.86603	2.57286	0.695901	4.39348
	1.08138	0.948187	0.838819	2.3037	0.652172	2.31377	0.825163	2.59669	0.712583	3.31579
	0.841973	0.82158	1.11428	2.47853	0.799808	3.06936	0.743204	2.70417	0.738863	5.24929
	0.901584	0.825269	1.01067	2.3476	0.663889	2.80162	0.781121	2.03882	0.6922	4.20701
	1.02204	1.03058	0.829912	2.18246	0.753796	2.48077	0.609566	2.24269	0.623561	3.39083
	0.966903	0.859673	1.04986	2.48524	0.765505	2.66435	0.558864	3.28975	0.762871	2.19826
	1.07085	1.13536	1.16194	2.6461	0.469707	1.98355	0.591829	4.53962	0.666162	3.22514
	1.02235	1.07207	0.744203	1.76895	0.574769	2.20612	0.808259	2.18163	0.90319	2.66631
	1.06996	0.922164	0.870295	2.91034	0.817598	3.31435	0.735228	1.74359	0.577818	3.25232
	0.93901	0.878281	0.898683	2.07648	0.842575	2.71262	1.39465	1.59098	0.711419	3.78443
	0.995029	0.999489	0.819976	1.80239	0.665429	2.33796	0.732882	3.33299	0.610185	3.92308
	1.10477	1.14072	0.676096	1.07899	0.802899	3.26155	0.521193	2.21548	0.642178	3.6232
	1.10573	0.985297	0.979875	1.70661	0.763341	3.42761	0.623477	2.60253	0.849873	4.91652
	0.98024	0.919408	0.599803	1.20957	0.86957	3.00464	0.656667	2.81617	0.849482	5.71739
	0.960181	0.859561	1.1081	2.40818	0.614532	2.80658	0.777598	2.6137	0.472056	3.571
	0.972595	0.913586	0.938707	2.2089	0.602319	1.9889	0.524516	3.53483	0.869233	6.39268
	0.842846	1.06553	0.855761	2.31508	0.746876	2.98349	0.504474	2.96348	0.795734	4.59879
	0.888842	0.953526	1.08306	3.07159	0.817097	5.0074	0.572268	2.96163	0.681219	3.83408
	0.946805	0.842632	0.905141	2.5538	0.823133	3.63095	0.611197	3.12076	0.851925	4.09947
	0.871049	0.798857	1.12627	3.2631	0.908588	4.65279	0.75314	3.42764	1.00616	4.69504
	0.808337	0.762748	0.951193	2.38461	0.650479	3.53174	0.479585	2.79725	0.7997	4.75105
	1.22427	1.29659	0.946967	1.72531	0.740555	3.31704	0.724471	3.73298	0.851419	5.13692
	1.00061	1.10949	0.993166	2.54646	0.837717	6.32568	0.814183	7.44666	0.650989	5.76622
	0.917606	1.05623	1.06082	2.48011	0.751218	2.90475	0.557845	4.68534	0.811178	5.71377
	1.02345	1.14607	1.19455	3.94326	0.990279	3.71066	1.99126	9.15389	0.769979	5.35755
	0.894145	0.996859	1.2162	2.91823	1.33392	6.59627	1.01162	4.69028	1.15016	4.06657
	0.770787	0.774927	1.09835	3.13534	1.01821	3.80263	0.885288	2.8888	1.62801	9.71506
	0.788032	0.826244	0.941708	1.74962	0.689793	4.09515	0.479684	3.33664	0.674235	5.52234
	1.34743	1.14895	0.953873	1.68994	1.04127	1.75194	0.695444	6.56337	0.826537	8.98859
	0.914276	0.99986	0.807884	2.41345	3.19686	6.6327	0.531814	3.36897	0.747843	5.78097
	0.990215	1.1017	1.18907	3.11991	0.998365	4.89073	0.944144	5.85227	0.873419	6.91372
	0.942471	0.931749	1.18109	4.02516	1.13059	3.10573	0.548636	3.36971	0.658858	2.09245
	1.11538	1.09933	1.30486	3.58694	1.12101	5.5799	0.75775	3.58971	1.37448	8.13379
	1.07055	0.926426	0.687895	2.02939	1.37936	7.67235	0.783047	3.45349	0.763268	4.80869
	1.11573	1.22723	1.05121	3.87082	1.31917	6.65865	0.870288	3.32316	0.88651	10.9296
	1.16417	1.19978	0.943155	1.66664	1.09289	4.4954	0.671912	2.8112	0.992847	7.36014
	1.07367	1.26295	1.06781	2.32324	0.985239	3.78313	0.570973	2.39346	0.781413	8.49161
	0.994018	0.866191	0.888759	2.14192	0.700472	3.16095	0.790792	4.956	1.09145	5.6183
	0.716101	0.708827	1.30931	2.87965	0.867748	3.33528	0.548899	4.98304	0.997296	6.52728
	0.785137	0.700125	1.16995	2.80677	0.931041	3.91648	0.703286	5.39878	1.11611	3.67215
	1.08503	0.902408	0.990739	2.78444	0.862583	2.95754	1.3385	3.77642	0.923962	4.4732
	1.09259	0.980397	0.808351	1.90371	1.13086	4.00316	0.58662	6.09348	0.736047	3.01336
	1.29394	1.04815	1.15116	3.53253	1.39966	2.78927	1.03251	2.62401	0.762917	6.78254
	1.00206	0.957016	1.08347	2.82163	0.739316	3.75978	0.898374	4.63745	0.650781	4.58767
	1.01786	1.00248	0.914281	3.22853	0.816882	2.75794	0.679072	6.81106	0.820263	8.08263
	0.817806	0.976864	0.856444	1.85052	0.83514	5.26396	0.727609	6.53149	0.841598	16.1701
	0.895326	0.953537	0.947769	2.06263	1.00246	3.7619	1.04487	1.55196	0.746995	7.17725
	1.21279	1.22866	1.23254	2.95857	1.02147	4.9238	0.855798	7.2939	0.71435	6.39081
	1.1028	1.05614	0.753694	1.71407	0.980101	3.73006	0.793375	1.01255	0.608501	5.32874
	0.903908	0.853848	0.933351	3.09247	0.857486	4.42053	0.650339	6.33777	0.80019	6.5414
	0.882161	0.749948	1.0919	3.64818	0.832015	4.08079	0.573118	5.76937	0.887193	5.47338
	0.978208	1.25302	0.92732	2.40775	0.947491	5.03291	0.604675	4.29105	0.865754	4.73216
	0.981981	0.903156	1.05656	3.68628	0.890392	4.5264	0.462114	3.56455	0.791408	6.60224
	1.18901	1.20337	1.03099	3.76324	0.969463	4.50229	0.55066	6.65254	0.782215	6.89521
	1.60071	1.53494	1.16732	4.07534	1.06183	2.82305	1.29563	6.62534	0.959705	7.15925
	0.957146	0.910796	1.10929	3.75825	0.955528	5.55052	0.582871	3.67643	1.13619	7.80888
	1.01229	0.888888	1.23268	4.41061	1.29782	5.44776	0.753566	3.7827	0.99532	5.85363
	0.988152	0.867399	0.954442	3.0435	0.979836	5.21516	0.700959	5.31216	1.43205	16.2993
	0.780312	0.926144	1.18693	4.72791	1.28512	3.20749	1.08924	5.8371	0.695328	8.96926
	1.08251	1.75621	1.13566	2.61874	1.13399	5.77851	0.799106	5.11276	0.898522	9.80182
	1.1792	1.58103	1.16181	5.03108	0.957771	4.17353	0.762517	4.61678	0.845002	7.47925
	0.938493	1.06639	1.27147	4.88624	1.0007	6.24138	0.692929	3.60543	1.02985	5.55733
	1.00044	1.10237	0.878896	2.08564	1.01807	3.2987	0.850052	2.19941	0.861106	9.07027
	1.12771	1.19229	1.33787	3.78843	1.12105	6.84895	0.877859	3.20448	1.07185	8.62711
	1.41968	1.47982	1.38357	4.21274	1.54671	5.60197	0.588793	3.54835	0.686901	5.30236
	0.949788	1.05216	1.40012	4.43815	0.975875	5.76483	1.05051	3.31622	1.12255	6.95843
	0.831986	0.72105	1.26705	4.74746	1.05549	6.76951	0.60335	3.82544	0.946407	8.27391
	1.02475	1.06477	1.21724	3.63005	1.04517	5.89588	0.940925	4.73588	0.822425	3.76581
	0.868925	0.906064	1.33978	2.55081	0.960623	3.16712	0.795709	2.20487	1.12407	6.2835
	0.830235	0.743769	1.10222	2.27243	1.01026	5.01464	1.00045	2.33935	1.00451	7.99639
	0.90632	0.952634	1.14535	3.47546	0.901636	5.25141	1.16049	5.43949	0.885494	7.9626
	0.845446	1.01718	1.21576	4.06568	0.997435	4.8971	0.957638	2.12592	1.11175	8.58335
	0.791302	0.826039	1.01075	2.89007	1.05788	5.06944	1.07696	1.82447	1.29741	9.96441
	0.985328	1.12223	1.13167	3.76193	1.10934	5.47154	0.868251	2.85594	1.0682	10.1715
	0.882289	0.787082	1.21316	3.52047	0.911182	3.84511	0.774664	3.71283	0.778941	8.56166
	1.05952	0.919112	1.32963	3.42502	1.17133	2.457	0.693462	3.42863	1.12466	6.44212
	0.939617	0.84621	1.32695	3.52711	0.782005	5.02301	0.799485	4.22129	1.34783	3.3804
	1.29623	1.41811	1.67682	4.32956	1.03121	2.5082	0.964383	3.09128	1.15799	5.97282
	0.96908	0.787184	1.13146	2.89444	0.931397	5.4335	0.881328	2.69448	1.32367	3.17272
	1.02731	0.834169	1.33542	3.25699	0.885426	4.59066	1.00249	2.10111	1.43324	2.98303
	1.0807	0.817336	1.17589	3.44953	0.877674	3.93615	0.702365	3.84149	1.02523	8.1227
	0.891884	0.764128	0.824722	2.12252	0.863985	4.3653	0.650153	3.75526	0.937573	3.41506
	1.07905	0.876596	1.05257	3.19584	0.767989	5.7463	0.764382	4.92581	1.09088	2.51135
	0.886342	0.809255	1.25412	3.89838	0.943082	5.48543	0.809887	5.03042	1.16773	9.73464
	1.01138	1.03596	1.31305	3.30113	1.01941	3.99573	0.912606	3.27186	1.24743	10.8237
	0.900867	0.78552	1.07058	2.74502	0.930086	5.11656	1.11651	7.76673	1.1388	4.60684
	0.96014	0.992347	1.45574	5.19398	1.37279	3.74706	1.24161	6.11007	1.00281	3.95066
	1.15148	0.999384	1.35053	3.89076	0.8311	4.70865	2.24143	5.39048	0.93469	8.6596
	0.806912	0.778616	1.34058	3.94005	1.06359	3.6256	1.57336	8.5075	1.45287	9.19896
	1.07321	0.886965	1.27566	3.59566	1.19679	3.48927	1.58213	3.70593	0.880058	6.44934
	1.11909	1.19515	1.02722	2.68951	1.0202	4.69022	1.21871	5.36923	1.39847	9.31524
	1.39014	1.3213	1.14962	2.58347			1.24511	5.4545	0.912042	5.26912
	0.945811	0.786035	0.986192	2.18196			1.29647	8.1893	1.20213	5.72155
	1.04268	1.02554	1.13479	2.4207			1.1039	6.3811	1.3287	9.26606
	0.851822	0.909816	1.19571	2.99333			1.04775	4.74865	0.907239	5.48032
	0.852337	0.840186	1.09235	2.44659			1.23472	3.95027	1.29802	7.70489
			1.12406	3.10806			0.842482	3.93504	1.18613	4.24231
							1.04895	4.38245	1.24979	7.62997
							0.680266	3.16018	1.1765	7.04207
							0.848789	3.99791	1.39326	7.04295
							0.726632	3.13713	0.724715	7.5922
							0.839618	2.27796	1.1782	3.69285
									2.11949	2.56718
									1.39607	9.54839
									1.60261	7.75595
									1.44903	7.08583
									1.21184	8.10864
									1.53175	5.61508
									0.896684	2.41005
									0.933809	9.23629
									0.990604	7.54977
									1.26833	6.99865
