# Supplementary material for: Quantitative analysis of the interplay between hsc70 and its co-chaperone HspBP1
Source: PeerJ. 2015 Dec 21;3:e1530. doi: 10.7717/peerj.1530 (PMC4690350; doi:10.7717/peerj.1530)
Supplement: Supplemental Information 3 [file peerj-03-1530-s003.xlsx]

## Sheet: set3 3h Rec
3h Rec	Cell: Total Area	Cell: W2 Nucleus Integr Intensity	BP1/Area	Cell: W3 Nucleus Integr Intensity	Hsc70/Area
	3.03619	40060	13194.2	40060	13194.2
	3.05565	50402	16494.7	50402	16494.7
	3.05565	70920	23209.5	70920	23209.5
	3.32813	55818	16771.6	55818	16771.6
	3.83416	100990	26339.5	100990	26339.5
	4.00932	105341	26274	105341	26274
	4.00932	82553	20590.3	82553	20590.3
	4.24288	51116	12047.5	51116	12047.5
	5.19655	274384	52801.2	274384	52801.2
	6.03345	113483	18809	113483	18809
	6.15023	64259	10448.2	64259	10448.2
	6.22808	158038	25375.1	158038	25375.1
	6.83142	107712	15767.1	107712	15767.1
	7.22068	69698	9652.56	69698	9652.56
	7.45423	102107	13697.9	102107	13697.9
	7.47369	139240	18630.7	139240	18630.7
	7.88241	212810	26998.1	212810	26998.1
	9.0891	178250	19611.4	178250	19611.4
	9.78976	259763	26534.2	259763	26534.2
	12.1448	277144	22820.1	277144	22820.1
	12.3005	187604	15251.8	187604	15251.8
	12.4951	164769	13186.7	164769	13186.7
	12.8649	347427	27005.9	347427	27005.9
	13.4877	165297	12255.4	165297	12255.4
	13.7018	159449	11637.1	159449	11637.1
	14.091	334707	23753.2	334707	23753.2
	20.0272	488223	24378	488223	24378
	2.95834	87422	29551.1	87574	29602.4
	2.95834	66790	22576.9	66942	22628.3
	3.26974	60843	18607.9	61010	18659
	6.46163	175637	27181.5	175968	27232.8
	7.00659	93587	13357	93931	13406.1
	7.20121	91801	12748	92159	12797.7
	11.3273	199259	17591	199835	17641.9
	2.88049	48663	16894	48369	16792
	2.89995	90084	31064	89786	30961.2
	3.23082	52146	16140.2	51814	16037.4
	3.46437	63296	18270.6	62942	18168.4
	3.52276	93278	26478.7	92916	26375.9
	3.659	190237	51991.6	189861	51888.8
	3.77577	58278	15434.7	57892	15332.5
	3.93147	57989	14749.9	57609	14653.3
	4.8073	86830	18062.1	86342	17960.6
	4.92407	65414	13284.5	64921	13184.4
	4.94354	86100	17416.7	85602	17315.9
	5.15763	226644	43943.5	226114	43840.7
	5.17709	84071	16239	83558	16140
	6.16969	84856	13753.7	84238	13653.5
	6.16969	118695	19238.4	118074	19137.8
	6.20861	104162	16777	103538	16676.5
	7.45423	162453	21793.4	161699	21692.2
	7.62939	189288	24810.4	188506	24707.9
	8.11596	179418	22106.8	178592	22005
	8.46629	161488	19074.2	160620	18971.7
	9.90654	151164	15259	150166	15158.3
	10.1985	174491	17109.5	173474	17009.8
	11.2689	186623	16560.8	185485	16459.9
	13.6045	200750	14756.2	199391	14656.3
	2.88049	72940	25322.1	72792	25270.7
	3.03619	26742	8807.76	26600	8760.99
	3.11404	70616	22676.7	70456	22625.3
	3.36705	108468	32214.5	108295	32163.1
	3.38652	62780	18538.2	62607	18487.1
	3.40598	51310	15064.7	51148	15017.1
	3.48383	43329	12437.2	43164	12389.8
	3.659	61931	16925.7	61748	16875.7
	3.9704	69109	17406.1	68909	17355.7
	5.25494	85767	16321.2	85502	16270.8
	5.48849	175948	32057.6	175666	32006.2
	5.64419	80691	14296.3	80410	14246.5
	5.72205	158465	27693.8	158172	27642.6
	6.24754	118670	18994.7	118357	18944.6
	6.267	112953	18023.4	112634	17972.5
	6.55894	115588	17623	115254	17572
	6.67572	116493	17450.3	116155	17399.6
	6.90927	115858	16768.5	115508	16717.8
	6.96766	98170	14089.4	97827	14040.1
	7.33745	133713	18223.4	133355	18174.6
	7.57101	161533	21335.7	161154	21285.7
	7.59047	134174	17676.6	133792	17626.3
	7.72671	156557	20261.8	156167	20211.3
	7.76563	79412	10226.1	79056	10180.2
	8.58307	197162	22971	196726	22920.2
	8.73877	162107	18550.3	161662	18499.4
	9.18641	113739	12381.2	113291	12332.5
	9.61459	195581	20342.1	195094	20291.4
	10.5293	228906	21739.8	228370	21688.9
	12.5924	332642	26416.1	331995	26364.7
	14.8306	327743	22099.1	327001	22049.1
	3.01672	221797	73522.4	221487	73419.7
	3.26974	103338	31604.3	103002	31501.6
	3.62007	69751	19267.9	69381	19165.7
	3.83416	75040	19571.4	74650	19469.7
	3.98986	45816	11483.1	45423	11384.6
	4.45697	125733	28210.4	125275	28107.7
	5.19655	71830	13822.6	71315	13723.5
	5.70258	105159	18440.6	104580	18339.1
	6.46163	120343	18624.2	119683	18522.1
	7.99919	168040	21007.1	167224	20905.1
	8.33005	236566	28399.1	235714	28296.8
	9.41997	121269	12873.6	120343	12775.3
	10.3736	110141	10617.4	109146	10521.5
	11.6971	131035	11202.3	129891	11104.5
	13.0011	269682	20743	268370	20642.1
	13.3125	205644	15447.4	204318	15347.8
	15.4923	219982	14199.4	218449	14100.5
	19.7741	241391	12207.4	239463	12109.9
	31.4323	921429	29314.7	918205	29212.1

## Sheet: set3 2h Rec
2h Rec	Cell: Total Area	Cell: W2 Nucleus Integr Intensity	BP1/Area	Cell: W3 Nucleus Integr Intensity	Hsc70/Area
	3.60061	68104	18914.6	68468	19015.7
	4.69052	54722	11666.5	55176	11763.3
	5.4301	59056	10875.7	59595	10974.9
	5.9556	44369	7449.96	44865	7533.25
	6.1113	51925	8496.55	52501	8590.81
	6.85088	101005	14743.4	101680	14841.9
	7.4153	89425	12059.5	90149	12157.2
	2.95834	38277	12938.7	38425	12988.7
	3.25028	36777	11315	36934	11363.3
	3.54222	90803	25634.5	90985	25685.9
	3.58114	49163	13728.3	49339	13777.4
	3.73685	74824	20023.3	75016	20074.7
	3.98986	38304	9600.33	38491	9647.2
	4.02879	33363	8281.15	33548	8327.07
	4.35965	38804	8900.71	39006	8947.04
	4.78783	119957	25054.5	120203	25105.9
	4.90461	52983	10802.7	53228	10852.6
	5.68312	67080	11803.4	67358	11852.3
	6.07238	51773	8525.99	52057	8572.76
	6.16969	57450	9311.65	57743	9359.14
	9.06964	103722	11436.2	104168	11485.4
	15.0447	166574	11071.9	167291	11119.6
	2.86102	26614	9302.27	26478	9254.73
	3.50329	24217	6912.64	24051	6865.25
	3.63953	84092	23105.2	83908	23054.6
	3.89255	93242	23954	93046	23903.6
	4.49589	107637	23941.2	107408	23890.2
	4.6516	57629	12389.1	57398	12339.4
	4.98246	48305	9695.01	48078	9649.45
	5.68312	57062	10040.6	56793	9993.28
	6.03345	55282	9162.59	54996	9115.18
	6.92874	158085	22815.9	157729	22764.5
	7.39584	93723	12672.4	93373	12625.1
	9.06964	75072	8277.29	74662	8232.08
	9.75083	113966	11687.8	113495	11639.5
	11.1327	296277	26613.2	295705	26561.9
	13.4682	146058	10844.6	145419	10797.2
	3.07511	34044	11070.8	33893	11021.7
	3.07511	58933	19164.5	58776	19113.4
	3.71738	124949	33612.1	124758	33560.7
	3.91201	67208	17179.9	67009	17129
	4.1261	38894	9426.33	38697	9378.59
	4.26234	86589	20314.9	86370	20263.5
	5.54688	95789	17269	95506	17218
	5.54688	204337	36838.2	204052	36786.8
	6.20861	93506	15060.7	93197	15010.9
	6.34485	98865	15581.9	98544	15531.3
	6.65626	125186	18807.3	124848	18756.5
	7.51262	276024	36741.4	275638	36690
	9.94546	151822	15265.5	151320	15215
	10.0622	152529	15158.6	152024	15108.4
	2.9778	76863	25812	77322	25966.2
	3.83416	110155	28729.9	110746	28884
	4.32073	67357	15589.3	68013	15741.1
	4.47643	40121	8962.72	40750	9103.24
	5.74151	75550	13158.6	76407	13307.8
	6.28647	48702	7747.12	49539	7880.26
	8.46629	132361	15633.9	133650	15786.1
	8.85555	95976	10838	97183	10974.3
	8.9334	117308	13131.4	118579	13273.7
	11.7555	163160	13879.5	164912	14028.5
	2.89995	37155	12812.3	37013	12763.3
	3.03619	78242	25769.8	78087	25718.8
	3.50329	23418	6684.57	23280	6645.18
	4.04825	67878	16767.2	67676	16717.3
	4.57374	92440	20211	92205	20159.6
	5.13816	125832	24489.7	125573	24439.3
	5.13816	55366	10775.4	55130	10729.5
	5.15763	69616	13497.7	69368	13449.6
	6.24754	71322	11416	71032	11369.6
	6.90927	73439	10629	73107	10581
	7.4153	112206	15131.7	111840	15082.3
	10.3931	170721	16426.4	170204	16376.6
	11.3662	109233	9610.3	108734	9566.4

## Sheet: set3 1h Rec
1h Rec	Cell: Total Area	Cell: W2 Nucleus Integr Intensity	BP1/Area	Cell: W3 Nucleus Integr Intensity	Hsc70/Area
	2.93887	96146	32715.3	95693	32561.1
	3.30867	50805	15355.1	50298	15201.9
	6.24754	71233	11401.8	70328	11256.9
	6.96766	93699	13447.7	92670	13300
	8.81662	103949	11790.1	102653	11643.1
	16.1541	152869	9463.18	150628	9324.46
	3.26974	33368	10205.1	33222	10160.4
	3.62007	31491	8699	31327	8653.7
	3.69792	92462	25003.8	92272	24952.4
	3.9704	24846	6257.81	24692	6219.02
	4.47643	33229	7423.1	33043	7381.55
	4.49589	51131	11372.8	50919	11325.7
	4.67106	49480	10592.9	49260	10545.8
	5.23548	47015	8980.08	46772	8933.66
	5.33279	139445	26148.6	139171	26097.2
	5.39118	46104	8551.75	45864	8507.23
	5.56634	52337	9402.4	52081	9356.41
	6.53948	73775	11281.5	73462	11233.6
	7.08444	74314	10489.8	73984	10443.2
	8.11596	81333	10021.4	80960	9975.4
	8.73877	85479	9781.58	85075	9735.35
	9.30319	108862	11701.6	108415	11653.5
	9.36158	81209	8674.71	80779	8628.78
	10.8991	144921	13296.6	144386	13247.5
	3.1335	30387	9697.46	30687	9793.2
	3.25028	64751	19921.7	65085	20024.4
	3.95094	79974	20241.8	80380	20344.5
	4.24288	32320	7617.47	32696	7706.09
	4.26234	47011	11029.4	47423	11126
	4.6516	10150	2182.05	10378	2231.06
	4.86569	35550	7306.27	35980	7394.64
	5.7999	95181	16410.8	95754	16509.6
	6.01399	42917	7136.2	43422	7220.17
	7.18175	55474	7724.3	56101	7811.6
	7.60993	86544	11372.5	87278	11469
	9.59513	94868	9887.1	95779	9982.04
	9.88707	78439	7933.49	79296	8020.17
	2.91941	25771	8827.47	25771	8827.47
	3.21135	38060	11851.7	38060	11851.7
	3.48383	22275	6393.82	22275	6393.82
	3.91201	42416	10842.5	42416	10842.5
	3.91201	28855	7376	28855	7376
	4.16503	50852	12209.3	50852	12209.3
	4.20395	40935	9737.27	40935	9737.27
	4.90461	37184	7581.44	37184	7581.44
	5.02139	49225	9803.07	49225	9803.07
	5.76097	113849	19762.1	113849	19762.1
	6.05291	52418	8659.96	52418	8659.96
	6.15023	92863	15099.1	92863	15099.1
	6.40324	65733	10265.6	65733	10265.6
	7.08444	56684	8001.2	56684	8001.2
	7.9408	64584	8133.19	64584	8133.19
	9.10856	90475	9932.96	90475	9932.96
	2.86102	23431	8189.73	23431	8189.73
	2.93887	26467	9005.83	26467	9005.83
	3.03619	11604	3821.9	11604	3821.9
	3.2892	24801	7540.12	24801	7540.12
	3.75631	40216	10706.3	40216	10706.3
	3.79523	26323	6935.8	26323	6935.8
	4.08718	32844	8035.87	32844	8035.87
	4.08718	92316	22586.7	92316	22586.7
	4.35965	62889	14425.2	62889	14425.2
	4.84622	95914	19791.5	95914	19791.5
	5.68312	74663	13137.7	74663	13137.7
	5.76097	119082	20670.5	119082	20670.5
	8.07704	60102	7441.09	60102	7441.09
	10.0817	143006	14184.7	143006	14184.7
	10.9186	41230	3776.13	41230	3776.13

## Sheet: set3 HS
HS	Cell: Total Area	Cell: W2 Nucleus Integr Intensity	BP1/Area	Cell: W3 Nucleus Integr Intensity	Hsc70/Area
	3.23082	62747	19421.4	62912	19472.5
	3.34759	55861	16686.9	56028	16736.8
	3.63953	61145	16800.2	61325	16849.7
	4.24288	95674	22549.3	95891	22600.5
	4.34019	113088	26056	113308	26106.7
	4.53482	118284	26083.5	118517	26134.9
	4.6516	199649	42920.5	199888	42971.9
	4.90461	118922	24247	119173	24298.2
	7.04551	178526	25339	178888	25390.3
	10.432	269940	25876.1	270475	25927.4
	14.4024	310950	21590.1	311684	21641.1
	18.3728	409609	22294.3	410549	22345.4
	3.23082	73925	22881.2	73925	22881.2
	3.54222	90909	25664.4	90909	25664.4
	3.71738	189399	50949.5	189399	50949.5
	3.83416	84284	21982.4	84284	21982.4
	4.10664	107663	26216.8	107663	26216.8
	4.20395	126751	30150.4	126751	30150.4
	4.55428	135084	29660.9	135084	29660.9
	5.70258	153690	26950.9	153690	26950.9
	7.02605	124830	17766.7	124830	17766.7
	7.08444	189972	26815.4	189972	26815.4
	7.16229	146135	20403.4	146135	20403.4
	7.43477	149922	20165	149922	20165
	8.31059	158397	19059.7	158397	19059.7
	10.0038	199298	19922.1	199298	19922.1
	11.775	360269	30596.2	360269	30596.2
	13.9159	351947	25291.1	351947	25291.1
	3.09458	63446	20502.3	63446	20502.3
	3.21135	82789	25780.1	82789	25780.1
	3.25028	70314	21633.2	70314	21633.2
	3.25028	106317	32710.1	106317	32710.1
	3.60061	101919	28306.1	101919	28306.1
	3.67846	78254	21273.6	78254	21273.6
	3.79523	73607	19394.6	73607	19394.6
	3.91201	82695	21138.7	82695	21138.7
	4.00932	61500	15339.2	61500	15339.2
	4.08718	133095	32564.1	133095	32564.1
	4.70998	105911	22486.5	105911	22486.5
	5.31333	156355	29426.9	156355	29426.9
	5.4301	125082	23034.9	125082	23034.9
	5.66366	136787	24151.7	136787	24151.7
	6.38378	185844	29111.9	185844	29111.9
	6.85088	206540	30147.9	206540	30147.9
	8.34952	203223	24339.5	203223	24339.5
	8.52468	191576	22473.1	191576	22473.1
	9.57567	203632	21265.6	203632	21265.6
	9.73137	191451	19673.6	191451	19673.6
	10.4126	227464	21845.1	227464	21845.1
	11.2105	263436	23499	263436	23499
	11.8917	318965	26822.4	318965	26822.4
	12.3783	296461	23950.1	296461	23950.1
	16.2125	284576	17552.9	284576	17552.9
	4.63213	107682	23246.7	107682	23246.7
	4.84622	115797	23894.3	115797	23894.3
	4.84622	140387	28968.3	140387	28968.3
	5.15763	194900	37788.7	194900	37788.7
	6.38378	176973	27722.3	176973	27722.3
	12.9427	281637	21760.3	281637	21760.3
	3.09458	76222	24630.8	76222	24630.8
	4.10664	95639	23288.9	95639	23288.9
	4.22341	124186	29404.2	124186	29404.2
	4.70998	108107	22952.7	108107	22952.7
	5.29387	132747	25075.6	132747	25075.6
	5.9556	124976	20984.6	124976	20984.6
	5.99452	181390	30259.3	181390	30259.3
	6.18915	130222	21040.4	130222	21040.4
	7.74617	120359	15537.9	120359	15537.9
	9.4005	332390	35358.7	332390	35358.7
	9.73137	215930	22189.1	215930	22189.1
	3.05565	71948	23545.9	71793	23495.2
	3.19189	70904	22213.8	70740	22162.4
	3.98986	101323	25395.1	101118	25343.7
	4.61267	103791	22501.3	103554	22449.9
	5.09924	61844	12128.1	61588	12077.9
	6.20861	216165	34816.9	215846	34765.6
	6.28647	121249	19287.3	120933	19237
	6.46163	152483	23598.2	152154	23547.3
	7.53208	177454	23559.8	177070	23508.8

## Sheet: set3 Ctl
Ctl	Cell: Total Area	Cell: W2 Nucleus Integr Intensity	BP1/Area	Cell: W3 Nucleus Integr Intensity	Hsc70/Area
	3.07511	6148	1999.28	5997	1950.17
	3.09458	17889	5780.76	17667	5709.02
	3.1335	19628	6263.92	19376	6183.5
	3.54222	24058	6791.79	23752	6705.4
	3.60061	30836	8564.11	30538	8481.35
	4.32073	28150	6515.1	27801	6434.33
	3.42544	59108	17255.6	59280	17305.8
	3.69792	37807	10223.9	37990	10273.3
	3.71738	27860	7494.52	28020	7537.56
	4.02879	37294	9256.88	37488	9305.03
	4.37912	22482	5133.91	22650	5172.28
	4.67106	102728	21992.4	102967	22043.6
	4.76837	90411	18960.6	90655	19011.7
	5.72205	48499	8475.81	48767	8522.65
	5.89721	32960	5589.08	33193	5628.59
	6.16969	45446	7366.01	45718	7410.1
	6.24754	132074	21140.2	132391	21190.9
	6.267	41967	6696.5	42224	6737.51
	7.70725	75704	9822.45	76072	9870.19
	7.72671	147008	19026	147403	19077.1
	12.8649	114883	8929.98	115457	8974.59
	27.968	297688	10643.9	299023	10691.6
	2.86102	68786	24042.4	68348	23889.4
	2.99726	63091	21049.5	62635	20897.4
	3.2892	66883	20334.1	66376	20180
	3.60061	78214	21722.4	77665	21570
	3.67846	23908	6499.46	23458	6377.13
	3.77577	74856	19825.4	74280	19672.8
	3.95094	87012	22023.1	86403	21869
	4.02879	86293	21419.1	85672	21265
	4.47643	61070	13642.6	60399	13492.7
	4.963	32177	6483.38	31516	6350.19
	5.7999	46557	8027.21	45788	7894.62
	6.13076	80872	13191.2	79981	13045.8
	7.06498	68324	9670.81	67379	9537.05
	8.4079	58936	7009.59	57799	6874.36
	9.16695	206898	22570	205491	22416.5
	9.57567	87745	9163.33	86419	9024.85
	12.0474	485497	40298.8	483640	40144.6
	14.8695	149718	10068.8	147643	9929.23
	17.75	173140	9754.36	170685	9616.05
	3.1335	61334	19573.6	61334	19573.6
	3.17243	57674	18179.8	57674	18179.8
	3.17243	53189	16766	53189	16766
	3.42544	23017	6719.42	23017	6719.42
	3.79523	65404	17233.2	65404	17233.2
	3.98986	15566	3901.39	15566	3901.39
	5.46903	37256	6812.18	37256	6812.18
	5.64419	101424	17969.6	101424	17969.6
	5.91667	111578	18858.2	111578	18858.2
	6.38378	55259	8656.16	55259	8656.16
	11.4441	103812	9071.23	103812	9071.23
	11.8917	119992	10090.4	119992	10090.4
	2.9778	60256	20235.1	57682	19370.7
	4.34019	34314	7906.1	30798	7096
	4.98246	48281	9690.19	44359	8903.03
	5.48849	57597	10494.1	53169	9687.36
	7.2596	59935	8255.96	54730	7538.98

## Sheet: set2 3h Rec
3h Rec	Cell: Total Area	Cell: W2 Nucleus Integr Intensity	BP1/Area	Cell: W3 Nucleus Integr Intensity	Hsc70/Area
	2.89995	115087	39685.9	66792	23032.1
	3.38652	83168	24558.6	35057	10351.9
	3.58114	139435	38935.9	74343	20759.6
	3.58114	50101	13990.2	45125	12600.7
	3.67846	57958	15756.1	56540	15370.6
	4.55428	196881	43229.9	113279	24873.1
	4.8073	103757	21583.2	51697	10753.9
	5.56634	57917	10404.9	77005	13834
	5.83882	122333	20951.7	125931	21567.9
	6.01399	81239	13508.3	49315	8200.05
	7.29853	84152	11530	115003	15757
	8.07704	110845	13723.5	121024	14983.7
	11.9112	237733	19958.8	106643	8953.17
	3.60061	56866	15793.4	123903	34411.7
	4.63213	60811	13128.1	132325	28566.8
	4.82676	67454	13975	74475	15429.6
	5.68312	62996	11084.8	143239	25204.3
	9.4005	109158	11611.9	274139	29162.2
	9.73137	173353	17813.8	201399	20695.9
	13.4877	264878	19638.5	180038	13348.3
	18.5869	234706	12627.5	111880	6019.29
	3.63953	46284	12717	36265	9964.19
	3.8147	64202	16830.2	58845	15425.9
	4.53482	47715	10521.9	28573	6300.8
	5.58581	58103	10401.9	78105	13982.8
	7.82402	94654	12097.9	71995	9201.79
	8.03811	68302	8497.27	40559	5045.84
	12.3394	147033	11915.8	174822	14167.8
	3.34759	37036	11063.5	61917	18496
	3.659	34391	9399.03	27469	7507.25
	3.67846	33358	9068.47	86984	23646.9
	4.41804	46248	10468	33248	7525.51
	5.1187	69840	13644.1	37288	7284.66
	6.32539	76830	12146.3	51361	8119.81
	6.36432	80416	12635.4	104299	16388.1
	6.52002	53430	8194.76	76990	11808.2
	6.9482	68673	9883.57	198341	28545.7
	9.20588	79518	8637.74	194011	21074.7
	3.07511	56441	18354.1	71917	23386.8
	3.73685	110577	29591	56427	15100.2
	3.79523	71487	18836	44714	11781.6
	4.08718	36100	8832.51	43427	10625.2
	4.6516	42939	9231.03	37415	8043.48
	6.9482	125791	18104.1	146350	21063
	8.50522	77109	9066.08	335194	39410.4
	2.9778	40830	13711.5	56368	18929.4
	4.63213	84049	18144.8	107553	23218.9
	4.963	132896	26777.4	86990	17527.7
	5.07978	90538	17823.2	138804	27324.8
	5.70258	77605	13608.7	148358	26015.9
	6.1113	115838	18954.7	72823	11916.1
	6.57841	118956	18082.8	72625	11039.9
	6.75357	118126	17490.9	227334	33661.3
	7.92134	200789	25347.9	115485	14579
	9.0891	123253	13560.5	301711	33194.8

## Sheet: set2 2h Rec
2h Rec	Cell: Total Area	Cell: W2 Nucleus Integr Intensity	BP1/Area	Cell: W3 Nucleus Integr Intensity	Hsc70/Area
	3.05565	34122	11166.9	53282	17437.2
	3.11404	60406	19398	71777	23049.5
	3.38652	31588	9327.58	27182	8026.54
	3.67846	46935	12759.4	67560	18366.4
	3.71738	65877	17721.3	80290	21598.5
	3.9704	38755	9760.98	52448	13209.8
	4.08718	39837	9746.83	86877	21256
	4.34019	45222	10419.4	76206	17558.2
	4.37912	83732	19120.8	65827	15032
	4.49589	85886	19103.2	90548	20140.2
	4.51536	62186	13772.1	70472	15607.2
	5.2744	60907	11547.7	116087	22009.5
	5.68312	47947	8436.74	104347	18360.9
	5.74151	104249	18157.1	142433	24807.6
	5.85829	61937	10572.5	164212	28030.7
	5.89721	95953	16270.9	171949	29157.7
	6.50056	131734	20265	89453	13760.8
	8.85555	79607	8989.51	142163	16053.6
	2.89995	120216	41454.5	70996	24481.8
	3.25028	23847	7336.91	11170	3436.63
	3.30867	63762	19271.2	40263	12169
	3.30867	82274	24866.2	91952	27791.3
	3.42544	49550	14465.3	46897	13690.8
	4.63213	61179	13207.5	58729	12678.6
	4.8073	65173	13557.1	106273	22106.6
	5.15763	80213	15552.3	68337	13249.7
	5.19655	104540	20117.2	47287	9099.69
	5.35225	76420	14278.1	49358	9221.91
	7.72671	102995	13329.7	74225	9606.29
	8.68038	124349	14325.3	73906	8514.14
	8.91394	79901	8963.61	29354	3293.05
	3.01672	78720	26094.5	75724	25101.4
	3.1335	93794	29932.7	104068	33211.4
	3.25028	140350	43180.9	89247	27458.3
	3.87309	67812	17508.5	42599	10998.7
	4.06771	63560	15625.5	89727	22058.3
	4.18449	136404	32597.5	125912	30090.2
	4.55428	183463	40283.6	120889	26544
	5.70258	48723	8544.02	154866	27157.2
	6.34485	62404	9835.37	102818	16204.9
	7.24014	170120	23496.8	128289	17719.1
	8.01865	110024	13721	313495	39095.7
	8.73877	125711	14385.4	88711	10151.4
	16.952	291376	17188.2	465828	27479.2
	2.91941	57888	19828.7	107219	36726.2
	3.32813	45412	13644.9	96670	29046.4
	3.9704	65012	16374.2	169583	42711.8
	4.49589	76664	17052	181325	40331.3
	4.70998	70485	14965	155443	33002.9
	5.56634	87697	15754.9	188956	33946.2
	6.69518	142846	21335.6	246215	36774.9
	7.06498	232928	32969.4	75144	10636.1
	7.53208	112151	14889.8	259391	34438.2
	7.57101	248431	32813.5	94725	12511.5
	2.91941	71077	24346.3	63453	21734.9
	3.01672	58551	19408.8	56243	18643.7
	3.09458	53279	17216.9	94453	30522.1
	3.1335	50410	16087.4	83342	26597.1
	3.52276	89721	25469	76419	21693
	3.60061	74849	20787.9	131559	36538
	3.83416	89585	23365	82430	21498.8
	3.85362	55470	14394.2	137600	35706.7
	4.08718	137959	33754.1	131861	32262.1
	4.32073	93054	21536.6	83785	19391.4
	5.04085	186645	37026.5	174082	34534.3
	5.89721	87653	14863.5	225855	38298.6
	7.35692	115218	15661.2	238632	32436.4
	7.59047	198454	26145.2	259015	34123.7
	11.3857	213965	18792.4	258722	22723.4
	14.0716	304187	21617.1	701396	49844.9
	3.03619	33420	11007.2	68498	22560.5
	3.56168	157307	44166.5	67333	18904.8
	5.9556	73681	12371.7	46861	7868.39
	6.03345	63974	10603.2	89364	14811.4
	6.81196	89091	13078.6	159926	23477.2
	7.14283	81649	11430.9	124539	17435.5

## Sheet: set2 1h Rec
1h Rec	Cell: Total Area	Cell: W2 Nucleus Integr Intensity	BP1/Area	Cell: W3 Nucleus Integr Intensity	Hsc70/Area
	2.88049	48575	16863.5	58262	20226.5
	3.11404	39866	12802	58893	18912.1
	3.63953	79260	21777.5	105197	28904
	4.08718	73445	17969.6	111915	27382
	4.53482	138566	30556	104284	22996.3
	6.34485	96063	15140.3	84576	13329.9
	6.46163	108664	16816.8	103839	16070.1
	7.9408	124439	15670.8	120608	15188.4
	8.01865	154306	19243.4	204726	25531.2
	8.87501	142722	16081.3	142043	16004.8
	3.25028	54667	16819.2	74285	22855
	3.48383	67047	19245.2	67890	19487.2
	3.71738	99129	26666.3	100722	27094.9
	3.77577	60269	15962	68697	18194.2
	4.57374	160980	35196.5	131293	28705.8
	4.59321	109908	23928.4	40200	8752.06
	5.23548	99028	18914.8	114655	21899.6
	5.58581	207487	37145.4	190211	34052.6
	6.03345	79255	13135.9	147190	24395.7
	6.44217	118808	18442.2	150833	23413.4
	8.2522	214007	25933.3	73790	8941.86
	9.0891	160944	17707.4	230154	25322
	10.0428	179278	17851.4	264507	26338
	13.6045	185886	13663.6	99309	7299.74
	2.93887	52691	17929	80221	27296.5
	4.45697	90585	20324.4	82072	18414.3
	4.86569	91896	18886.5	83567	17174.8
	8.75823	182389	20824.9	230708	26341.8
	9.26426	208345	22489.1	281601	30396.5
	9.61459	223311	23226.3	347369	36129.3
	14.636	378149	25836.9	362823	24789.8
	2.88049	24836	8622.16	54825	19033.2
	2.89995	95417	32903	86139	29703.6
	4.00932	62502	15589.2	104116	25968.5
	4.18449	106576	25469.3	96907	23158.6
	5.60527	104805	18697.6	151887	27097.2
	6.22808	162328	26063.9	150307	24133.8
	6.30593	150446	23857.9	128283	20343.2
	8.07704	188487	23336.2	131198	16243.3
	9.38104	146971	15666.8	233766	24919
	12.1058	315693	26077.8	309029	25527.3
	2.93887	90083	30652.2	99929	34002.5
	3.09458	58970	19055.9	103327	33389.7
	3.36705	59277	17605	70513	20942
	3.67846	118776	32289.6	131965	35875.1
	3.8147	129288	33892.1	130976	34334.6
	5.85829	174754	29830.2	216667	36984.7
	8.48576	265457	31282.7	388190	45746.1
	9.49782	239004	25164.1	253688	26710.1
	10.2763	174550	16985.6	208017	20242.3

## Sheet: set2 HS
HS	Cell: Total Area	Cell: W2 Nucleus Integr Intensity	BP1/Area	Cell: W3 Nucleus Integr Intensity	Hsc70/Area
	3.09458	123064	39767.6	64462	20830.6
	3.09458	91722	29639.6	59404	19196.2
	3.52276	97195	27590.6	46829	13293.3
	3.60061	146702	40743.7	92367	25653.2
	3.85362	111979	29058.1	86133	22351.2
	4.2818	119578	27927	56511	13197.9
	4.82676	64539	13371.1	46486	9630.89
	4.84622	193531	39934.4	109120	22516.5
	5.25494	191450	36432.4	143558	27318.7
	5.66366	149706	26432.7	100308	17710.8
	7.1039	157843	22219.2	132189	18607.9
	7.2596	247917	34150.2	167073	23014.1
	8.33005	305930	36726.1	186054	22335.3
	9.67298	254153	26274.5	161329	16678.3
	10.0038	261228	26112.7	176543	17647.5
	13.4877	387742	28747.9	275741	20443.9
	15.2004	444509	29243.2	320560	21088.9
	16.0373	517736	32283.2	354124	22081.3
	16.1151	509170	31595.7	333500	20694.8
	3.05565	33191	10862.2	31824	10414.8
	3.21135	70264	21879.9	64780	20172.2
	3.46437	108639	31359	40508	11692.8
	3.48383	125396	35993.7	52023	14932.7
	4.69052	156382	33340	92976	19822.1
	5.39118	189722	35191.2	86645	16071.6
	5.62473	115411	20518.5	76353	13574.5
	6.4227	270731	42152.2	148161	23068.3
	8.99179	181835	20222.3	114094	12688.7
	10.2179	239556	23444.6	136193	13328.8
	10.685	336462	31489.1	163872	15336.6
	11.4246	318940	27916.9	175547	15365.7
	2.93887	58502	19906.3	37621	12801.2
	3.03619	51079	16823.4	39446	12992
	3.03619	53264	17543.1	35506	11694.3
	3.17243	97331	30680.3	49967	15750.4
	3.85362	117335	30448	52516	13627.7
	3.89255	78806	20245.3	43547	11187.3
	5.9556	119544	20072.5	86244	14481.2
	9.30319	121179	13025.5	123642	13290.3
	9.63406	122642	12730	126692	13150.4
	9.65352	264423	27391.4	145828	15106.2
	17.5943	249408	14175.5	201521	11453.8
	2.88049	135204	46937.9	74697	25932.1
	3.21135	90458	28168.2	69342	21592.8
	3.2892	75497	22953	50105	15233.2
	3.89255	123532	31735.5	85898	22067.3
	4.76837	155242	32556.6	113689	23842.3
	5.15763	127588	24737.7	79346	15384.2
	5.50796	185831	33738.7	131157	23812.3
	5.62473	133456	23726.6	106524	18938.5
	6.88981	203991	29607.6	118432	17189.4
	7.08444	187222	26427.2	106949	15096.3
	8.56361	213622	24945.3	137839	16095.9
	8.58307	44692	5207	24680	2875.43
	8.73877	166362	19037.2	122982	14073.1
	8.85555	218301	24651.3	138852	15679.7
	8.89447	327715	36844.8	154639	17386
	3.50329	146063	41693.1	98787	28198.3
	3.58114	110319	30805.5	65739	18357
	3.62007	81561	22530.2	71902	19862
	3.73685	69336	18554.7	33118	8862.55
	4.32073	72390	16754.1	89135	20629.6
	4.51536	163540	36218.6	134929	29882.3
	5.23548	136848	26138.6	134245	25641.4
	5.2744	189744	35974.5	152332	28881.4
	5.83882	206480	35363.3	172457	29536.3
	6.15023	172202	27999.3	125310	20374.9
	6.32539	124739	19720.4	124492	19681.3
	7.31799	183898	25129.6	140866	19249.3
	7.33745	150524	20514.5	93982	12808.5
	8.69985	189464	21777.9	172176	19790.7
	10.1012	233919	23157.6	137040	13566.8
	11.1132	289523	26052.1	242528	21823.4
	13.7407	328690	23920.9	222264	16175.6

## Sheet: set2 Ctl
Ctl	Cell: Total Area	Cell: W2 Nucleus Integr Intensity	BP1/Area	Cell: W3 Nucleus Integr Intensity	Hsc70/Area
	3.38652	41176	12158.8	16285	4808.78
	3.8147	75931	19904.9	20732	5434.77
	5.15763	216707	42016.8	51830	10049.2
	5.33279	162883	30543.7	44420	8329.6
	5.33279	142941	26804.2	59411	11140.7
	5.78043	77948	13484.8	32397	5604.6
	6.09184	100671	16525.6	30512	5008.67
	6.267	119716	19102.6	49029	7823.36
	7.02605	88996	12666.6	33264	4734.38
	7.43477	106149	14277.4	32637	4389.78
	9.22534	163993	17776.4	58274	6316.73
	9.75083	82402	8450.76	48357	4959.27
	12.4951	190563	15251	68609	5490.88
	2.99726	72437	24167.7	30631	10219.7
	3.56168	58567	16443.6	20782	5834.88
	7.68778	99407	12930.5	29674	3859.89
	3.32813	30072	9035.71	9090	2731.26
	3.36705	48273	14336.9	19660	5838.93
	3.83416	40084	10454.4	19622	5117.68
	4.32073	61418	14214.7	20350	4709.85
	5.50796	74095	13452.4	28049	5092.45
	8.69985	74034	8509.81	33157	3811.22
	9.20588	99137	10768.9	48895	5311.28
	2.89995	98227	33872	34363	11849.5
	2.91941	71865	24616.3	21511	7368.27
	2.95834	31144	10527.5	13886	4693.85
	3.05565	73348	24004.1	16959	5550.05
	3.25028	58340	17949.2	17008	5232.78
	4.49589	82731	18401.5	28918	6432.09
	4.88515	85738	17550.7	26302	5384.07
	5.68312	81278	14301.7	32246	5674
	11.2689	204760	18170.3	53202	4721.12
	3.26974	77248	23625.1	27682	8466.12
	3.91201	52499	13420	26794	6849.16
	4.20395	83393	19836.8	33054	7862.6
	4.61267	64299	13939.6	30260	6560.19
	5.31333	234013	44042.6	69862	13148.4
	5.78043	49697	8597.45	30045	5197.71
	12.7092	174138	13701.8	89719	7059.39
	13.9353	244413	17539.1	101251	7265.78
	15.9205	300862	18897.7	112732	7080.92
	2.95834	63663	21519.9	27594	9327.54
	2.95834	19448	6573.96	23757	8030.53
	3.50329	128521	36685.8	36553	10433.9
	4.10664	32990	8033.33	28932	7045.18
	4.963	77867	15689.5	26025	5243.81
	5.13816	207374	40359.6	70001	13623.7
	5.31333	75440	14198.3	39108	7360.36
	8.01865	144057	17965.2	47018	5863.58
	19.4627	354361	18207.1	151772	7798.08
	3.07511	49625	16137.6	20212	6572.77
	3.15296	119933	38038.2	28391	9004.54
	3.56168	44777	12571.9	19611	5506.11
	3.58114	73284	20463.8	22346	6239.9
	3.62007	56210	15527.3	18980	5242.99
	4.14556	76010	18335.3	25274	6096.64
	4.16503	59746	14344.7	18265	4385.33
	5.37172	200578	37339.6	47019	8753.07
	5.60527	86782	15482.2	20215	3606.43

[truncated: 6 more sheets: set1 3h Rec, set1 2h Rec, set1 1h Rec, set1 HS, set1 Ctl, 3 sets ]
